# Supplementary material for: Betamethasone administration during pregnancy is associated with placental epigenetic changes with implications for inflammation
Source: Clin Epigenetics. 2021 Aug 26;13:165. doi: 10.1186/s13148-021-01153-y (PMC8393766; doi:10.1186/s13148-021-01153-y)
Supplement: Supplementary file 11 — Additional file 11: Table S8. Biological function GO terms which are significantly enriched for genes from the turquoise module at FDR-level of 5% [file 13148_2021_1153_MOESM11_ESM.xlsx]

## Sheet: Table S8
Table S8: biological function GO terms which are significantly enriched for genes from the turquoise module at FDR-level of 5%
N_genes: number of genes in gene set
N_overlap: number of genes overlapping between gene set and turquoise module
nominal p-value: nominal p-value for enrichment
FDR: FDR-corrected p-value for enrichment
genes: genes overlapping between turquoise module and GO term
GO term	N_genes	N_overlap	nominal p-value	FDR	genes
GO_BIOLOGICAL_ADHESION	613	223	6.33352e-20	4.65514e-16	EPHA2:PTAFR:MACF1:TACSTD2:NEXN:CYR61:PKN2:GBP1:VCAM1:CD58:S100A10:S100A11:IL6R:SHC1:ADAM15:THBS3:CD84:ATP1B1:SELL:KIFAP3:ABL2:LAMC2:PTPRC:PLXNA2:ITGB1:VCL:ZMIZ1:PDLIM1:COL17A1:ADAM8:RIC8A:CD151:CD81:ILK:LYVE1:PARVA:CD44:HSD17B12:FERMT3:ARL2:RELA:FOLR2:LRRC32:ATM:MCAM:TRIM29:ETS1:CD9:SSPN:PPFIBP1:NCKAP1L:LRP1:PLXNC1:PXN:HMGB1:HSPH1:LMO7:EFNB2:TNFSF13B:GAS6:FERMT2:LGALS3:ZFP36L1:ACTN1:FBLN5:ATXN3:T…
GO_CELL_ACTIVATION	707	246	4.93899e-19	1.81508e-15	GNB1:TNFRSF1B:C1QA:PTAFR:PPIE:JUN:LEPR:VCAM1:RAP1A:CD58:CTSS:S100A11:S100A12:S100A13:IL6R:MNDA:CD84:FCER1G:FCGR2A:FCGR3B:SELL:PTPRC:SOX13:RAB7L1:TMEM63A:KLF6:ITGB1:VCL:ZMIZ1:TSPAN14:BLNK:NFKB2:ADAM8:CD151:CD81:ILK:AMPD3:SVIP:CAT:CD44:FTH1:FERMT3:RAB6A:LRRC32:PRCP:CTSC:ATM:CBL:ITFG2:CD9:SLC2A3:C3AR1:ITPR2:ANO6:METTL7A:BIN2:NCKAP1L:RNF41:STAT6:LRP1:RAP1B:CEP290:LTA4H:UNG:SLC15A4:HMGB1:HSPH1:DGKH:EF…
GO_LOCOMOTION	849	282	1.48838e-18	3.64653e-15	DVL1:SKI:RERE:MIIP:EPHA2:LYPLA2:PTAFR:PHACTR4:MACF1:TACSTD2:JUN:NEXN:CYR61:PKN2:F3:VCAM1:RHOC:CD58:PLEKHO1:S100A12:IL6R:SHC1:ADAM15:ARHGEF2:CD84:FCER1G:ATP1B1:SELL:ABL2:LAMC2:PTPRC:NAV1:ATP2B4:PLXNA2:ENAH:CDC42BPA:SDCCAG8:ITGB1:DDIT4:VCL:KIAA1598:ADAM8:RIC8A:CD151:CD81:ILK:PARVA:CD44:MDK:FERMT3:FAM89B:B3GNT1:PRCP:ATM:DIXDC1:MCAM:SORL1:ETS1:C3AR1:EPS8:ASUN:ANO6:HDAC7:BIN2:NR4A1:NCKAP1L:RNF41:LRP1:…
GO_CELL_MOTILITY	757	253	5.32146e-17	9.77818e-14	SKI:RERE:MIIP:EPHA2:PTAFR:PHACTR4:MACF1:TACSTD2:JUN:NEXN:CYR61:PKN2:F3:VCAM1:RHOC:CD58:PLEKHO1:S100A12:IL6R:SHC1:ADAM15:ARHGEF2:CD84:FCER1G:ATP1B1:SELL:ABL2:LAMC2:PTPRC:NAV1:ATP2B4:PLXNA2:CDC42BPA:SDCCAG8:ITGB1:DDIT4:VCL:KIAA1598:ADAM8:RIC8A:CD151:CD81:ILK:PARVA:CD44:MDK:FERMT3:FAM89B:PRCP:ATM:DIXDC1:MCAM:SORL1:ETS1:C3AR1:EPS8:ASUN:ANO6:HDAC7:BIN2:NR4A1:NCKAP1L:RNF41:LRP1:SRGAP1:OSBPL8:DCN:PLXNC1…
GO_REGULATION_OF_IMMUNE_SYSTEM_PROCESS	731	244	2.54832e-16	3.74603e-13	ISG15:CTNNBIP1:TNFRSF1B:C1QA:C1QC:C1QB:PTAFR:AGO4:AGO1:AGO3:JUN:JAK1:PRKACB:GBP1:VCAM1:RAP1A:CTSS:HAX1:IL6R:SHC1:MNDA:IFI16:CD84:FCER1G:FCGR2A:FCGR3A:SELL:PTPRC:SOX13:RBBP5:RAB7L1:MAPKAPK2:ITGB1:UBE2D1:ZMIZ1:CUEDC2:COL17A1:ADAM8:CD81:RELA:LRRC32:YAP1:BIRC2:ATM:KMT2A:ETS1:C1S:C3AR1:KRAS:ANO6:NCKAP1L:RNF41:STAT6:CMKLR1:UNG:HMGB1:HSPH1:RB1:EFNB2:TNFSF13B:GAS6:NFKBIA:LGALS3:HIF1A:ZFP36L1:FOS:IGHM:KLF…
GO_DEFENSE_RESPONSE	693	232	1.08357e-15	1.32738e-12	ISG15:CTNNBIP1:TNFRSF1B:EPHA2:PLA2G2A:C1QA:C1QC:C1QB:PTAFR:JUN:JAK1:PRKACB:GBP1:GBP2:F3:VCAM1:CAPZA1:CD58:CTSS:S100A12:IL6R:ADAR:SHC1:ADAM15:ARHGEF2:MNDA:IFI16:CD84:FCER1G:MR1:NCF2:PTPRC:MAPKAPK2:OPTN:VIM:ITGB1:UBE2D1:DDIT4:IFIT2:IFIT3:BLNK:CUEDC2:BNIP3:ADAM8:IFITM2:IFITM3:SIGIRR:CD44:MDK:FAM111A:RPS6KA4:RELA:FOLR2:PRCP:BIRC2:CASP1:ATM:TRIM29:ETS1:TNFRSF1A:C1S:CD163:C3AR1:KRAS:ANO6:STAT2:LRP1:CMK…
GO_EXTRACELLULAR_STRUCTURE_ORGANIZATION	196	89	9.28406e-15	9.74826e-12	PLOD1:TNFRSF1B:PLA2G2A:PRKACB:CYR61:VCAM1:CTSS:ADAM15:SOAT1:LAMC2:CAPN2:ITGB1:P4HA1:NFKB2:COL17A1:ADAM8:RIC8A:CD44:HSD17B12:CREB3L1:SERPINH1:ETS1:TNFRSF1A:LRP1:LUM:DCN:RB1:COL4A1:COL4A2:GAS6:ERO1L:FBLN5:THBS1:FBN1:SMAD3:LOXL1:MYH11:CRISPLD2:LEPREL4:COL1A1:LAMA3:PRKACA:BCL3:APOC1:PXDN:CYP1B1:ANTXR1:CLASP1:ITGB6:DPP4:ITGA6:COL3A1:COL5A2:CFLAR:ACSL3:COL6A3:FERMT1:CST3:SDC4:PLTP:APP:ADAMTS5:ITGB2:COL…
GO_LYMPHOCYTE_ACTIVATION	300	119	5.7093e-14	5.24542e-11	TNFRSF1B:LEPR:VCAM1:IL6R:MNDA:FCER1G:PTPRC:SOX13:RAB7L1:KLF6:ITGB1:ZMIZ1:BLNK:ADAM8:CD151:CD81:CD44:LRRC32:ATM:ITFG2:NCKAP1L:RNF41:STAT6:UNG:HMGB1:HSPH1:EFNB2:TNFSF13B:GAS6:LGALS3:ZFP36L1:IGHM:EIF2AK4:B2M:RAB27A:SMAD3:SOCS1:PRKCB:IL4R:CYLD:EXOSC6:LGALS9:CCL2:RARA:STAT3:GRB2:MALT1:STK11:TCF3:BST2:TYROBP:AXL:POU2F2:BCL3:BAX:ID2:ZFP36L2:MSH2:MERTK:DPP4:SLC39A10:SLC11A1:INPP5D:FKBP1A:SIRPA:MAFB:SDC4:…
GO_RESPONSE_TO_WOUNDING	332	128	7.52677e-14	6.14687e-11	GNB1:MACF1:JUN:PRKACB:CYR61:F3:CAPZA1:RHOC:ADAM15:FCER1G:MTR:JMJD1C:VCL:PAPSS2:MYOF:CD151:ILK:LYVE1:HPS5:CD44:PHF21A:MDK:FERMT3:PRCP:YAP1:MCAM:ETS1:ADIPOR2:CD9:PHB2:ITPR2:ANO6:LRP1:DCN:ELK3:PEBP1:DGKH:GAS6:HIF1A:MAX:ZFP36L1:THBS1:RAB27A:MAP2K1:SMAD3:ABHD2:PRKCB:SH2B1:MAPK3:VKORC1:ARRB2:COL1A1:GNA13:PRKACA:TYROBP:ZFP36:AXL:PLAUR:BAX:ZFP36L2:PLEK:MERTK:CLASP1:KIAA1715:COL3A1:CFLAR:SLC11A1:DGKD:MYL9…
GO_POSITIVE_REGULATION_OF_IMMUNE_SYSTEM_PROCESS	508	176	1.56408e-13	1.10062e-10	ISG15:CTNNBIP1:C1QA:C1QC:C1QB:PTAFR:JUN:PRKACB:GBP1:VCAM1:RAP1A:CTSS:HAX1:IL6R:MNDA:IFI16:CD84:FCER1G:FCGR2A:FCGR3A:PTPRC:RAB7L1:MAPKAPK2:UBE2D1:ZMIZ1:ADAM8:CD81:RELA:BIRC2:ETS1:C1S:C3AR1:KRAS:ANO6:NCKAP1L:STAT6:CMKLR1:UNG:HMGB1:HSPH1:RB1:EFNB2:TNFSF13B:GAS6:NFKBIA:LGALS3:HIF1A:ZFP36L1:FOS:IGHM:THBS1:EIF2AK4:B2M:SOCS1:PRKCB:IL4R:MAPK3:STX4:CYLD:CMTM3:EXOSC6:ARRB2:LGALS9:EVI2B:CCL2:RARA:STAT3:GRB2…
GO_RESPONSE_TO_CYTOKINE	625	207	1.64719e-13	1.10062e-10	ISG15:SRM:MTHFR:TNFRSF1B:PTAFR:LAPTM5:JUN:JAK1:LEPR:GBP1:GBP2:F3:VCAM1:CAPZA1:HIPK1:CD58:MCL1:HAX1:IL6R:ADAR:SHC1:ARHGEF2:MNDA:IFI16:FCER1G:PTPRC:MAPKAPK2:PTPN14:CAPN2:RHOU:HNRNPU-AS1:HNRNPU:KLF6:VIM:ITGB1:IFIT2:IFIT3:NFKB2:IFITM2:IFITM3:SIGIRR:ILK:CD44:RPS6KA4:RELA:AIP:CCND1:BIRC2:CASP1:CBL:ETS1:ADIPOR2:TNFRSF1A:EPS8:KRAS:STAT2:STAT6:CDK4:RAP1B:CMKLR1:FOXO1:SPRY2:TNFSF13B:GAS6:NFKBIA:GNPNAT1:HIF…
GO_TAXIS	258	105	2.68228e-13	1.64289e-10	DVL1:EPHA2:LYPLA2:PTAFR:NEXN:CYR61:F3:VCAM1:S100A12:IL6R:SHC1:FCER1G:PLXNA2:ENAH:ADAM8:PARVA:B3GNT1:C3AR1:ANO6:BIN2:NR4A1:NCKAP1L:LRP1:PLXNC1:CMKLR1:HMGB1:EFNB2:GAS6:LGALS3:EVL:THBS1:MAP2K1:SMAD3:NPTN:MAPK3:STX4:CKLF:CMTM3:ARRB2:LGALS9:CCL2:GRB2:PIP5K1C:PLAUR:VASP:FPR1:ID2:SPTBN1:B3GNT2:CXCR4:BMPR2:NRP2:KLF7:CREB1:GPC1:PTPRA:PREX1:APP:TIAM1:ITGB2:IL17RA:MAPK1:RAC2:PLXNB2:TYMP:OXSR1:CCR1:PRKCD:WNT…
GO_CYTOKINE_MEDIATED_SIGNALING_PATHWAY	389	141	1.08996e-12	6.16246e-10	ISG15:TNFRSF1B:PTAFR:JAK1:LEPR:GBP1:GBP2:F3:VCAM1:CAPZA1:HIPK1:MCL1:IL6R:ADAR:SHC1:FCER1G:PTPRC:RHOU:KLF6:VIM:ITGB1:IFIT2:IFIT3:IFITM2:IFITM3:SIGIRR:ILK:CD44:RPS6KA4:RELA:AIP:CCND1:BIRC2:CASP1:CBL:ADIPOR2:TNFRSF1A:KRAS:STAT2:STAT6:RAP1B:CMKLR1:FOXO1:TNFSF13B:GAS6:NFKBIA:HIF1A:FOS:IFI27:NDN:B2M:PIAS1:PML:SOCS1:IL4R:MAPK3:STX4:CYLD:MT2A:XAF1:CCL2:RFFL:STAT3:MAP3K3:GRB2:SOCS3:CNN2:TYK2:JUNB:PRKACA:B…
GO_REGULATION_OF_IMMUNE_RESPONSE	482	166	1.46852e-12	7.70974e-10	TNFRSF1B:C1QA:C1QC:C1QB:PTAFR:JUN:JAK1:PRKACB:GBP1:VCAM1:RAP1A:CTSS:IL6R:SHC1:MNDA:IFI16:CD84:FCER1G:FCGR2A:FCGR3A:SELL:PTPRC:RAB7L1:MAPKAPK2:ITGB1:UBE2D1:CUEDC2:COL17A1:ADAM8:CD81:RELA:BIRC2:C1S:C3AR1:KRAS:NCKAP1L:STAT6:CMKLR1:UNG:HMGB1:TNFSF13B:NFKBIA:LGALS3:FOS:IGHM:EIF2AK4:B2M:SMAD3:PIAS1:SOCS1:PRKCB:IL4R:MAPK3:STX4:CYLD:CMTM3:EXOSC6:ARRB2:LGALS9:RARA:COL1A1:GRB2:SEC14L1:SOCS3:RIOK3:PIK3C3:MA…
GO_SUPRAMOLECULAR_FIBER_ORGANIZATION	367	134	2.24311e-12	1.09912e-09	DVL1:PLOD1:TACSTD2:CAPZA1:RHOC:S100A10:HAX1:ARHGEF2:RHOU:VIM:ARHGAP12:ITGB1:P4HA1:ADD3:KIAA1598:TUBGCP2:ILK:ARL2:NUMA1:ARAP1:FCHSD2:SERPINH1:EPS8:NCKAP1L:LUM:SSH1:PXN:RB1:TUBGCP3:CFL2:ACTN1:LTBP2:FBLN5:EVL:TMOD3:CGNL1:SMAD3:WDR73:C15orf38:MEF2A:MYH11:FHOD1:FAM101B:PFN1:GAS7:SSH2:LEPREL4:COL1A1:GRB2:CSNK1D:CEP192:ROCK1:PSTPIP2:LDLR:TPM4:GMFG:VASP:MYADM:ITGB1BP1:ROCK2:CDC42EP3:CYP1B1:RHOQ:SPTBN1:CC…
GO_CELLULAR_COMPONENT_MORPHOGENESIS	557	185	2.86978e-12	1.31831e-09	DVL1:RERE:EPHA2:LYPLA2:AGO4:MACF1:TACSTD2:NEXN:GBP1:RHOC:PLEKHO1:S100A10:S100A13:SHC1:ARHGEF2:PLXNA2:ENAH:RHOU:ITGB1:VCL:KIAA1598:PDZD8:ADAM8:ILK:PARVA:CD44:FERMT3:B3GNT1:ARAP1:TSKU:MTMR2:YAP1:CD9:EPS8:NCKAP1L:LRP1:LLPH:PLXNC1:SSH1:RILPL2:RILPL1:ZMYM2:RB1:FARP1:EFNB2:NFATC4:CFL2:FERMT2:ACTN1:NUMB:LINC00341:SYNE3:EVL:NDN:EIF2AK4:TMOD3:SNX1:MAP2K1:NPTN:C15orf38:MEF2A:MYH11:EEF2K:MAPK3:CDH11:GAS7:PM…
GO_INFLAMMATORY_RESPONSE	274	107	3.62768e-12	1.56844e-09	CTNNBIP1:TNFRSF1B:EPHA2:PLA2G2A:C1QA:PTAFR:JUN:F3:VCAM1:S100A12:IL6R:IFI16:FCER1G:PTPRC:MAPKAPK2:BLNK:CUEDC2:ADAM8:SIGIRR:CD44:RPS6KA4:RELA:FOLR2:PRCP:BIRC2:ATM:ETS1:TNFRSF1A:CD163:C3AR1:ANO6:LRP1:CMKLR1:HMGB1:RB1:NFATC4:NFKBIA:HIF1A:PNMA1:FOS:THBS1:SMAD3:IL4R:CYLD:CD68:KDM6B:PER1:LGALS9:CCL2:IGFBP4:STAT3:NFE2L1:SOCS3:SBNO2:LDLR:TYROBP:AXL:FPR1:REL:IL1R2:IL1RL1:CXCR4:NMI:ITGB6:SLC11A1:SIRPA:ATRN:…
GO_CELL_CELL_ADHESION	341	125	9.43664e-12	3.85329e-09	PTAFR:TACSTD2:NEXN:CYR61:VCAM1:CD58:S100A11:IL6R:SHC1:CD84:SELL:KIFAP3:PTPRC:ITGB1:VCL:ZMIZ1:PDLIM1:ADAM8:RIC8A:ILK:PARVA:CD44:FERMT3:RELA:LRRC32:TRIM29:ETS1:CD9:NCKAP1L:HMGB1:HSPH1:EFNB2:TNFSF13B:GAS6:LGALS3:ZFP36L1:TMOD3:NPTN:PKD1:SOCS1:IL4R:CYLD:CDH11:PIEZO1:LGALS9:CCL2:RARA:VMP1:GRB2:ROCK1:DSC3:DSG2:MALT1:PIP5K1C:PAK4:PVR:MYADM:RAB10:CYP1B1:PLEK:LIMS2:DPP4:ITGA6:SIRPA:BMP2:MYL9:SDC4:ITGB2:MYH…
GO_POSITIVE_REGULATION_OF_DEVELOPMENTAL_PROCESS	642	205	1.14053e-11	4.23366e-09	ISG15:DVL1:CTNNBIP1:TNFRSF1B:PLA2G2A:C1QA:MACF1:LEPRE1:SSBP3:TACSTD2:JUN:JAK1:CYR61:F3:RAP1A:HIPK1:S100A10:HAX1:IL6R:ARHGEF2:ABL2:RGS2:PTPRC:PLXNA2:CAPN2:HNRNPU-AS1:HNRNPU:ITGB1:ZMIZ1:KIAA1598:BNIP3:ADAM8:ILK:RELA:CCND1:NUMA1:YAP1:ETS1:TNFRSF1A:C3AR1:KRAS:ANO6:HDAC7:NCKAP1L:STAT6:LRP1:LLPH:NAP1L1:DCN:PLXNC1:CMKLR1:UNG:KDM2B:HMGB1:RB1:EFNB2:TNFSF13B:GAS6:DDHD1:HIF1A:ZFP36L1:NUMB:FOS:THBS1:BLOC1S6:…
GO_POSITIVE_REGULATION_OF_MULTICELLULAR_ORGANISMAL_PROCESS	784	241	1.17541e-11	4.23366e-09	ISG15:DVL1:CTNNBIP1:C1QA:PTAFR:MACF1:LEPRE1:JUN:JAK1:LEPR:CYR61:F3:RAP1A:HIPK1:CD58:PRKAB2:HAX1:IL6R:ARHGEF2:IFI16:FCER1G:ABL2:RGS2:PTPRC:MAPKAPK2:PLXNA2:ITGB1:ZMIZ1:SCD:NFKB2:KIAA1598:ADAM8:POLR2L:ILK:RELA:CCND1:NUMA1:SYTL2:MRE11A:YAP1:BIRC2:CASP1:ETS1:ADIPOR2:C3AR1:ANO6:HDAC7:NCKAP1L:STAT6:LRP1:LLPH:NAP1L1:LUM:PLXNC1:CMKLR1:SSH1:UNG:KDM2B:HMGB1:RB1:EFNB2:GAS6:NFATC4:HIF1A:ZFP36L1:NUMB:FOS:THBS1…
GO_REGULATION_OF_CELL_ACTIVATION	251	99	1.20962e-11	4.23366e-09	TNFRSF1B:C1QA:PTAFR:VCAM1:IL6R:MNDA:CD84:FCER1G:PTPRC:SOX13:ZMIZ1:ADAM8:CD81:LRRC32:ATM:CD9:NCKAP1L:RNF41:STAT6:UNG:HMGB1:HSPH1:EFNB2:TNFSF13B:GAS6:LGALS3:ZFP36L1:IGHM:THBS1:SOCS1:IL4R:STX4:CYLD:EXOSC6:LGALS9:CCL2:RARA:GRB2:MALT1:LDLR:TYROBP:AXL:ID2:ZFP36L2:MSH2:PLEK:IL1RL1:MERTK:DPP4:SLC39A10:INPP5D:SIRPA:SDC4:NFATC2:SAMSN1:APP:ITGB2:HMOX1:RAC2:LGALS1:TGFBR2:PRKCD:WNT5A:NFKBIZ:PLSCR1:PIK3CA:WHSC…
GO_POSITIVE_REGULATION_OF_PHOSPHORUS_METABOLIC_PROCESS	520	173	1.35556e-11	4.52879e-09	DVL1:CAMTA1:PLA2G2A:JUN:GADD45A:PRKACB:CYR61:RAP1A:S100A12:HAX1:IL6R:SHC1:ARHGEF2:FAM129A:PTPRC:ATP2B4:DSTYK:MAPKAPK2:PPP2R5A:CCNY:DUSP5:ADAM8:CD81:ILK:CD44:RPS6KA4:CCND1:MRE11A:ATM:CCND2:TNFRSF1A:PHB2:KRAS:NCKAP1L:LRP1:RAP1B:OSBPL8:DUSP6:MAPKAPK5:GCN1L1:CAMKK2:HMGB1:SPRY2:GAS6:MAP4K5:THBS1:EHD4:MAP2K1:SMAD3:NPTN:IGF1R:LRRK1:PKD1:TRAF7:SOCS1:MAPK3:ARL2BP:ARRB2:KSR1:LGALS9:UNC119:CCL2:IGFBP4:STAT3…
GO_ACTIN_FILAMENT_BASED_PROCESS	394	139	1.5848e-11	5.06447e-09	PHACTR4:TACSTD2:FNBP1L:CAPZA1:RHOC:S100A10:HAX1:SHC1:ARHGEF2:ABL2:CDC42BPA:RHOU:VIM:ARHGAP12:ITGB1:ADD3:KIAA1598:ARFIP2:ILK:PARVA:ARAP1:FCHSD2:DIXDC1:EPS8:KRAS:NCKAP1L:LRP1:SSH1:PXN:CFL2:ACTN1:ATXN3:EVL:INF2:TMOD3:CGNL1:SMAD3:C15orf38:MEF2A:MYH11:FHOD1:FAM101B:PFN1:GAS7:SSH2:GRB2:LLGL2:ROCK1:DSG2:PSTPIP2:CNN2:PIP5K1C:S1PR2:TPM4:MYO9B:BST2:TYROBP:GMFG:VASP:MYADM:ITGB1BP1:ROCK2:CDC42EP3:RHOQ:SPTBN1…
GO_CYTOKINE_PRODUCTION	369	132	1.76595e-11	5.40821e-09	ISG15:TNFRSF1B:EPHA2:PTAFR:GBP1:CD58:S100A12:S100A13:IL6R:ARHGEF2:IFI16:CD84:FCER1G:MR1:PTPRC:MAPKAPK2:CAPN2:SRGN:NFKB2:CUEDC2:ADAM8:SIGIRR:POLR2L:UBE2L6:RPS6KA4:RELA:LRRC32:MRE11A:BIRC2:CASP1:C3AR1:HDAC7:NCKAP1L:STAT6:LRP1:LUM:CMKLR1:HMGB1:GAS6:NFATC4:HIF1A:THBS1:B2M:SMAD3:PML:SOCS1:IL4R:MAPK3:CYLD:MAF:ARRB2:PER1:LGALS9:RARA:STAT3:SEC14L1:RIOK3:MALT1:POLR2E:KLF2:BST2:HOMER3:TYROBP:ZFP36:AXL:BCL3…
GO_WOUND_HEALING	277	106	1.9842e-11	5.83355e-09	GNB1:MACF1:PRKACB:CYR61:F3:CAPZA1:RHOC:ADAM15:FCER1G:JMJD1C:VCL:PAPSS2:MYOF:CD151:ILK:HPS5:CD44:PHF21A:FERMT3:PRCP:YAP1:MCAM:ETS1:ADIPOR2:CD9:ITPR2:ANO6:DCN:ELK3:DGKH:GAS6:HIF1A:THBS1:RAB27A:SMAD3:PRKCB:SH2B1:MAPK3:VKORC1:ARRB2:COL1A1:GNA13:PRKACA:AXL:PLAUR:PLEK:MERTK:CLASP1:KIAA1715:COL3A1:CFLAR:SLC11A1:DGKD:MYL9:SDC4:MAPK1:HPS4:HMOX1:MYH9:PPARA:ITPR1:ZFYVE20:TGFBR2:PRKAR2A:PRKCD:WNT5A:DCBLD2:PL…
GO_IMMUNE_EFFECTOR_PROCESS	628	200	2.7596e-11	7.80119e-09	ISG15:TNFRSF1B:C1QA:C1QC:C1QB:PTAFR:PPIE:GBP1:RAP1A:CD58:CTSS:S100A11:S100A12:S100A13:ADAR:MNDA:IFI16:CD84:FCER1G:FCGR2A:FCGR3A:FCGR3B:SELL:PTPRC:TMEM63A:DDIT4:VCL:TSPAN14:IFIT2:IFIT3:CUEDC2:BNIP3:ADAM8:IFITM2:IFITM3:CD81:AMPD3:SVIP:CAT:CD44:FAM111A:FTH1:RELA:RAB6A:PRCP:CTSC:BIRC2:CBL:ITFG2:C1S:SLC2A3:C3AR1:ANO6:METTL7A:BIN2:NCKAP1L:STAT2:STAT6:LRP1:RAP1B:CEP290:LTA4H:UNG:SLC15A4:HMGB1:PYGL:LGALS…
GO_ANATOMICAL_STRUCTURE_FORMATION_INVOLVED_IN_MORPHOGENESIS	537	176	3.64465e-11	9.92156e-09	DVL1:SKI:MTHFR:EPHA2:LUZP1:PHACTR4:AGO1:SSBP3:JUN:JAK1:LEPR:PRKACB:CYR61:F3:HIPK1:PLEKHO1:SHC1:ADAM15:THBS3:PLXNA2:PTPN14:CAPN2:EGLN1:SDCCAG8:ITGB1:MYOF:NFKB2:ADAM8:ILK:PARVA:CREB3L1:WDR74:PRCP:MTMR2:MCAM:ETS1:ADIPOR2:CD9:FOXJ2:C3AR1:BHLHE41:HDAC7:NR4A1:CEP290:DCN:ELK3:KDM2B:TMED2:FOXO1:SPRY2:EFNB2:TNFSF13B:COL4A1:COL4A2:NFATC4:CFL2:HIF1A:ACTN1:WARS:TNFAIP2:SLC12A6:SPRED1:THBS1:TMOD3:MAP2K1:SMAD3…
GO_POSITIVE_REGULATION_OF_CELL_ADHESION	200	82	7.5764e-11	1.95228e-08	PTAFR:CYR61:VCAM1:S100A10:IL6R:KIFAP3:PTPRC:ZMIZ1:ADAM8:ILK:CD44:HSD17B12:ARL2:RELA:ATM:ETS1:NCKAP1L:HMGB1:HSPH1:EFNB2:TNFSF13B:SMAD3:SOCS1:IL4R:STX4:CYLD:ZFHX3:PIEZO1:LGALS9:CCL2:RARA:GRB2:ROCK1:MALT1:MYADM:ITGB1BP1:MAP4K4:LIMS1:DPP4:ITGA6:SIRPA:FERMT1:SDC4:PREX1:LGALS1:FBLN2:TGFBR2:WNT5A:NFKBIZ:CCDC80:PIK3CA:PPP3CA:MYO10:IL6ST:PIK3R1:CD74:RREB1:NEDD9:LRRC16A:HLA-E:FLOT1:AIF1:HLA-DPA1:HLA-DPB1:V…
GO_LEUKOCYTE_DIFFERENTIATION	227	90	7.70286e-11	1.95228e-08	CTNNBIP1:EPHA2:C1QC:JUN:LEPR:VCAM1:HAX1:IFI16:FCER1G:PTPRC:SOX13:LBR:KLF6:ITGB1:ZMIZ1:BLNK:ADAM8:ATM:ITFG2:NCKAP1L:RNF41:STAT6:HMGB1:RB1:GAS6:ZFP36L1:FOS:B2M:FBN1:IREB2:LRRK1:SOCS1:IL4R:CYLD:LGALS9:EVI2B:RARA:STAT3:NME1:MALT1:SBNO2:STK11:TCF3:JUNB:TYROBP:AXL:POU2F2:BCL3:BAX:RRAS:ID2:ZFP36L2:MSH2:MERTK:CREB1:INPP5D:MAFB:PREX1:NFATC2:APP:THOC5:MYH9:LGALS1:TGFBR2:CCR1:FOXP1:NFKBIZ:HCLS1:RBPJ:SH3RF1:…
GO_INNATE_IMMUNE_RESPONSE	421	144	8.91449e-11	2.18405e-08	ISG15:C1QA:C1QC:C1QB:PTAFR:JAK1:PRKACB:GBP1:GBP2:VCAM1:CAPZA1:CD58:CTSS:S100A12:ADAR:ADAM15:ARHGEF2:MNDA:IFI16:CD84:FCER1G:MR1:NCF2:MAPKAPK2:OPTN:VIM:UBE2D1:IFIT2:IFIT3:ADAM8:IFITM2:IFITM3:CD44:RELA:BIRC2:CASP1:TRIM29:C1S:KRAS:STAT2:HMGB1:NFKBIA:LGALS3:IFI27:EVL:IGHM:B2M:RAB27A:PIAS1:PML:SOCS1:STX4:CYLD:MT2A:ARRB2:XAF1:LGALS9:CCL2:SEC14L1:SOCS3:C17orf62:RAB12:RIOK3:PIK3C3:MALT1:CFD:TYK2:PRKACA:BS…
GO_REGULATION_OF_ANATOMICAL_STRUCTURE_MORPHOGENESIS	548	177	1.2331e-10	2.92364e-08	DVL1:TNFRSF1B:EPHA2:AGO4:AGO1:MACF1:TACSTD2:JAK1:GBP1:F3:RAP1A:RHOC:HIPK1:PLEKHO1:S100A10:S100A13:PLXNA2:CAPN2:RHOU:EGLN1:ITGB1:KIAA1598:PDZD8:BNIP3:ILK:PARVA:CD44:CREB3L1:ARAP1:ETS1:TNFRSF1A:PHB2:FOXJ2:C3AR1:EPS8:HDAC7:STAT2:LRP1:DCN:PLXNC1:SSH1:ZMYM2:SPRY2:EFNB2:TNFSF13B:COL4A2:NFATC4:FERMT2:DDHD1:HIF1A:LINC00341:SYNE3:WARS:INF2:SPRED1:THBS1:MAP2K1:PML:C15orf38:EEF2K:PRKCB:IL4R:ARRB2:PFN1:EPN2:…
GO_REGULATION_OF_CELL_ADHESION	352	124	2.36076e-10	5.42238e-08	EPHA2:PTAFR:MACF1:TACSTD2:CYR61:GBP1:VCAM1:S100A10:IL6R:ADAM15:KIFAP3:ABL2:PTPRC:PLXNA2:ZMIZ1:ADAM8:ILK:CD44:HSD17B12:FERMT3:ARL2:RELA:LRRC32:ATM:ETS1:CD9:NCKAP1L:LRP1:PLXNC1:HMGB1:HSPH1:LMO7:EFNB2:TNFSF13B:LGALS3:ATXN3:THBS1:SMAD3:PML:PKD1:SOCS1:IL4R:STX4:CYLD:ZFHX3:PIEZO1:LGALS9:CCL2:RARA:COL1A1:GRB2:CYTH1:ROCK1:LAMA3:MALT1:MYADM:ITGB1BP1:ROCK2:CYP1B1:MAP4K4:LIMS1:CLASP1:CXCR4:DPP4:ITGA6:SIRPA:…
GO_RESPONSE_TO_BACTERIUM	226	88	3.78751e-10	8.43583e-08	ISG15:TNFRSF1B:EPHA2:PLA2G2A:PTAFR:JUN:NEXN:VCAM1:S100A12:IL6R:SHC1:FCER1G:MR1:RAB7L1:MAPKAPK2:CAPN2:OPTN:VIM:NFKB2:BNIP3:SIGIRR:RELA:CASP1:TNFRSF1A:CDK4:DCN:HMGB1:NFKBIA:PYGL:FOS:IGHM:B2M:LOXL1:MAPK3:CD68:LGALS9:CCL2:RARA:CEP192:MALT1:SBNO2:JUNB:ZFP36:AXL:BCL3:CARD8:CFLAR:SLC11A1:SIRPA:MAVS:BMP2:HCK:ADAMTS5:IFNAR1:MAPK1:TSPO:MYD88:STAB1:PRKCD:WNT5A:FOXP1:CCDC80:RBPJ:HMGB2:PDE4D:MEF2C:FER:SPARC:E…
GO_RESPONSE_TO_INTERFERON_GAMMA	103	50	4.07165e-10	8.80195e-08	PTAFR:JAK1:GBP1:GBP2:VCAM1:CD58:VIM:IFITM2:IFITM3:CD44:CASP1:EVL:B2M:PIAS1:PML:SOCS1:STX4:MT2A:LGALS9:CCL2:SOCS3:RAB12:BST2:ACTR2:NMI:SLC11A1:SP100:SIRPA:HCK:IFNGR2:PRKCD:WNT5A:FLNB:PARP9:PARP14:IRF2:IRF1:EDN1:HLA-A:HLA-E:HLA-B:AIF1:HLA-DRA:HLA-DRB1:HLA-DPA1:HLA-DPB1:ZYX:JAK2:TLR4:WAS
GO_CIRCULATORY_SYSTEM_DEVELOPMENT	540	173	4.20821e-10	8.83725e-08	DVL1:TNFRSF1B:EPHA2:ECE1:LUZP1:AGO1:JUN:JAK1:LEPR:CYR61:F3:VCAM1:RAP1A:HIPK1:IL6R:SHC1:ADAM15:RGS2:PTPN14:EGLN1:HNRNPU-AS1:HNRNPU:ITGB1:ZMIZ1:ACTA2:ADAM8:RIC8A:ILK:PARVA:CREB3L1:PRCP:YAP1:MCAM:ETS1:ADIPOR2:TNFRSF1A:FOXJ2:C3AR1:HDAC7:NR4A1:LRP1:DUSP6:DCN:ELK3:TMED2:FOXO1:RB1:SPRY2:EFNB2:COL4A1:COL4A2:NFATC4:HIF1A:ZFP36L1:WARS:TNFAIP2:SLC12A6:SPRED1:THBS1:FBN1:MAP2K1:SMAD3:LOXL1:PML:MFGE8:MEF2A:PKD…
GO_T_CELL_ACTIVATION	203	81	4.83776e-10	9.87708e-08	TNFRSF1B:LEPR:VCAM1:IL6R:FCER1G:PTPRC:SOX13:RAB7L1:ZMIZ1:ADAM8:CD151:CD44:LRRC32:NCKAP1L:STAT6:HMGB1:HSPH1:EFNB2:TNFSF13B:LGALS3:ZFP36L1:EIF2AK4:B2M:RAB27A:SMAD3:SOCS1:IL4R:CYLD:LGALS9:CCL2:RARA:STAT3:GRB2:MALT1:STK11:BCL3:BAX:ZFP36L2:DPP4:SLC11A1:FKBP1A:SIRPA:MAFB:SDC4:PREX1:NFATC2:MYH9:RAC2:LGALS1:TGFBR2:FOXP1:NFKBIZ:PIK3CA:PPP3CA:SH3RF1:IL6ST:PIK3R1:IRF1:EGR1:CD74:PRELID1:DUSP22:HLA-E:AIF1:HLA…
GO_ADAPTIVE_IMMUNE_RESPONSE	141	62	5.76479e-10	1.14517e-07	TNFRSF1B:C1QA:C1QC:C1QB:CTSS:IL6R:CD84:FCER1G:PTPRC:NFKB2:CD81:CTSC:C1S:STAT6:UNG:HMGB1:TNFSF13B:IGHM:EIF2AK4:B2M:RAB27A:PRKCB:IL4R:EXOSC6:STAT3:MALT1:POU2F2:PVR:BCL3:LAIR1:MSH2:IL1RL1:SLC11A1:INPP5D:SAMSN1:PRKCD:NFKBIZ:ALCAM:RNF168:WHSC1:IL6ST:MEF2C:IRF1:CD74:DUSP22:HLA-A:HLA-E:GNL1:HLA-B:TAP1:TNFRSF21:FYN:TNFAIP3:PTK2B:PAG1:NBN:FAM49B:JAK2:SYK:TLR4:WAS:TFE3
GO_POSITIVE_REGULATION_OF_CYTOKINE_PRODUCTION	204	81	6.40613e-10	1.17827e-07	PTAFR:CD58:IL6R:ARHGEF2:IFI16:FCER1G:PTPRC:MAPKAPK2:NFKB2:ADAM8:POLR2L:RELA:MRE11A:BIRC2:CASP1:C3AR1:STAT6:LRP1:LUM:HMGB1:NFATC4:HIF1A:THBS1:B2M:SMAD3:IL4R:MAPK3:LGALS9:RARA:STAT3:SEC14L1:RIOK3:MALT1:POLR2E:TYROBP:BCL3:CARD8:ROCK2:EIF2AK2:CYP1B1:SPTBN1:IL1RL1:ATF2:CREB1:SLC11A1:LRRFIP1:MAVS:FERMT1:APP:IL17RA:HMOX1:MYD88:SETD2:WNT5A:APPL1:ZBTB20:HEG1:HMGB2:IL6ST:PDE4D:PIK3R1:IRF1:EGR1:CD74:RIPK1:H…
GO_TUBE_DEVELOPMENT	504	163	6.45826e-10	1.17827e-07	DVL1:SKI:CTNNBIP1:MTHFR:EPHA2:LUZP1:PHACTR4:AGO1:SSBP3:TACSTD2:JUN:NFIA:JAK1:LEPR:PRKACB:CYR61:F3:RAP1A:HIPK1:SHC1:ADAM15:PBX1:PLXNA2:EGLN1:SDCCAG8:ITGB1:ZMIZ1:ADAM8:ILK:PARVA:CAT:CREB3L1:PRCP:YAP1:MCAM:CLMP:ETS1:ADIPOR2:PHB2:FOXJ2:C3AR1:KRAS:HDAC7:NR4A1:LRP1:CEP290:DCN:ELK3:KDM2B:TMED2:RB1:SPRY2:EFNB2:COL4A1:COL4A2:NFATC4:HIF1A:ZFP36L1:WARS:TNFAIP2:SLC12A6:SPRED1:THBS1:MAP2K1:SMAD3:PML:MFGE8:PKD…
GO_POSITIVE_REGULATION_OF_CELL_ACTIVATION	151	65	6.55834e-10	1.17827e-07	C1QA:PTAFR:VCAM1:IL6R:FCER1G:PTPRC:ZMIZ1:ADAM8:CD81:NCKAP1L:STAT6:UNG:HMGB1:HSPH1:EFNB2:TNFSF13B:GAS6:IGHM:THBS1:SOCS1:IL4R:STX4:CYLD:EXOSC6:LGALS9:CCL2:RARA:GRB2:MALT1:TYROBP:AXL:MSH2:PLEK:IL1RL1:DPP4:SLC39A10:INPP5D:SIRPA:NFATC2:APP:ITGB2:LGALS1:TGFBR2:WNT5A:NFKBIZ:PIK3CA:WHSC1:IL6ST:PIK3R1:MEF2C:CD74:HLA-E:AIF1:HLA-DPA1:HLA-DPB1:FYN:CTGF:RAC1:CAV1:FAM49B:JAK2:SYK:TLR4:EFNB1:ATP11C
GO_PROTEIN_PHOSPHORYLATION	973	280	6.57264e-10	1.17827e-07	DVL1:EPHA2:PLA2G2A:MKNK1:JUN:JAK1:GADD45A:PRKACB:CYR61:PKN2:GBP1:RAP1A:HIPK1:PRKAB2:S100A12:HAX1:IL6R:ADAR:SHC1:ARHGEF2:ABL2:FAM129A:RGS2:PTPRC:ATP2B4:DSTYK:MAPKAPK2:PPP2R5A:CDC42BPA:CCNY:DDIT4:DUSP5:ADAM8:CD81:CDKN1C:ILK:CD44:RPS6KA4:CCND1:MRE11A:ATM:SIK2:CBL:SORL1:CCND2:TNFRSF1A:PHB2:KRAS:STK38L:NCKAP1L:RNF41:STAT2:LRP1:CDK4:RAP1B:OSBPL8:DUSP6:MAPKAPK5:PEBP1:GCN1L1:CAMKK2:GTF2H3:HMGB1:FOXO1:RB1…
GO_REGULATION_OF_PHOSPHORUS_METABOLIC_PROCESS	855	251	7.5644e-10	1.32377e-07	DVL1:CAMTA1:EPHA2:PLA2G2A:PHACTR4:JUN:GADD45A:PRKACB:CYR61:GBP1:RAP1A:S100A12:HAX1:IL6R:ADAR:SHC1:ARHGEF2:FAM129A:RGS2:PTPRC:ATP2B4:DSTYK:MAPKAPK2:PPP2R5A:HNRNPU-AS1:HNRNPU:CCNY:DDIT4:DUSP5:SHOC2:ADAM8:CD81:CDKN1C:ILK:CD44:CRY2:RPS6KA4:CCND1:SYTL2:MRE11A:MTMR2:ATM:CBL:SORL1:CCND2:TNFRSF1A:PHB2:KRAS:NCKAP1L:RNF41:STAT2:LRP1:CDK4:RAP1B:OSBPL8:DUSP6:MAPKAPK5:PEBP1:GCN1L1:CAMKK2:HMGB1:FOXO1:DNAJC15:R…
GO_RESPONSE_TO_BIOTIC_STIMULUS	414	139	8.19069e-10	1.40004e-07	ISG15:TNFRSF1B:EPHA2:PLA2G2A:PTAFR:JUN:NEXN:GBP1:VCAM1:LAMTOR5:S100A12:IL6R:ADAR:SHC1:ADAM15:IFI16:FCER1G:MR1:PTPRC:RAB7L1:MAPKAPK2:CAPN2:OPTN:VIM:DDIT4:ACTA2:IFIT2:IFIT3:NFKB2:BNIP3:IFITM2:IFITM3:SIGIRR:FAM111A:RELA:BIRC2:CASP1:TNFRSF1A:STAT2:CDK4:DCN:HMGB1:NFKBIA:PYGL:NPC2:FOS:IFI27:IGHM:EIF2AK4:B2M:SMAD3:LOXL1:PML:IL4R:MAPK3:CD68:LGALS9:CCL2:RARA:SEC14L1:CEP192:RIOK3:MALT1:SBNO2:JUNB:BST2:ZFP3…
GO_REGULATION_OF_CELL_DIFFERENTIATION	897	261	8.63657e-10	1.4427e-07	ISG15:DVL1:SKI:CTNNBIP1:PLA2G2A:C1QA:C1QC:AGO4:AGO1:AGO3:MACF1:MYCL:LEPRE1:TACSTD2:JUN:CYR61:GBP1:RAP1A:S100A10:HAX1:IL6R:ARHGEF2:PBX1:ABL2:RGS2:PTPRC:SOX13:RBBP5:RAB7L1:PLXNA2:CAPN2:HNRNPU-AS1:HNRNPU:VIM:ITGB1:ZMIZ1:KIAA1598:ADAM8:CDKN1C:ILK:DENND5A:SDHAF2:FADS1:RELA:CCND1:NUMA1:YAP1:BIRC2:DIXDC1:KMT2A:SORL1:ETS1:TNFRSF1A:FOXJ2:KRAS:BHLHE41:HDAC7:NCKAP1L:RNF41:LRP1:LLPH:NAP1L1:PLXNC1:CMKLR1:SSH1…
GO_TUBE_MORPHOGENESIS	422	141	8.9201e-10	1.45695e-07	DVL1:SKI:CTNNBIP1:MTHFR:EPHA2:LUZP1:PHACTR4:AGO1:TACSTD2:JUN:JAK1:LEPR:PRKACB:CYR61:F3:RAP1A:HIPK1:SHC1:ADAM15:PBX1:EGLN1:SDCCAG8:ITGB1:ZMIZ1:ADAM8:ILK:PARVA:CREB3L1:PRCP:YAP1:MCAM:ETS1:ADIPOR2:PHB2:FOXJ2:C3AR1:KRAS:HDAC7:NR4A1:LRP1:CEP290:DCN:ELK3:KDM2B:TMED2:SPRY2:EFNB2:COL4A1:COL4A2:NFATC4:HIF1A:ZFP36L1:WARS:TNFAIP2:SLC12A6:SPRED1:THBS1:SMAD3:PML:MFGE8:PKD1:PRKCB:PFN1:EPN2:CCL2:RARA:STAT3:PLCD…
GO_NEGATIVE_REGULATION_OF_MULTICELLULAR_ORGANISMAL_PROCESS	543	172	1.26427e-09	2.02009e-07	ISG15:SKI:TNFRSF1B:EPHA2:C1QC:AGO1:TACSTD2:PRKACB:GBP1:ARHGEF2:CD84:PBX1:RGS2:PTPRC:ATP2B4:RAB7L1:VIM:SRGN:CUEDC2:SIGIRR:DENND5A:CREB3L1:UBE2L6:SDHAF2:RPS6KA4:LRRC32:MTMR2:DIXDC1:SORL1:CD9:TNFRSF1A:PHB2:FOXJ2:HDAC7:NCKAP1L:LRP1:DCN:CMKLR1:HMGB1:FOXO1:RB1:SPRY2:EFNB2:COL4A2:GAS6:NFATC4:NFKBIA:HIF1A:ZFP36L1:EVL:KLF13:MEIS2:SPRED1:THBS1:EIF2AK4:B2M:FBN1:SMAD3:PML:HMG20A:VASN:SOCS1:IL4R:CYLD:FAM101B:…
GO_CELL_PROJECTION_ORGANIZATION	738	221	1.39047e-09	2.17446e-07	DVL1:RERE:EPHA2:LYPLA2:MACF1:LEPRE1:TACSTD2:JUN:NEXN:ODF2L:PKN2:FNBP1L:RAP1A:PLEKHO1:SHC1:KIFAP3:ABL2:RGS2:RAB7L1:PLXNA2:ENAH:RHOU:MTR:SDCCAG8:VIM:ITGB1:VCL:BLOC1S2:ARL3:ABLIM1:KIAA1598:ARFIP2:ILK:DENND5A:PARVA:CD44:B3GNT1:ARAP1:TSKU:MTMR2:ZNF259:EMP1:EPS8:ANO6:TUBA1A:NCKAP1L:LRP1:LLPH:CEP290:PLXNC1:NEDD1:SSH1:RILPL2:RILPL1:HMGB1:RB1:SPRY2:FARP1:EFNB2:NFATC4:NUMB:EVL:NDN:EIF2AK4:HAUS2:B2M:BLOC1S6…
GO_CARDIOVASCULAR_SYSTEM_DEVELOPMENT	380	129	1.57175e-09	2.40674e-07	EPHA2:LUZP1:AGO1:JUN:JAK1:LEPR:CYR61:F3:RAP1A:HIPK1:IL6R:SHC1:ADAM15:PTPN14:EGLN1:ITGB1:ZMIZ1:ACTA2:ADAM8:RIC8A:PARVA:CREB3L1:PRCP:YAP1:MCAM:ETS1:ADIPOR2:FOXJ2:C3AR1:HDAC7:NR4A1:LRP1:DCN:ELK3:TMED2:FOXO1:SPRY2:EFNB2:COL4A1:COL4A2:NFATC4:HIF1A:ZFP36L1:WARS:TNFAIP2:SLC12A6:SPRED1:THBS1:MAP2K1:LOXL1:PML:MFGE8:PKD1:PRKCB:EPN2:CCL2:STAT3:PLCD3:COL1A1:MAP3K3:GNA13:SOCS3:ROCK1:STK11:JUNB:KLF2:PAK4:HIF3A…
GO_POSITIVE_REGULATION_OF_CELL_DIFFERENTIATION	471	152	3.03992e-09	4.55988e-07	ISG15:DVL1:CTNNBIP1:PLA2G2A:C1QA:MACF1:LEPRE1:TACSTD2:JUN:CYR61:RAP1A:S100A10:HAX1:IL6R:ARHGEF2:ABL2:RGS2:PTPRC:PLXNA2:CAPN2:HNRNPU-AS1:HNRNPU:ZMIZ1:KIAA1598:ADAM8:ILK:RELA:NUMA1:ETS1:NCKAP1L:LRP1:LLPH:NAP1L1:PLXNC1:CMKLR1:HMGB1:RB1:EFNB2:GAS6:HIF1A:ZFP36L1:NUMB:FOS:BLOC1S6:MAP2K1:SMAD3:PIAS1:NPTN:MEF2A:SOCS1:EEF2K:IL4R:CYLD:ARRB2:LGALS9:EVI2B:RARA:STAT3:COL1A1:SPAG9:NME1:SOCS3:CSNK1D:MALT1:STK11…
GO_REGULATION_OF_CELLULAR_COMPONENT_MOVEMENT	510	162	3.20399e-09	4.70987e-07	MIIP:EPHA2:PTAFR:MACF1:TACSTD2:JUN:NEXN:CYR61:PKN2:F3:RHOC:IL6R:ADAM15:ARHGEF2:ABL2:LAMC2:PTPRC:PLXNA2:VCL:KIAA1598:ADAM8:CD151:CD81:ILK:FERMT3:FAM89B:ARAP1:PRCP:ATM:MCAM:SORL1:ETS1:CD9:C3AR1:ANO6:HDAC7:NCKAP1L:RNF41:LRP1:SRGAP1:OSBPL8:DCN:PLXNC1:CMKLR1:SSH1:HMGB1:SPRY2:GAS6:LGALS3:HIF1A:ACTN1:NUMB:EVL:SPRED1:THBS1:SMAD3:ABHD2:C15orf38:IGF1R:MAPK3:STX4:PFN1:ELP5:LGALS9:CCL2:RFFL:STAT3:PTRF:COL1A1…
GO_ACTIN_FILAMENT_ORGANIZATION	231	87	3.32442e-09	4.79108e-07	TACSTD2:CAPZA1:RHOC:S100A10:HAX1:ARHGEF2:RHOU:ARHGAP12:ADD3:KIAA1598:ARAP1:FCHSD2:EPS8:NCKAP1L:SSH1:PXN:CFL2:ACTN1:EVL:TMOD3:CGNL1:SMAD3:C15orf38:FHOD1:FAM101B:PFN1:GAS7:SSH2:GRB2:ROCK1:PSTPIP2:TPM4:GMFG:VASP:MYADM:ITGB1BP1:ROCK2:CDC42EP3:RHOQ:SPTBN1:ACTR2:PLEK:CAPG:CLASP1:RND3:WIPF1:HCK:SDC4:PREX1:RAC2:CDC42EP1:TWF2:PRKCD:HCLS1:ADD1:WDR1:SLIT2:RUFY3:SHROOM3:SYNPO2:PDLIM3:SORBS2:FAT1:PIK3R1:FER:F…
GO_IMMUNE_SYSTEM_DEVELOPMENT	499	159	3.5494e-09	5.01694e-07	ISG15:CTNNBIP1:EPHA2:C1QC:AGO4:AGO1:AGO3:SSBP3:JUN:LEPR:VCAM1:HIPK1:HAX1:IFI16:FCER1G:PBX1:PTPRC:SOX13:RBBP5:LBR:KLF6:DHTKD1:ITGB1:ZMIZ1:BLNK:NFKB2:ADAM8:CDKN1C:YAP1:ATM:KMT2A:ETS1:ITFG2:ETV6:NCKAP1L:RNF41:STAT6:UNG:HMGB1:RB1:GAS6:NFKBIA:LGALS3:HIF1A:ZFP36L1:ACTN1:FOS:KLF13:MEIS2:THBS1:B2M:FBN1:TMOD3:MAP2K1:SMAD3:PML:IREB2:LRRK1:SOCS1:PRKCB:IL4R:MAPK3:CYLD:EXOSC6:LGALS9:EVI2B:RARA:STAT3:NFE2L1:NM…
GO_REGULATION_OF_LYMPHOCYTE_ACTIVATION	198	77	5.17562e-09	7.1775e-07	TNFRSF1B:VCAM1:IL6R:MNDA:PTPRC:SOX13:ZMIZ1:ADAM8:CD81:LRRC32:ATM:NCKAP1L:RNF41:STAT6:UNG:HMGB1:HSPH1:EFNB2:TNFSF13B:GAS6:LGALS3:ZFP36L1:IGHM:SOCS1:IL4R:CYLD:EXOSC6:LGALS9:CCL2:RARA:GRB2:MALT1:TYROBP:AXL:ID2:ZFP36L2:MSH2:MERTK:DPP4:SLC39A10:INPP5D:SIRPA:SDC4:NFATC2:SAMSN1:RAC2:LGALS1:TGFBR2:NFKBIZ:PIK3CA:WHSC1:SH3RF1:IL6ST:PIK3R1:MEF2C:IRF1:CD74:PRELID1:DUSP22:HLA-E:LST1:AIF1:HLA-DPA1:HLA-DPB1:TNF…
GO_LEUKOCYTE_MIGRATION	181	72	5.28068e-09	7.1876e-07	PTAFR:VCAM1:CD58:S100A12:IL6R:SHC1:CD84:FCER1G:ATP1B1:SELL:ITGB1:ADAM8:CD44:C3AR1:EPS8:ANO6:NCKAP1L:CMKLR1:HMGB1:GAS6:SLC7A7:LGALS3:IGHM:THBS1:MAPK3:CKLF:SLC7A6:LGALS9:CCL2:COL1A1:GRB2:ROCK1:PIP5K1C:MERTK:CXCR4:ITGA6:INPP5D:GPC1:SIRPA:HCK:SDC4:PREX1:APP:ITGB2:IL17RA:HMOX1:MYH9:RAC2:OXSR1:CCR1:WNT5A:PIK3CA:WDR1:SLIT2:ITGA1:PDE4D:PIK3R1:FER:SLC12A2:CD74:EDN1:AIF1:MAPK14:VEGFA:FYN:RAC1:COL1A2:CAV1:P…
GO_POSITIVE_REGULATION_OF_IMMUNE_RESPONSE	388	129	6.86496e-09	9.17408e-07	C1QA:C1QC:C1QB:PTAFR:PRKACB:GBP1:RAP1A:CTSS:IL6R:MNDA:IFI16:FCER1G:FCGR2A:FCGR3A:PTPRC:RAB7L1:MAPKAPK2:UBE2D1:ADAM8:CD81:RELA:BIRC2:C1S:C3AR1:KRAS:NCKAP1L:STAT6:CMKLR1:UNG:HMGB1:TNFSF13B:NFKBIA:LGALS3:IGHM:EIF2AK4:B2M:PRKCB:IL4R:MAPK3:STX4:CYLD:CMTM3:EXOSC6:ARRB2:LGALS9:RARA:GRB2:SEC14L1:RIOK3:PIK3C3:MALT1:CFD:STK11:PRKACA:PVR:BAX:FPR1:MSH2:PSME4:ACTR2:WIPF1:SLC39A10:SLC11A1:INPP5D:MAVS:HCK:NFATC…
GO_CELL_SUBSTRATE_ADHESION	189	74	7.31588e-09	9.60209e-07	MACF1:TACSTD2:CYR61:GBP1:VCAM1:S100A10:ADAM15:THBS3:ITGB1:VCL:COL17A1:ILK:LYVE1:PARVA:CD44:HSD17B12:FERMT3:ARL2:LRP1:PXN:GAS6:FERMT2:ACTN1:FBLN5:ATXN3:THBS1:SMAD3:PKD1:COL1A1:ROCK1:AXL:MYADM:ITGB1BP1:ROCK2:ANTXR1:MAP4K4:LIMS1:MERTK:CLASP1:ITGB6:ITGA6:COL3A1:FERMT1:SDC4:PREX1:TIAM1:ITGB2:RAC2:LGALS1:FBLN2:CCDC80:ITGA1:PIK3R1:FER:DUSP22:RREB1:NEDD9:LRRC16A:VEGFA:CTGF:UTRN:RAC1:CDK6:MKLN1:ZYX:PTK2B:…
GO_PLATELET_ACTIVATION	80	40	7.85744e-09	1.0132e-06	GNB1:FCER1G:VCL:ILK:FERMT3:CD9:ITPR2:DGKH:GAS6:PRKCB:MAPK3:ARRB2:COL1A1:GNA13:AXL:PLEK:MERTK:COL3A1:DGKD:MYL9:MAPK1:MYH9:ITPR1:PRKCD:PLSCR1:RAP2B:PIK3CA:PDGFRA:METAP1:PIK3R1:LCP2:FYN:PDGFA:GNA12:ACTB:COL1A2:TLN1:SYK:TLR4:FLNA
GO_CELL_MORPHOGENESIS_INVOLVED_IN_DIFFERENTIATION	363	122	8.79391e-09	1.1144e-06	DVL1:RERE:EPHA2:LYPLA2:MACF1:TACSTD2:NEXN:GBP1:S100A10:SHC1:PLXNA2:ENAH:ITGB1:VCL:KIAA1598:ILK:PARVA:FERMT3:B3GNT1:TSKU:LRP1:PLXNC1:SSH1:RILPL2:RILPL1:RB1:FARP1:EFNB2:NFATC4:FERMT2:ACTN1:NUMB:EVL:NDN:MAP2K1:NPTN:MEF2A:EEF2K:MAPK3:CDH11:SSH2:GRB2:ROCK1:STK11:AXL:VASP:MYADM:ID2:ITGB1BP1:RAB10:SPTBN1:B3GNT2:ACTR2:ANTXR1:LIMS1:MERTK:TTL:CXCR4:ZEB2:BMPR2:NRP2:KLF7:CREB1:COL6A3:GPC1:STK25:PTPRA:PREX1:A…
GO_POSITIVE_REGULATION_OF_INTRACELLULAR_SIGNAL_TRANSDUCTION	502	158	1.04291e-08	1.29922e-06	CAMTA1:PLA2G2A:AGO1:AGO3:JUN:MIER1:GADD45A:F3:LAMTOR5:RAP1A:RHOC:MCL1:S100A12:S100A4:S100A13:HAX1:SHC1:PTPRC:DSTYK:MAPKAPK2:ITGB1:DUSP5:SHOC2:ADAM8:CD81:ILK:CAT:CD44:RELA:BIRC2:CASP1:ATM:CBL:TNFRSF1A:PHB2:KRAS:LRP1:RAP1B:OSBPL8:DUSP6:DCN:MAPKAPK5:PEBP1:HMGB1:LPAR6:SPRY2:GAS6:MAP4K5:SPRED1:THBS1:MAP2K1:NPTN:IGF1R:LRRK1:TRAF7:PRKCB:MAPK3:ARRB2:SMCR8:KSR1:LGALS9:CCL2:IGFBP4:SPAG9:MAP3K3:DDX5:GRB2:RO…
GO_REGULATION_OF_ACTIN_FILAMENT_BASED_PROCESS	215	81	1.14742e-08	1.40559e-06	TACSTD2:CAPZA1:RHOC:S100A10:HAX1:ABL2:RHOU:ADD3:ILK:ARAP1:FCHSD2:DIXDC1:EPS8:NCKAP1L:LRP1:SSH1:PXN:CFL2:EVL:TMOD3:SMAD3:C15orf38:FHOD1:PFN1:SSH2:GRB2:ROCK1:DSG2:CNN2:BST2:GMFG:VASP:MYADM:ITGB1BP1:ROCK2:CDC42EP3:RHOQ:SPTBN1:CCDC88A:ACTR2:PLEK:CAPG:CLASP1:RND3:WIPF1:HCK:SDC4:PREX1:MYH9:CDC42EP1:TWF2:PRKCD:HCLS1:ADD1:WDR1:SLIT2:PDGFRA:SYNPO2:PDE4D:PIK3R1:MEF2C:FER:FCHSD1:EDN1:LRRC16A:CD2AP:ARHGAP18:…
GO_NEGATIVE_REGULATION_OF_DEVELOPMENTAL_PROCESS	441	142	1.22894e-08	1.48077e-06	SKI:EPHA2:C1QC:AGO1:TACSTD2:PRKACB:GBP1:ARHGEF2:PBX1:RGS2:RAB7L1:HNRNPU-AS1:HNRNPU:VIM:ITGB1:SRGN:BNIP3:DENND5A:CREB3L1:SDHAF2:CCND1:MTMR2:YAP1:DIXDC1:SORL1:PHB2:FOXJ2:KRAS:BHLHE41:HDAC7:LRP1:DCN:HMGB1:FOXO1:RB1:SPRY2:EFNB2:COL4A2:GAS6:NFATC4:NFKBIA:HIF1A:ZFP36L1:KLF13:MEIS2:SPRED1:THBS1:EIF2AK4:B2M:FBN1:SMAD3:PML:HMG20A:C15orf38:VASN:SOCS1:IL4R:FAM101B:PMP22:EPN2:RARA:STAT3:VAT1:NME1:MAP3K3:ROCK…
GO_COAGULATION	171	68	1.43155e-08	1.69708e-06	GNB1:PRKACB:F3:CAPZA1:FCER1G:JMJD1C:VCL:PAPSS2:ILK:HPS5:PHF21A:FERMT3:PRCP:CD9:ITPR2:ANO6:DGKH:GAS6:THBS1:RAB27A:PRKCB:SH2B1:MAPK3:VKORC1:ARRB2:COL1A1:GNA13:PRKACA:AXL:PLAUR:PLEK:MERTK:KIAA1715:COL3A1:DGKD:MYL9:MAPK1:HPS4:MYH9:ITPR1:ZFYVE20:PRKAR2A:PRKCD:PLSCR1:RAP2B:PIK3CA:PDGFRA:METAP1:IRF2:PIK3R1:IRF1:LCP2:EDN1:LRRC16A:FYN:PDGFA:GNA12:ACTB:RAC1:COL1A2:CAV1:CAPZA2:JAK2:TLN1:SYK:TLR4:WAS:FLNA
GO_MYELOID_LEUKOCYTE_ACTIVATION	386	127	1.83604e-08	2.14205e-06	TNFRSF1B:C1QA:PTAFR:PPIE:JUN:RAP1A:CD58:CTSS:S100A11:S100A12:S100A13:MNDA:CD84:FCER1G:FCGR2A:FCGR3B:SELL:PTPRC:TMEM63A:VCL:TSPAN14:ADAM8:AMPD3:SVIP:CAT:CD44:FTH1:RAB6A:PRCP:CTSC:ATM:CBL:SLC2A3:C3AR1:ANO6:METTL7A:BIN2:NCKAP1L:RAP1B:CEP290:LTA4H:SLC15A4:HMGB1:PYGL:LGALS3:NPC2:THBS1:B2M:RAB27A:IL4R:MVP:STX4:CRISPLD2:APRT:CD68:LGALS9:VAT1:TMC6:RAB31:ROCK1:CFD:CNN2:SBNO2:LDLR:AP1M1:BST2:GPI:TYROBP:GMF…
GO_INTEGRIN_MEDIATED_SIGNALING_PATHWAY	59	32	1.99089e-08	2.28641e-06	PHACTR4:ADAM15:FCER1G:ITGB1:ILK:FERMT3:FERMT2:TYROBP:ITGB1BP1:PLEK:LIMS2:ITGB6:ITGA6:COL3A1:FERMT1:HCK:ADAMTS1:ITGB2:MYH9:FYB:ITGA1:NEDD9:DST:CTGF:ZYX:PTK2B:ADAM9:TLN1:SYK:ABL1:TIMP1:FLNA
GO_NEURON_PROJECTION_GUIDANCE	111	49	3.16739e-08	3.58159e-06	DVL1:EPHA2:LYPLA2:NEXN:SHC1:PLXNA2:ENAH:B3GNT1:LRP1:PLXNC1:EFNB2:EVL:NPTN:MAPK3:GRB2:VASP:SPTBN1:B3GNT2:CXCR4:BMPR2:NRP2:KLF7:GPC1:PTPRA:APP:MAPK1:RAC2:PLXNB2:WNT5A:ALCAM:PLXND1:PIK3CA:SLIT2:PALLD:EMB:ZSWIM6:PIK3R1:CYFIP2:PDLIM7:VEGFA:FYN:RAC1:DPYSL2:MATN2:EXT1:VLDLR:SEMA4D:SPTAN1:EFNB1
GO_RESPONSE_TO_GROWTH_FACTOR	386	126	3.5311e-08	3.93237e-06	SKI:KIF1B:TNFRSF1B:EPHA2:JUN:CYR61:VCAM1:RAP1A:SHC1:DSTYK:MAPKAPK2:UBE2D1:DDIT4:MYOF:SHOC2:POLR2L:CDKN1C:ILK:CAT:CD44:CREB3L1:FAM89B:RELA:NUMA1:LRRC32:ZNF259:CBL:NR4A1:HNRNPA1:DUSP6:LUM:DCN:PXN:SPRY2:COL4A2:GAS6:FERMT2:HIF1A:ZFP36L1:LTBP2:FOS:NDN:MEIS2:SPRED1:THBS1:EHD4:FBN1:SMAD3:NPTN:PML:IREB2:VASN:EEF2K:PRKCB:MAPK3:ZFHX3:ARRB2:POLR2A:EPN2:CCL2:COL1A1:DDX5:SMURF2:GRB2:CSNK1D:TGIF1:ROCK1:POLR2E:…
GO_MYELOID_CELL_DIFFERENTIATION	227	83	3.69501e-08	4.05348e-06	ISG15:CTNNBIP1:EPHA2:C1QC:AGO4:AGO1:AGO3:JUN:HAX1:IFI16:FCER1G:RBBP5:LBR:CDKN1C:KMT2A:ETS1:NCKAP1L:RNF41:RB1:NFKBIA:LGALS3:HIF1A:ZFP36L1:ACTN1:FOS:KLF13:MEIS2:THBS1:B2M:FBN1:TMOD3:PML:IREB2:LRRK1:PRKCB:EVI2B:RARA:STAT3:NFE2L1:NME1:SBNO2:JUNB:DNASE2:KLF2:TYROBP:ZFP36:ID2:ACVR2A:CREB1:INPP5D:MYL9:MAFB:APP:THOC5:RBFOX2:MYH9:TNRC6B:TGFBR2:CCR1:FOXP1:HCLS1:ADD1:WDR1:RBPJ:TET2:HMGB2:PIK3R1:MEF2C:CD74:R…
GO_B_CELL_ACTIVATION	116	50	5.8907e-08	6.36716e-06	VCAM1:MNDA:PTPRC:KLF6:ITGB1:BLNK:CD81:ATM:ITFG2:NCKAP1L:STAT6:UNG:TNFSF13B:ZFP36L1:IGHM:PRKCB:CYLD:EXOSC6:MALT1:TCF3:BST2:TYROBP:POU2F2:BCL3:BAX:ID2:ZFP36L2:MSH2:SLC39A10:INPP5D:NFATC2:SAMSN1:LGALS1:PRKCD:RNF168:WHSC1:RBPJ:PIK3R1:MEF2C:CD74:TNFRSF21:TNFAIP3:SKAP2:POLM:PTK2B:NBN:SYK:TLR4:ABL1:ATP11C
GO_INTERFERON_GAMMA_MEDIATED_SIGNALING_PATHWAY	53	29	7.11175e-08	7.57556e-06	PTAFR:JAK1:GBP1:GBP2:VCAM1:CD44:B2M:PIAS1:PML:SOCS1:MT2A:SOCS3:NMI:SP100:HCK:IFNGR2:PRKCD:PARP9:PARP14:IRF2:IRF1:HLA-A:HLA-E:HLA-B:HLA-DRA:HLA-DRB1:HLA-DPA1:HLA-DPB1:JAK2
GO_REGULATION_OF_MYELOID_CELL_DIFFERENTIATION	133	55	7.2813e-08	7.64536e-06	ISG15:CTNNBIP1:C1QC:AGO4:AGO1:AGO3:JUN:HAX1:RBBP5:KMT2A:ETS1:NCKAP1L:RNF41:RB1:NFKBIA:LGALS3:HIF1A:ZFP36L1:FOS:KLF13:MEIS2:THBS1:B2M:FBN1:PRKCB:EVI2B:RARA:STAT3:NME1:TYROBP:ZFP36:ID2:ACVR2A:CREB1:INPP5D:MYL9:MAFB:RBFOX2:TNRC6B:CCR1:FOXP1:HCLS1:HMGB2:PIK3R1:MEF2C:CD74:RIPK1:MAPK14:CDK6:KMT2E:PTK2B:TRIB1:MYC:TLR4:TFE3
GO_CYTOSKELETON_ORGANIZATION	689	201	8.24214e-08	8.53236e-06	DVL1:PHACTR4:MAP7D1:MACF1:TACSTD2:GADD45A:NEXN:CAPZA1:RHOC:S100A10:HAX1:SHC1:ARHGEF2:ABL2:NAV1:CAPN2:CDC42BPA:RHOU:SDCCAG8:HNRNPU-AS1:HNRNPU:VIM:SVIL:ARHGAP12:ITGB1:ADD3:ABLIM1:KIAA1598:PDZD8:TUBGCP2:ARFIP2:ILK:PARVA:ARL2:NUMA1:ARAP1:FCHSD2:DIXDC1:ZNF259:EPS8:KRAS:ASUN:TUBA1A:TUBA1C:NCKAP1L:LRP1:SSH1:PXN:SPRY2:TUBGCP3:CFL2:ACTN1:ATXN3:LINC00341:SYNE3:EVL:MARK3:INF2:NUSAP1:HAUS2:TMOD3:CGNL1:SMAD3:…
GO_REGULATION_OF_INTRACELLULAR_SIGNAL_TRANSDUCTION	963	267	8.67165e-08	8.85231e-06	NOC2L:CAMTA1:EPHA2:PLA2G2A:AGO1:AGO3:JUN:MIER1:GADD45A:CYR61:GBP1:ARHGAP29:F3:LAMTOR5:RAP1A:RHOC:HIPK1:PRKAB2:MCL1:S100A12:S100A4:S100A13:HAX1:SHC1:ARHGEF2:ARHGAP30:ABL2:RGS2:PTPRC:ATP2B4:DSTYK:MAPKAPK2:TP53BP2:RHOU:OPTN:ARHGAP21:ARHGAP12:ITGB1:DDIT4:DNMBP:DUSP5:SHOC2:ADAM8:CD81:ILK:CAT:CD44:CREB3L1:ARHGAP1:RELA:AIP:ARAP1:MRE11A:BIRC2:CASP1:ATM:SIK2:CBL:SORL1:ITFG2:TNFRSF1A:PHB2:EPS8:KRAS:HDAC7:R…
GO_RESPONSE_TO_OXYGEN_CONTAINING_COMPOUND	784	224	8.87271e-08	8.93348e-06	GNB1:KIF1B:MTHFR:TNFRSF1B:WDTC1:PTAFR:JUN:PRKACB:VCAM1:LAMTOR5:RAP1A:SHC1:ADAM15:ARHGEF2:SELL:ABL2:RGS2:ATP2B4:MAPKAPK2:CAPN2:EGLN1:TOMM20:MTR:VIM:EIF4EBP2:DDIT4:SCD:NFKB2:PTPRE:BNIP3:SIGIRR:LDHA:CAT:RELA:CPT1A:CCND1:FOLR2:YAP1:BIRC2:CASP1:ATM:SIK2:CBL:ETS1:CD9:PHB2:EPS8:ITPR2:NR4A1:STAT6:LRP1:CDK4:RAP1B:OSBPL8:ATP2B1:DCN:SSH1:PEBP1:PXN:CAMKK2:HMGB1:FOXO1:COL4A1:GAS6:NFATC4:NFKBIA:HIF1A:MAX:ZFP36…
GO_REGULATION_OF_CELL_POPULATION_PROLIFERATION	756	217	9.78119e-08	9.7151e-06	SKI:CTNNBIP1:TNFRSF1B:PTAFR:AGO3:LEPRE1:SSBP3:TACSTD2:JUN:CYR61:F3:VCAM1:HIPK1:S100A11:S100A13:IL6R:SHC1:ARHGEF2:MNDA:PBX1:KIFAP3:ABL2:LAMC2:PTPRC:PTPN14:RNF187:HNRNPU-AS1:HNRNPU:ITGB1:ZMIZ1:IFIT3:CD81:CDKN1C:ILK:TP53I11:FTH1:RELA:CCND1:FOLR2:LRRC32:YAP1:BIRC2:ATM:ETS1:CCND2:CD9:PHB2:FOXJ2:KRAS:NR4A1:NCKAP1L:RNF41:STAT6:CDK4:NAP1L1:UTP20:KDM2B:HMGB1:FOXO1:RB1:RNASEH2B:SPRY2:EFNB2:TNFSF13B:TFDP1:G…
GO_POSITIVE_REGULATION_OF_LYMPHOCYTE_ACTIVATION	128	53	1.19445e-07	1.17056e-05	VCAM1:IL6R:PTPRC:ZMIZ1:ADAM8:CD81:NCKAP1L:STAT6:UNG:HMGB1:HSPH1:EFNB2:TNFSF13B:GAS6:IGHM:SOCS1:IL4R:CYLD:EXOSC6:LGALS9:CCL2:RARA:GRB2:MALT1:TYROBP:AXL:MSH2:DPP4:SLC39A10:INPP5D:SIRPA:NFATC2:LGALS1:TGFBR2:NFKBIZ:PIK3CA:WHSC1:IL6ST:PIK3R1:MEF2C:CD74:HLA-E:AIF1:HLA-DPA1:HLA-DPB1:FYN:RAC1:CAV1:FAM49B:SYK:TLR4:EFNB1:ATP11C
GO_SECRETION	800	227	1.32607e-07	1.28245e-05	DVL1:TNFRSF1B:PLA2G2A:PTAFR:PPIE:LEPRE1:GBP1:RAP1A:CD58:CTSS:S100A11:S100A12:S100A13:MNDA:TAGLN2:CD84:FCER1G:FCGR2A:FCGR3B:SELL:PTPRC:TMEM63A:SRGN:VCL:TSPAN14:ADAM8:AMPD3:SVIP:CAT:CD44:CREB3L1:FTH1:FERMT3:ARL2:CPT1A:CCND1:RAB6A:LRRC32:PRCP:SYTL2:CTSC:ENDOD1:CASP1:CBL:CD9:TNFRSF1A:SLC2A3:C3AR1:ITPR2:TM7SF3:ANO6:METTL7A:BIN2:NCKAP1L:LRP1:RAP1B:CEP290:LTA4H:GNPTAB:SLC15A4:HMGB1:TNFSF13B:GAS6:MIA2:CT…
GO_POSITIVE_REGULATION_OF_SIGNALING	897	250	1.50429e-07	1.43591e-05	DVL1:SKI:CAMTA1:PLA2G2A:ECE1:AGO1:AGO3:MACF1:JUN:MIER1:GADD45A:CYR61:F3:LAMTOR5:RAP1A:RHOC:MCL1:S100A12:S100A4:S100A13:HAX1:IL6R:SHC1:RUSC1:PTPRC:DSTYK:RAB7L1:MAPKAPK2:TP53BP2:ITGB1:ZMIZ1:TSPAN14:BLNK:DUSP5:SHOC2:BNIP3:ADAM8:CD81:CDKN1C:ILK:CAT:CD44:ARHGAP1:RELA:NUMA1:ARAP1:CTSC:YAP1:BIRC2:CASP1:ATM:DIXDC1:CBL:TNFRSF1A:PHB2:EPS8:KRAS:TM7SF3:LRP1:RAP1B:OSBPL8:DUSP6:DCN:SSH1:MAPKAPK5:PEBP1:HMGB1:LP…
GO_LEUKOCYTE_MEDIATED_IMMUNITY	434	136	1.58434e-07	1.49293e-05	TNFRSF1B:C1QA:C1QC:C1QB:PTAFR:PPIE:RAP1A:CD58:CTSS:S100A11:S100A12:S100A13:MNDA:CD84:FCER1G:FCGR2A:FCGR3B:SELL:PTPRC:TMEM63A:VCL:TSPAN14:ADAM8:CD81:AMPD3:SVIP:CAT:CD44:FTH1:RAB6A:PRCP:CTSC:CBL:C1S:SLC2A3:C3AR1:ANO6:METTL7A:BIN2:NCKAP1L:STAT6:RAP1B:CEP290:LTA4H:UNG:SLC15A4:HMGB1:PYGL:LGALS3:NPC2:IGHM:B2M:RAB27A:IL4R:MVP:STX4:EXOSC6:CRISPLD2:APRT:ARRB2:CD68:LGALS9:VAT1:TMC6:RAB31:ROCK1:MALT1:CFD:CN…
GO_POSITIVE_REGULATION_OF_CELL_CELL_ADHESION	116	49	1.71051e-07	1.59142e-05	PTAFR:VCAM1:IL6R:KIFAP3:PTPRC:ZMIZ1:ADAM8:CD44:RELA:ETS1:NCKAP1L:HMGB1:HSPH1:EFNB2:TNFSF13B:SOCS1:IL4R:CYLD:PIEZO1:LGALS9:CCL2:RARA:GRB2:MALT1:DPP4:ITGA6:SIRPA:LGALS1:TGFBR2:WNT5A:NFKBIZ:PIK3CA:MYO10:IL6ST:PIK3R1:CD74:HLA-E:FLOT1:AIF1:HLA-DPA1:HLA-DPB1:FYN:CITED2:RAC1:CAV1:FAM49B:SYK:EFNB1:IRAK1
GO_REGULATION_OF_CELL_MORPHOGENESIS	256	89	1.75694e-07	1.61419e-05	DVL1:AGO4:MACF1:TACSTD2:GBP1:RHOC:PLEKHO1:S100A10:S100A13:PLXNA2:RHOU:KIAA1598:PDZD8:ILK:PARVA:CD44:ARAP1:EPS8:LRP1:PLXNC1:SSH1:ZMYM2:NFATC4:FERMT2:LINC00341:SYNE3:MAP2K1:C15orf38:EEF2K:SSH2:CCL2:GNA13:STK11:MYADM:ITGB1BP1:ITSN2:CDC42EP3:RHOQ:ACTR2:LIMS1:TTL:ZEB2:RND3:BMPR2:STK25:HCK:PREX1:TIAM1:C21orf2:ITGB2:YWHAH:MYH9:CDC42EP1:PLXNB2:SS18L2:TWF2:WNT5A:PLXND1:WDR1:SLIT2:RUFY3:SHROOM3:SPP1:PPP3CA…
GO_RESPONSE_TO_TYPE_I_INTERFERON	52	28	1.88448e-07	1.70999e-05	ISG15:JAK1:GBP2:ADAR:IFIT2:IFIT3:IFITM2:IFITM3:STAT2:IFI27:XAF1:TYK2:BST2:SP100:MAVS:SAMHD1:IFNAR2:AP000295,9:IFNAR1:MYD88:SETD2:WNT5A:IRF2:IRF1:EGR1:HLA-A:HLA-E:HLA-B:IRAK1
GO_BLOOD_VESSEL_MORPHOGENESIS	309	103	2.09042e-07	1.86898e-05	EPHA2:AGO1:JUN:JAK1:LEPR:CYR61:F3:RAP1A:HIPK1:SHC1:ADAM15:EGLN1:ITGB1:ZMIZ1:ADAM8:PARVA:CREB3L1:PRCP:YAP1:MCAM:ETS1:ADIPOR2:FOXJ2:C3AR1:HDAC7:NR4A1:LRP1:DCN:ELK3:SPRY2:EFNB2:COL4A1:COL4A2:NFATC4:HIF1A:ZFP36L1:WARS:TNFAIP2:SLC12A6:SPRED1:THBS1:PML:MFGE8:PRKCB:EPN2:CCL2:STAT3:PLCD3:MAP3K3:GNA13:ROCK1:JUNB:KLF2:PAK4:HIF3A:BAX:RRAS:ITGB1BP1:ROCK2:CYP1B1:HS6ST1:ATF2:COL3A1:BMPR2:NRP2:SP100:POFUT1:ITGB…
GO_LEUKOCYTE_CELL_CELL_ADHESION	157	61	2.11819e-07	1.86898e-05	PTAFR:VCAM1:IL6R:SELL:PTPRC:ITGB1:ZMIZ1:ADAM8:CD44:FERMT3:RELA:LRRC32:ETS1:NCKAP1L:HMGB1:HSPH1:EFNB2:TNFSF13B:LGALS3:SOCS1:IL4R:CYLD:LGALS9:CCL2:RARA:GRB2:ROCK1:MALT1:DPP4:SIRPA:SDC4:ITGB2:RAC2:LGALS1:PPARA:TGFBR2:NFKBIZ:PIK3CA:IL6ST:PIK3R1:IRF1:CD74:TNIP1:DUSP22:HLA-E:AIF1:HLA-DPA1:HLA-DPB1:TNFRSF21:FYN:RAC1:CAV1:PAG1:FAM49B:SEMA4D:SYK:CERCAM:MSN:VSIG4:EFNB1:IRAK1
GO_CELLULAR_RESPONSE_TO_OXYGEN_CONTAINING_COMPOUND	563	168	2.13598e-07	1.86898e-05	GNB1:TNFRSF1B:WDTC1:PTAFR:JUN:PRKACB:VCAM1:LAMTOR5:RAP1A:SHC1:ADAM15:ARHGEF2:ABL2:ATP2B4:CAPN2:MTR:VIM:EIF4EBP2:DDIT4:PTPRE:BNIP3:SIGIRR:RELA:CPT1A:FOLR2:YAP1:CASP1:ATM:SIK2:ETS1:PHB2:ITPR2:NR4A1:STAT6:LRP1:CDK4:RAP1B:OSBPL8:ATP2B1:SSH1:PXN:CAMKK2:HMGB1:FOXO1:COL4A1:GAS6:NFATC4:NFKBIA:HIF1A:MAX:ZFP36L1:FOS:FBLN5:FBN1:RAB8B:IREB2:IGF1R:SOCS1:EEF2K:PRKCB:MAPK3:STX4:APRT:CD68:KDM6B:CCL2:RARA:STAT3:N…
GO_POSITIVE_REGULATION_OF_KINASE_ACTIVITY	302	101	2.29668e-07	1.98595e-05	GADD45A:PRKACB:CYR61:RAP1A:S100A12:IL6R:SHC1:PTPRC:ATP2B4:DSTYK:MAPKAPK2:CCNY:DUSP5:ADAM8:CD81:ILK:CCND1:MRE11A:CCND2:KRAS:NCKAP1L:OSBPL8:DUSP6:MAPKAPK5:GCN1L1:SPRY2:GAS6:MAP4K5:THBS1:MAP2K1:PKD1:TRAF7:SOCS1:MAPK3:UNC119:SPAG9:MAP3K3:MALT1:STK11:GADD45B:S1PR2:PRKACA:PAK4:CALM3:FPR1:ITGB1BP1:EIF2AK2:CALM2:CCDC88A:MAP4K4:CXCR4:ZEB2:MLTK:CCNYL1:SLC11A1:CAB39:COPS8:STK25:CDC25B:BMP2:SDC4:TIAM1:ITSN1:…
GO_REGULATION_OF_ACTIN_FILAMENT_ORGANIZATION	154	60	2.37685e-07	2.03137e-05	TACSTD2:CAPZA1:RHOC:S100A10:HAX1:ADD3:ARAP1:FCHSD2:EPS8:NCKAP1L:SSH1:PXN:CFL2:EVL:TMOD3:SMAD3:C15orf38:FHOD1:PFN1:SSH2:GRB2:ROCK1:GMFG:VASP:MYADM:ITGB1BP1:ROCK2:CDC42EP3:SPTBN1:ACTR2:PLEK:CAPG:CLASP1:WIPF1:HCK:SDC4:PREX1:CDC42EP1:TWF2:PRKCD:HCLS1:ADD1:WDR1:SLIT2:SYNPO2:PIK3R1:FER:FCHSD1:LRRC16A:ARHGAP18:CTGF:RAC1:PPP1R9A:ARPC1B:CAPZA2:PTK2B:SPTAN1:ABL1:WAS:FLNA
GO_POSITIVE_REGULATION_OF_RESPONSE_TO_EXTERNAL_STIMULUS	124	51	2.65783e-07	2.24541e-05	PLA2G2A:C1QA:F3:S100A12:IL6R:FCER1G:OPTN:ADAM8:ETS1:TNFRSF1A:C3AR1:ANO6:NCKAP1L:LRP1:CMKLR1:HMGB1:GAS6:NFKBIA:THBS1:SMAD3:MAPK3:STX4:LGALS9:LDLR:IL1RL1:BMPR2:APP:TIAM1:ITGB2:IL17RA:RAC2:MYD88:OXSR1:CCR1:WNT5A:APPL1:NFKBIZ:SLIT2:IL6ST:CD74:TNIP1:EDN1:HLA-E:AIF1:MAPK14:VEGFA:RAC1:NAPEPLD:PTK2B:JAK2:TLR4
GO_REGULATION_OF_LEUKOCYTE_DIFFERENTIATION	128	52	3.24343e-07	2.709e-05	CTNNBIP1:C1QC:JUN:HAX1:PTPRC:SOX13:ZMIZ1:ADAM8:NCKAP1L:RNF41:HMGB1:RB1:GAS6:ZFP36L1:FOS:FBN1:SOCS1:IL4R:CYLD:LGALS9:EVI2B:RARA:NME1:MALT1:TYROBP:AXL:ID2:ZFP36L2:CREB1:INPP5D:MAFB:NFATC2:TGFBR2:CCR1:FOXP1:NFKBIZ:HCLS1:SH3RF1:PIK3R1:IRF1:CD74:PRELID1:RIPK1:CDK6:TMEM176B:TRIB1:MYC:SYK:TLR4:ABL1:TFE3:ATP11C
GO_REGULATION_OF_ANATOMICAL_STRUCTURE_SIZE	241	84	3.4491e-07	2.84841e-05	ECE1:WDTC1:PTAFR:MACF1:LAMTOR5:CAPZA1:HAX1:RGS2:ACTA2:ADD3:KIAA1598:ILK:FCHSD2:EPS8:ANO6:NCKAP1L:LRP1:CDK4:SSH1:CFL2:EVL:SLC12A6:TMOD3:C15orf38:PFN1:SSH2:SNF8:GRB2:ROCK1:GMFG:VASP:PPP1R15A:AKT1S1:MYADM:ITGB1BP1:ROCK2:CDC42EP3:SLC8A1:SPTBN1:ACTR2:PLEK:CAPG:TTL:WIPF1:BMPR2:CREB1:HCK:PREX1:RAB22A:HMOX1:CDC42EP1:TWF2:PRKCD:WNT5A:HCLS1:ADD1:WDR1:SLIT2:RUFY3:SPP1:ITGA1:MAP1B:FER:SLC12A2:FCHSD1:LARS:FOX…
GO_CELL_CHEMOTAXIS	115	48	3.51995e-07	2.87463e-05	EPHA2:VCAM1:S100A12:IL6R:FCER1G:ADAM8:PARVA:C3AR1:ANO6:BIN2:NR4A1:NCKAP1L:CMKLR1:HMGB1:GAS6:LGALS3:THBS1:MAPK3:CKLF:ARRB2:LGALS9:CCL2:PIP5K1C:CXCR4:PREX1:TIAM1:ITGB2:IL17RA:RAC2:OXSR1:CCR1:PRKCD:WNT5A:SLIT2:PDGFRA:HMGB2:ITGA1:PDE4D:SLC12A2:CD74:EDN1:AIF1:MAPK14:VEGFA:RAC1:PTK2B:SYK:NOTCH1
GO_POSITIVE_REGULATION_OF_LEUKOCYTE_DIFFERENTIATION	68	33	3.92965e-07	3.17395e-05	CTNNBIP1:JUN:HAX1:PTPRC:ZMIZ1:ADAM8:NCKAP1L:HMGB1:RB1:GAS6:ZFP36L1:FOS:SOCS1:IL4R:CYLD:LGALS9:EVI2B:RARA:MALT1:TYROBP:AXL:ID2:CREB1:INPP5D:TGFBR2:CCR1:NFKBIZ:HCLS1:CD74:RIPK1:TRIB1:SYK:ATP11C
GO_ADAPTIVE_IMMUNE_RESPONSE_BASED_ON_SOMATIC_RECOMBINATION_OF_IMMUNE_RECEPTORS_BUILT_FROM_IMMUNOGLOBULIN_SUPERFAMILY_DOMAINS	106	45	4.56783e-07	3.6493e-05	TNFRSF1B:C1QA:C1QC:C1QB:IL6R:FCER1G:PTPRC:NFKB2:CD81:CTSC:C1S:STAT6:UNG:HMGB1:TNFSF13B:IGHM:B2M:RAB27A:IL4R:EXOSC6:STAT3:MALT1:POU2F2:PVR:BCL3:MSH2:IL1RL1:SLC11A1:INPP5D:PRKCD:NFKBIZ:RNF168:WHSC1:MEF2C:CD74:DUSP22:HLA-A:HLA-E:GNL1:HLA-B:TNFAIP3:NBN:FAM49B:TLR4:WAS
GO_RESPONSE_TO_ENDOGENOUS_STIMULUS	825	230	5.05048e-07	3.99151e-05	GNB1:SKI:KIF1B:WDTC1:PTAFR:JUN:LEPR:PRKACB:CYR61:VCAM1:LAMTOR5:RAP1A:CTSS:SHC1:ARHGEF2:FCER1G:ATP2B4:DSTYK:CAPN2:TOMM20:HNRNPU-AS1:HNRNPU:VIM:ITGB1:UBE2D1:EIF4EBP2:DDIT4:SHOC2:PTPRE:POLR2L:CD81:CDKN1C:ILK:CAT:CD44:CRY2:CREB3L1:MDK:FAM89B:RELA:CCND1:NUMA1:FOLR2:LRRC32:PRCP:YAP1:SIK2:ZNF259:CBL:ETS1:ADIPOR2:CD9:PHB2:KRAS:ITPR2:NR4A1:CALCOCO1:HNRNPA1:LRP1:CDK4:RAP1B:OSBPL8:ATP2B1:SSH1:PEBP1:PXN:NCOR…
GO_POSITIVE_REGULATION_OF_MAPK_CASCADE	243	84	5.14551e-07	3.99504e-05	PLA2G2A:JUN:GADD45A:RAP1A:S100A12:SHC1:PTPRC:DSTYK:MAPKAPK2:DUSP5:ADAM8:CD81:ILK:CD44:PHB2:KRAS:LRP1:RAP1B:DUSP6:MAPKAPK5:HMGB1:SPRY2:GAS6:MAP4K5:THBS1:MAP2K1:NPTN:IGF1R:TRAF7:MAPK3:ARRB2:KSR1:LGALS9:CCL2:IGFBP4:SPAG9:MAP3K3:ROCK1:GADD45B:S1PR2:FPR1:ROCK2:EIF2AK2:CXCR4:ZEB2:MLTK:CFLAR:STK25:BMP2:APP:TIAM1:MAPK1:CCR1:GNAI2:WNT5A:PDGFRA:SH3RF1:ITGA1:MAP3K1:PJA2:CD74:NDST1:DUSP22:RIPK1:EDN1:MAPK14:V…
GO_AXON_DEVELOPMENT	232	81	5.16366e-07	3.99504e-05	DVL1:EPHA2:LYPLA2:MACF1:JUN:NEXN:SHC1:PLXNA2:ENAH:MTR:ITGB1:VCL:KIAA1598:ILK:B3GNT1:TSKU:ZNF259:LRP1:PLXNC1:SSH1:EFNB2:NUMB:EVL:NDN:MAP2K1:NPTN:MAPK3:CDH11:SSH2:GRB2:STK11:VASP:RAB10:SPTBN1:B3GNT2:TTL:CXCR4:ZEB2:BMPR2:NRP2:KLF7:CREB1:GPC1:STK25:PTPRA:APP:TIAM1:MAPK1:RAC2:TSPO:PLXNB2:TWF2:WNT5A:ALCAM:PLXND1:PIK3CA:SLIT2:RUFY3:SPP1:PALLD:EMB:ZSWIM6:PIK3R1:MAP1B:CYFIP2:PDLIM7:FLOT1:VEGFA:TNFRSF21:FY…
GO_CELL_ACTIVATION_INVOLVED_IN_IMMUNE_RESPONSE	407	127	5.37911e-07	4.10658e-05	TNFRSF1B:PTAFR:PPIE:RAP1A:CD58:CTSS:S100A11:S100A12:S100A13:MNDA:CD84:FCER1G:FCGR2A:FCGR3B:SELL:PTPRC:TMEM63A:VCL:TSPAN14:ADAM8:AMPD3:SVIP:CAT:CD44:FTH1:RAB6A:PRCP:CTSC:CBL:ITFG2:SLC2A3:C3AR1:ANO6:METTL7A:BIN2:NCKAP1L:STAT6:LRP1:RAP1B:CEP290:LTA4H:UNG:SLC15A4:HMGB1:PYGL:LGALS3:NPC2:EIF2AK4:B2M:RAB27A:IL4R:MVP:STX4:EXOSC6:CRISPLD2:APRT:CD68:LGALS9:RARA:STAT3:VAT1:TMC6:RAB31:ROCK1:MALT1:CFD:CNN2:SB…
GO_LEUKOCYTE_CHEMOTAXIS	81	37	5.41957e-07	4.10658e-05	S100A12:IL6R:FCER1G:ADAM8:C3AR1:ANO6:NCKAP1L:CMKLR1:HMGB1:GAS6:LGALS3:THBS1:MAPK3:CKLF:LGALS9:CCL2:PIP5K1C:CXCR4:PREX1:ITGB2:IL17RA:RAC2:OXSR1:CCR1:WNT5A:SLIT2:ITGA1:PDE4D:SLC12A2:CD74:EDN1:AIF1:MAPK14:VEGFA:RAC1:PTK2B:SYK
GO_POSITIVE_REGULATION_OF_LOCOMOTION	300	99	6.15101e-07	4.61326e-05	PTAFR:JUN:CYR61:F3:RHOC:IL6R:ARHGEF2:LAMC2:PTPRC:KIAA1598:ADAM8:CD151:ILK:FERMT3:FAM89B:ATM:MCAM:ETS1:C3AR1:ANO6:HDAC7:NCKAP1L:LRP1:CMKLR1:SSH1:HMGB1:SPRY2:GAS6:LGALS3:HIF1A:NUMB:THBS1:SMAD3:IGF1R:MAPK3:STX4:PFN1:ELP5:LGALS9:STAT3:PTRF:COL1A1:SPAG9:MAP3K3:SMURF2:MAPRE2:GPI:MYADM:ITGB1BP1:ROCK2:SLC8A1:MAP4K4:CLASP1:ITGA6:BMPR2:NRP2:BMP2:PREX1:APP:ADAMTS1:TIAM1:MAPK1:HMOX1:RAC2:TGFBR2:OXSR1:CCR1:GN…
GO_REGULATION_OF_MAPK_CASCADE	350	112	6.51254e-07	4.83507e-05	EPHA2:PLA2G2A:JUN:GADD45A:CYR61:GBP1:RAP1A:S100A12:SHC1:RGS2:PTPRC:DSTYK:MAPKAPK2:DUSP5:ADAM8:CD81:ILK:CD44:SORL1:PHB2:KRAS:RNF41:LRP1:RAP1B:DUSP6:MAPKAPK5:PEBP1:HMGB1:FOXO1:SPRY2:GAS6:MAP4K5:STYX:SPRED1:THBS1:MAP2K1:NPTN:IGF1R:TRAF7:MAPK3:CYLD:ARRB2:PER1:KSR1:LGALS9:CCL2:IGFBP4:SPAG9:MAP3K3:GRB2:ROCK1:GADD45B:S1PR2:PAK4:RRAS:NUP62:FPR1:ITGB1BP1:ROCK2:EIF2AK2:VRK2:RNF149:MAP4K4:CXCR4:ZEB2:MLTK:CF…
GO_REGULATION_OF_BODY_FLUID_LEVELS	237	82	6.7414e-07	4.95493e-05	GNB1:PRKACB:F3:CAPZA1:FCER1G:JMJD1C:VCL:PAPSS2:ILK:HPS5:PHF21A:FERMT3:CCND1:PRCP:SYTL2:CD9:ITPR2:ANO6:DGKH:GAS6:HIF1A:THBS1:RAB27A:PRKCB:SH2B1:MAPK3:VKORC1:GOT2:APRT:ARRB2:COL1A1:NME1:GNA13:PRKACA:GPI:AXL:PLAUR:NCOA1:PLEK:MERTK:KIAA1715:COL3A1:CREB1:DGKD:MYL9:MAPK1:HPS4:MYH9:ITPR1:ZFYVE20:PRKAR2A:GNAI2:PRKCD:HEG1:PLSCR1:RAP2B:PIK3CA:PDGFRA:METAP1:IRF2:PIK3R1:IRF1:LCP2:EDN1:LRRC16A:VEGFA:SLC29A1:F…
GO_ENZYME_LINKED_RECEPTOR_PROTEIN_SIGNALING_PATHWAY	556	164	6.81486e-07	4.95933e-05	SKI:EPHA2:JUN:CYR61:F3:APH1A:SHC1:MPZL1:ANGPTL1:NCF2:DSTYK:MAPKAPK2:VIM:UBE2D1:EIF4EBP2:DDIT4:MYOF:BLNK:SHOC2:PTPRE:POLR2L:CDKN1C:ILK:CREB3L1:FAM89B:RELA:NUMA1:ARAP1:LRRC32:SIK2:CBL:EPS8:HNRNPA1:NCKAP1L:LRP1:CDK4:OSBPL8:DCN:PXN:FOXO1:SPRY2:EFNB2:COL4A1:COL4A2:GAS6:NFATC4:FERMT2:HIF1A:LTBP2:FOS:NDN:SPRED1:THBS1:FBN1:SMAD3:NPTN:PML:IGF1R:VASN:SOCS1:PRKCB:SH2B1:MVP:MAPK3:NUP93:ARRB2:POLR2A:EPN2:IGFB…
GO_MYELOID_LEUKOCYTE_DIFFERENTIATION	101	43	7.4592e-07	5.37501e-05	CTNNBIP1:EPHA2:C1QC:JUN:HAX1:IFI16:FCER1G:LBR:RB1:ZFP36L1:FOS:FBN1:IREB2:LRRK1:EVI2B:RARA:NME1:SBNO2:JUNB:TYROBP:ID2:CREB1:INPP5D:MAFB:APP:THOC5:MYH9:TGFBR2:CCR1:FOXP1:HCLS1:RBPJ:PIK3R1:MEF2C:CD74:RIPK1:MAPK14:VEGFA:CDK6:TRIB1:MYC:TLR4:TFE3
GO_POSITIVE_REGULATION_OF_LEUKOCYTE_CELL_CELL_ADHESION	98	42	8.08095e-07	5.7665e-05	PTAFR:VCAM1:IL6R:PTPRC:ZMIZ1:ADAM8:CD44:RELA:ETS1:NCKAP1L:HMGB1:HSPH1:EFNB2:TNFSF13B:SOCS1:IL4R:CYLD:LGALS9:CCL2:RARA:GRB2:MALT1:DPP4:SIRPA:LGALS1:TGFBR2:NFKBIZ:PIK3CA:IL6ST:PIK3R1:CD74:HLA-E:AIF1:HLA-DPA1:HLA-DPB1:FYN:RAC1:CAV1:FAM49B:SYK:EFNB1:IRAK1
GO_RESPONSE_TO_MOLECULE_OF_BACTERIAL_ORIGIN	145	56	8.34029e-07	5.89434e-05	TNFRSF1B:PTAFR:JUN:VCAM1:MAPKAPK2:CAPN2:VIM:NFKB2:SIGIRR:RELA:CASP1:CDK4:DCN:HMGB1:NFKBIA:FOS:B2M:LOXL1:MAPK3:CD68:LGALS9:CCL2:RARA:MALT1:SBNO2:JUNB:ZFP36:AXL:CARD8:SLC11A1:SIRPA:HCK:IFNAR1:MAPK1:TSPO:WNT5A:FOXP1:HMGB2:PDE4D:MEF2C:FER:SPARC:EDN1:MAPK14:TNFAIP3:ADAM9:MTDH:TRIB1:HSF1:JAK2:ALAD:TLR4:ABL1:NOTCH1:RPS6KA3:IRAK1
GO_RESPONSE_TO_NITROGEN_COMPOUND	498	149	9.20934e-07	6.44654e-05	GNB1:MTHFR:WDTC1:PTAFR:JUN:PRKACB:VCAM1:LAMTOR5:RAP1A:SHC1:ARHGEF2:FCER1G:SELL:RGS2:ATP2B4:CAPN2:EGLN1:TOMM20:MTR:VIM:ITGB1:EIF4EBP2:PTPRE:CD81:LDHA:CAT:RELA:CCND1:FOLR2:BIRC2:SIK2:NNMT:CD9:ITPR2:NR4A1:STAT6:LRP1:CDK4:RAP1B:OSBPL8:SSH1:PEBP1:PXN:FOXO1:COL4A1:NFKBIA:MAX:ZFP36L1:FOS:FBN1:RAB8B:IREB2:IGF1R:SOCS1:EEF2K:PRKCB:MAPK3:GOT2:APRT:CD68:PER1:STAT3:COL1A1:NME1:GRB2:SOCS3:RAB31:ROCK1:RIOK3:PIK…
GO_LYMPHOCYTE_DIFFERENTIATION	149	57	9.59314e-07	6.65185e-05	LEPR:VCAM1:FCER1G:PTPRC:SOX13:KLF6:ITGB1:ZMIZ1:BLNK:ADAM8:ATM:ITFG2:NCKAP1L:RNF41:STAT6:HMGB1:GAS6:ZFP36L1:B2M:SOCS1:IL4R:CYLD:LGALS9:RARA:STAT3:MALT1:STK11:TCF3:AXL:POU2F2:BCL3:BAX:ID2:ZFP36L2:MSH2:MERTK:INPP5D:MAFB:PREX1:NFATC2:LGALS1:TGFBR2:FOXP1:NFKBIZ:RBPJ:SH3RF1:PIK3R1:IRF1:EGR1:CD74:PRELID1:POLM:CDK6:PTK2B:SYK:ABL1:ATP11C
GO_ACTIVATION_OF_IMMUNE_RESPONSE	315	102	1.13057e-06	7.76607e-05	C1QA:C1QC:C1QB:PRKACB:GBP1:RAP1A:CTSS:MNDA:IFI16:FCER1G:FCGR2A:FCGR3A:PTPRC:RAB7L1:MAPKAPK2:UBE2D1:CD81:RELA:BIRC2:C1S:C3AR1:KRAS:NCKAP1L:CMKLR1:HMGB1:NFKBIA:LGALS3:IGHM:PRKCB:MAPK3:CYLD:CMTM3:ARRB2:GRB2:SEC14L1:RIOK3:PIK3C3:MALT1:CFD:STK11:PRKACA:BAX:FPR1:PSME4:ACTR2:WIPF1:SLC39A10:INPP5D:MAVS:HCK:NFATC2:ITGB2:MAPK1:MYD88:PRKCD:APPL1:FOXP1:NFKBIZ:PLSCR1:PIK3CA:ALPK1:MYO10:FYB:MAP3K1:PDE4D:PIK3R1…
GO_GRANULOCYTE_MIGRATION	47	25	1.16106e-06	7.90163e-05	S100A12:FCER1G:ADAM8:C3AR1:NCKAP1L:CMKLR1:LGALS3:THBS1:MAPK3:CKLF:CCL2:PIP5K1C:PREX1:ITGB2:IL17RA:RAC2:WDR1:SLIT2:ITGA1:PDE4D:CD74:EDN1:MAPK14:RAC1:SYK
GO_POSITIVE_REGULATION_OF_HEMOPOIESIS	96	41	1.21747e-06	8.20956e-05	ISG15:CTNNBIP1:JUN:HAX1:PTPRC:ZMIZ1:ADAM8:ETS1:NCKAP1L:HMGB1:RB1:GAS6:HIF1A:ZFP36L1:FOS:SOCS1:IL4R:CYLD:LGALS9:EVI2B:RARA:STAT3:MALT1:TYROBP:AXL:ID2:ACVR2A:CREB1:INPP5D:TGFBR2:CCR1:NFKBIZ:HCLS1:HMGB2:CD74:FOXC1:RIPK1:MAPK14:TRIB1:SYK:ATP11C
GO_REGULATION_OF_SUPRAMOLECULAR_FIBER_ORGANIZATION	204	72	1.4003e-06	9.34976e-05	TACSTD2:CAPZA1:RHOC:S100A10:HAX1:ARHGEF2:ADD3:ARL2:NUMA1:ARAP1:FCHSD2:EPS8:NCKAP1L:SSH1:PXN:RB1:CFL2:EVL:TMOD3:SMAD3:C15orf38:FHOD1:PFN1:SSH2:GRB2:ROCK1:LDLR:GMFG:VASP:MYADM:ITGB1BP1:ROCK2:CDC42EP3:SPTBN1:ACTR2:PLEK:CAPG:CLASP1:WIPF1:HCK:SDC4:PREX1:APP:CDC42EP1:TWF2:PRKCD:HCLS1:ADD1:WDR1:SLIT2:SYNPO2:PIK3R1:MAP1B:MEF2C:FER:APC:FCHSD1:EDN1:LRRC16A:ARHGAP18:CTGF:RAC1:PPP1R9A:ARPC1B:CAPZA2:PTK2B:CDK…
GO_POSITIVE_REGULATION_OF_PROTEIN_MODIFICATION_PROCESS	615	177	1.412e-06	9.34976e-05	DVL1:CAMTA1:PLA2G2A:JUN:GADD45A:PRKACB:CYR61:RAP1A:S100A12:HAX1:IL6R:SHC1:ARHGEF2:FAM129A:PTPRC:ATP2B4:DSTYK:MAPKAPK2:PPP2R5A:CCNY:UBE2D1:DUSP5:ADAM8:CD81:ILK:SVIP:CD44:RPS6KA4:CCND1:MRE11A:BIRC2:ATM:KMT2A:CCND2:TNFRSF1A:PHB2:KRAS:NCKAP1L:LRP1:RAP1B:OSBPL8:DUSP6:MAPKAPK5:CAMKK2:HMGB1:SPRY2:GAS6:MAP4K5:THBS1:EHD4:MAP2K1:PIAS1:NPTN:IGF1R:LRRK1:PKD1:TRAF7:SOCS1:DCUN1D3:MAPK3:ARL2BP:ARRB2:KSR1:LGALS9…
GO_LEUKOCYTE_PROLIFERATION	113	46	1.43788e-06	9.43607e-05	TNFRSF1B:VCAM1:IL6R:MNDA:PTPRC:CD151:CD81:LRRC32:ATM:NCKAP1L:HMGB1:TNFSF13B:LGALS3:LGALS9:MALT1:TYROBP:BAX:SLC39A10:SLC11A1:INPP5D:SDC4:NFATC2:RAC2:TGFBR2:PRKCD:SH3RF1:IL6ST:MEF2C:IRF1:CD74:HLA-E:LST1:AIF1:HLA-DPA1:HLA-DPB1:CCND3:TNFRSF21:FYN:TNFAIP3:SYK:TLR4:ABL1:MSN:VSIG4:EFNB1:ELF4
GO_REGULATION_OF_BIOMINERAL_TISSUE_DEVELOPMENT	42	23	1.59155e-06	0.000103521	ISG15:CYR61:SRGN:MGP:ANO6:GAS6:HIF1A:SMAD3:FAM101B:ROCK1:ROCK2:SLC8A1:ACVR2A:BMPR2:BMP2:CCR1:BMP2K:ANKH:MEF2C:ENPP1:PTK2B:NOTCH1:BCOR
GO_APOPTOTIC_PROCESS	1045	279	1.65231e-06	0.00010653	NOC2L:GNB1:KIF1B:DFFA:TNFRSF1B:EPHA2:EYA3:YARS:AGO4:JUN:GADD45A:CYR61:SH3GLB1:PKN2:F3:LAMTOR5:HIPK1:APH1A:MCL1:HAX1:IL6R:SHC1:ARHGEF2:MNDA:IFI16:FCER1G:KIFAP3:PTPRC:DSTYK:CAPN2:TP53BP2:ITGB1:SRGN:DDIT4:IFIT2:IFIT3:BLOC1S2:BNIP3:ADAM8:RRP8:ILK:MTRNR2L8:LDHA:CAT:CD44:API5:CREB3L1:MDK:RELA:CTSC:MRE11A:YAP1:BIRC2:CASP1:ATM:ZNF259:KMT2A:CBL:CCND2:TNFRSF1A:PHB2:ETV6:KRAS:ANO6:NCKAP1L:RNF41:LRP1:CDK4:RA…
GO_RESPONSE_TO_LIPID	439	133	1.75531e-06	0.000112187	GNB1:TNFRSF1B:PTAFR:JUN:VCAM1:ADAM15:ABL2:MAPKAPK2:CAPN2:HNRNPU-AS1:HNRNPU:VIM:DDIT4:SCD:NFKB2:SIGIRR:CAT:CRY2:MDK:RELA:CPT1A:CCND1:YAP1:CASP1:ATM:CBL:ETS1:PHB2:KRAS:NR4A1:CALCOCO1:CDK4:ATP2B1:DCN:PEBP1:NCOR2:HMGB1:FOXO1:RB1:NFATC4:NFKBIA:ZFP36L1:FOS:THBS1:PIAS1:LOXL1:IREB2:ABHD2:MAPK3:ARRB2:CD68:PER1:LGALS9:CCL2:RARA:STAT3:NFE2L1:COL1A1:NME1:DDX5:DSG2:MALT1:SBNO2:LDLR:KANK2:JUNB:GPI:ZFP36:AXL:FO…
GO_NEURON_DEATH	187	67	1.77172e-06	0.00011226	C1QA:JUN:MCL1:RAB7L1:CAPN2:TP53BP2:EGLN1:DDIT4:BNIP3:ADAM8:ILK:MDK:ATM:ZNF259:CBL:SORL1:KRAS:LRP1:SSH1:KDM2B:RILPL1:RB1:EFNB2:NFATC4:HIF1A:MAX:FOS:ARRB2:CCL2:STAT3:ROCK1:GPI:TYROBP:AXL:BAX:AKT1S1:MSH2:REL:ATF2:CREB1:LANCL1:CTSZ:APP:ITSN1:ITGB2:HMOX1:PPARA:THRB:WNT5A:PIK3CA:FAM134B:ITGA1:MEF2C:EGR1:TNFRSF21:FYN:NCOA7:MAP3K5:SOD2:NAMPT:HIPK2:PTK2B:HSF1:JAK2:TLR4:ABL1:NONO
GO_POSITIVE_REGULATION_OF_CYTOKINE_BIOSYNTHETIC_PROCESS	24	16	1.79693e-06	0.000112884	PTAFR:PTPRC:MAPKAPK2:RELA:THBS1:STAT3:TYROBP:BCL3:APP:HMOX1:WNT5A:IRF1:EGR1:SYK:TLR4:CYBB
GO_REGULATION_OF_OSSIFICATION	94	40	1.83278e-06	0.000114161	ISG15:SKI:CTNNBIP1:CYR61:IL6R:PBX1:SRGN:ILK:MGP:ANO6:HDAC7:HIF1A:SMAD3:MAPK3:FAM101B:DDX5:PRKACA:ID2:SLC8A1:ACVR2A:BMPR2:BMP2:MAPK1:CCR1:WNT5A:RBPJ:BMP2K:ANKH:IL6ST:MEF2C:PDLIM7:ID4:MAPK14:ENPP1:CDK6:PTK2B:CTHRC1:SEMA4D:NOTCH1:BCOR
GO_CONNECTIVE_TISSUE_DEVELOPMENT	121	48	2.06734e-06	0.000127415	CYR61:IL6R:THBS3:ACTA2:CD44:RELA:SERPINH1:MGP:CDK4:LUM:HIF1A:SPTLC2:SMAD3:PKD1:MAPK3:MAF:FAM101B:RARA:COL1A1:ID2:ATF2:KIAA1715:CFLAR:BMPR2:KLF7:COL6A3:BMP2:COL6A1:COL6A2:SELM:TGFBR2:COL7A1:WNT5A:PIK3CA:MEF2C:TGFBI:EGR1:EDN1:ID4:MAPK14:CTGF:LOXL2:SCARA3:MATN2:COL27A1:COL5A1:NOTCH1:TIMP1
GO_INTERLEUKIN_1_PRODUCTION	37	21	2.08024e-06	0.000127415	S100A13:IFI16:MR1:CASP1:HMGB1:GAS6:SMAD3:PML:ARRB2:LGALS9:TYROBP:CARD8:IL1R2:SIRPA:APP:WNT5A:FOXP1:EGR1:TNFAIP3:JAK2:TLR4
GO_IMPORT_INTO_CELL	351	110	2.52691e-06	0.000153494	FNBP1L:PI4KB:FCER1G:ATP1B1:ABL2:RGS2:ATP2B4:MAPKAPK2:RHOU:ARHGAP12:ITGB1:CD151:CD81:FOLR2:FCHSD2:MTMR2:CBL:SORL1:CD9:CD163:ANO6:BIN2:NCKAP1L:LRP1:HSPH1:EFNB2:LGALS3:NUMB:IGHM:SLC12A6:THBS1:EHD4:B2M:SNX1:MFGE8:EEF2K:MAPK3:ARRB2:EPN2:UNC119:ARHGAP27:NME1:GRB2:LGALS3BP:RAB31:ROCK1:PIK3C3:PIP5K1C:SH3GL1:MARCH2:LDLR:EPS15L1:AXL:APOC1:CALM3:SLC1A5:ITSN2:SLC8A1:RHOQ:EHBP1:WIPF1:SLC39A10:ACSL3:DGKD:SNX5:…
GO_REGULATION_OF_KINASE_ACTIVITY	466	139	2.62404e-06	0.000158088	DVL1:GADD45A:PRKACB:CYR61:RAP1A:S100A12:IL6R:ADAR:SHC1:RGS2:PTPRC:ATP2B4:DSTYK:MAPKAPK2:PPP2R5A:HNRNPU-AS1:HNRNPU:CCNY:DUSP5:ADAM8:CD81:CDKN1C:ILK:CCND1:MRE11A:CBL:SORL1:CCND2:KRAS:NCKAP1L:CDK4:OSBPL8:DUSP6:MAPKAPK5:GCN1L1:CAMKK2:RB1:SPRY2:GAS6:MAP4K5:C14orf166:WARS:SPRED1:THBS1:MAP2K1:IGF1R:PKD1:TRAF7:SOCS1:MVP:MAPK3:RBL2:SMCR8:KSR1:UNC119:SPAG9:MAP3K3:SOCS3:MALT1:STK11:GADD45B:S1PR2:PRKACA:PAK4…
GO_CELL_JUNCTION_ASSEMBLY	150	56	2.92201e-06	0.000174608	EPHA2:MACF1:PKN2:RAP1A:CAPZA1:RHOC:HIPK1:S100A10:LAMC2:VCL:COL17A1:CD151:ILK:ARL2:CD9:HDAC7:LRP1:RAP1B:FERMT2:ACTN1:THBS1:SMAD3:CDH11:VMP1:ROCK1:LAMA3:PIP5K1C:PRKACA:VASP:ITGB1BP1:ROCK2:MAP4K4:LIMS1:CLASP1:LIMS2:ITGA6:TNS1:SDC4:HEG1:WDR1:APC:DUSP22:FLOT1:VEGFA:DST:GJA1:ACTB:FSCN1:RAC1:CAV1:PTK2B:MTDH:PLEC:TLN1:ABL1:FLNA
GO_REGULATION_OF_HEMOPOIESIS	257	85	3.4886e-06	0.000206589	ISG15:CTNNBIP1:C1QC:AGO4:AGO1:AGO3:JUN:HAX1:PTPRC:SOX13:RBBP5:ZMIZ1:ADAM8:YAP1:KMT2A:ETS1:NCKAP1L:RNF41:HMGB1:RB1:GAS6:NFKBIA:LGALS3:HIF1A:ZFP36L1:FOS:KLF13:MEIS2:THBS1:B2M:FBN1:SOCS1:PRKCB:IL4R:CYLD:LGALS9:EVI2B:RARA:STAT3:NME1:MALT1:TCF3:TYROBP:ZFP36:AXL:ID2:EIF2AK2:ZFP36L2:PSME4:ACVR2A:CREB1:INPP5D:MYL9:MAFB:NFATC2:RBFOX2:TNRC6B:TGFBR2:CCR1:FOXP1:NFKBIZ:HCLS1:SH3RF1:HMGB2:PIK3R1:MEF2C:IRF1:CD7…
GO_CELL_MORPHOGENESIS_INVOLVED_IN_NEURON_DIFFERENTIATION	276	90	3.51343e-06	0.000206589	DVL1:RERE:EPHA2:LYPLA2:MACF1:NEXN:SHC1:PLXNA2:ENAH:ITGB1:VCL:KIAA1598:ILK:B3GNT1:TSKU:LRP1:PLXNC1:SSH1:RB1:FARP1:EFNB2:NFATC4:NUMB:EVL:NDN:MAP2K1:NPTN:MEF2A:EEF2K:MAPK3:CDH11:SSH2:GRB2:STK11:VASP:ID2:RAB10:SPTBN1:B3GNT2:ACTR2:TTL:CXCR4:ZEB2:BMPR2:NRP2:KLF7:CREB1:GPC1:STK25:PTPRA:APP:TIAM1:MAPK1:YWHAH:RBFOX2:RAC2:PLXNB2:SS18L2:TWF2:WNT5A:ALCAM:PLXND1:PIK3CA:SLIT2:RUFY3:SPP1:PPP3CA:PALLD:EMB:ZSWIM6…
GO_REGULATION_OF_CELLULAR_COMPONENT_SIZE	205	71	3.61697e-06	0.00021099	WDTC1:MACF1:LAMTOR5:CAPZA1:HAX1:ADD3:KIAA1598:ILK:FCHSD2:EPS8:ANO6:NCKAP1L:LRP1:CDK4:SSH1:CFL2:EVL:SLC12A6:TMOD3:C15orf38:PFN1:SSH2:SNF8:GRB2:GMFG:VASP:PPP1R15A:AKT1S1:MYADM:CDC42EP3:SPTBN1:ACTR2:PLEK:CAPG:TTL:WIPF1:BMPR2:CREB1:HCK:PREX1:RAB22A:CDC42EP1:TWF2:PRKCD:WNT5A:HCLS1:ADD1:WDR1:SLIT2:RUFY3:SPP1:MAP1B:FER:SLC12A2:FCHSD1:LARS:EDN1:LRRC16A:VEGFA:ARHGAP18:RAC1:PPP1R9A:ARPC1B:CAPZA2:DPYSL2:PTK…
GO_POSITIVE_REGULATION_OF_CELLULAR_COMPONENT_ORGANIZATION	694	194	3.66768e-06	0.000212263	DVL1:EPHA2:MACF1:LEPRE1:MIER1:SH3GLB1:FNBP1L:RAP1A:RHOC:CHD1L:S100A10:HAX1:CCT3:ABL2:RGS2:PLXNA2:CAPN2:TP53BP2:RHOU:HNRNPU-AS1:HNRNPU:OPTN:FAM178A:KIAA1598:BNIP3:CD151:ILK:ATL3:RPS6KA4:ARL2:NUMA1:ARAP1:FCHSD2:MRE11A:ATM:KMT2A:CBL:PHB2:EPS8:KIAA1551:ANO6:HNRNPA1:NCKAP1L:LRP1:LLPH:DCN:PLXNC1:SSH1:MAPKAPK5:PEBP1:PXN:CAMKK2:GTF2H3:MPHOSPH8:RB1:TFDP1:CFL2:DDHD1:HIF1A:EVL:WARS:APOPT1:NUSAP1:B2M:RAB8B:M…
GO_REGULATION_OF_RESPONSE_TO_EXTERNAL_STIMULUS	338	106	3.72377e-06	0.000213826	DVL1:TNFRSF1B:PLA2G2A:C1QA:F3:S100A12:IL6R:FCER1G:PTPRC:OPTN:NMT2:CUEDC2:ADAM8:SIGIRR:RELA:BIRC2:ATM:ETS1:CD9:TNFRSF1A:C3AR1:ANO6:NCKAP1L:LRP1:CMKLR1:HMGB1:RB1:EFNB2:GAS6:NFKBIA:THBS1:EIF2AK4:MAP2K1:SMAD3:MAPK3:STX4:CYLD:PER1:LGALS9:CCL2:NFE2L1:SEC14L1:SOCS3:RIOK3:SBNO2:LDLR:KANK2:PLAUR:CARD8:PLEK:IL1R2:IL1RL1:CLASP1:CXCR4:BMPR2:TRAF3IP1:SIRPA:MAVS:HCK:APP:TIAM1:ITGB2:IL17RA:RAC2:PPARA:TGFBR2:MYD…
GO_REGULATION_OF_CELL_CELL_ADHESION	187	66	3.83021e-06	0.000215861	PTAFR:VCAM1:IL6R:KIFAP3:PTPRC:ZMIZ1:ADAM8:CD44:FERMT3:RELA:LRRC32:ETS1:CD9:NCKAP1L:HMGB1:HSPH1:EFNB2:TNFSF13B:LGALS3:SOCS1:IL4R:CYLD:PIEZO1:LGALS9:CCL2:RARA:GRB2:MALT1:MYADM:DPP4:ITGA6:SIRPA:BMP2:SDC4:LGALS1:PPARA:TGFBR2:PRKCD:WNT5A:NFKBIZ:PIK3CA:MYO10:IL6ST:PIK3R1:IRF1:CD74:DUSP22:HLA-E:FLOT1:AIF1:HLA-DPA1:HLA-DPB1:MAPK14:TNFRSF21:FYN:CITED2:RAC1:CAV1:PAG1:FAM49B:JAK2:SYK:ABL1:VSIG4:EFNB1:IRAK1
GO_DEFENSE_RESPONSE_TO_OTHER_ORGANISM	187	66	3.83021e-06	0.000215861	ISG15:EPHA2:PLA2G2A:GBP1:S100A12:IL6R:ADAR:SHC1:IFI16:FCER1G:MR1:PTPRC:OPTN:DDIT4:IFIT2:IFIT3:BNIP3:IFITM2:IFITM3:FAM111A:RELA:BIRC2:TNFRSF1A:STAT2:IFI27:IGHM:EIF2AK4:PML:IL4R:MAPK3:SEC14L1:RIOK3:BST2:BCL3:EIF2AK2:SLC11A1:ATG16L1:TRAF3IP1:MAVS:SAMHD1:ADAMTS5:IFNAR2:AP000295,9:IL10RB:IL17RA:MYD88:SETD2:STAB1:PRKCD:FOXP1:PARP9:DTX3L:PLSCR1:RBPJ:HMGB2:IRF2:IRF1:HLA-E:TNFAIP3:WIPI2:ZC3HAV1:DDX58:SYK:…
GO_CELL_PROJECTION_ASSEMBLY	288	93	3.84732e-06	0.000215861	EPHA2:TACSTD2:ODF2L:FNBP1L:KIFAP3:RHOU:SDCCAG8:ITGB1:VCL:ARL3:ABLIM1:KIAA1598:ARFIP2:PARVA:ARAP1:EMP1:EPS8:ANO6:TUBA1A:NCKAP1L:CEP290:NEDD1:SSH1:RILPL2:RILPL1:EVL:HAUS2:CLUAP1:CCP110:SH2B1:CYLD:ATMIN:PFN1:PMP22:SSH2:PLEKHM1:SEPT9:CSNK1D:CEP192:ROCK1:S1PR2:PRKACA:CDC42EP3:RHOQ:CCDC88A:ACTR2:CLASP1:ITGA6:TRAF3IP1:ZMYND8:C21orf2:RAC2:CDC42EP1:CSNK1E:RABL2B:MAP4:TWF2:PRKCD:NPHP3:HAUS3:SLIT2:CEP135:NE…
GO_MUSCLE_SYSTEM_PROCESS	162	59	4.02109e-06	0.000223902	TNFRSF1B:PTAFR:ATP1B1:RGS2:PPP1R12B:ATP2B4:VIM:VCL:ACTA2:MYOF:TNFRSF1A:SSPN:PXN:FOXO1:TMOD3:SMAD3:IREB2:MEF2A:MYH11:ROCK1:DSG2:CTDP1:PRKACA:TPM4:CALM3:ROCK2:SLC8A1:CALM2:CFLAR:MYL9:TIAM1:HMOX1:PPARA:LMCD1:SLMAP:PIK3CA:PPP3CA:SORBS2:ITGA1:IL6ST:PDE4D:HOMER1:MEF2C:EDN1:JARID2:AIF1:GJA1:CTGF:UTRN:CAV1:CALD1:EZH2:ASPH:FBXO32:TLN1:NOTCH1:DMD:FLNA:TAZ
GO_ENDOCYTOSIS	300	96	4.16078e-06	0.000229938	FNBP1L:PI4KB:FCER1G:ABL2:MAPKAPK2:RHOU:ARHGAP12:ITGB1:CD151:CD81:FOLR2:FCHSD2:MTMR2:CBL:SORL1:CD9:CD163:ANO6:BIN2:NCKAP1L:LRP1:HSPH1:EFNB2:LGALS3:NUMB:IGHM:THBS1:EHD4:B2M:SNX1:MFGE8:EEF2K:MAPK3:ARRB2:EPN2:UNC119:ARHGAP27:NME1:GRB2:LGALS3BP:RAB31:ROCK1:PIK3C3:PIP5K1C:SH3GL1:MARCH2:LDLR:EPS15L1:AXL:APOC1:CALM3:ITSN2:RHOQ:EHBP1:WIPF1:DGKD:SNX5:RAB22A:APP:ITSN1:ITGB2:MAPK1:MYH9:CSNK1E:TGFBR2:STAB1:WN…
GO_MACROPHAGE_ACTIVATION	41	22	4.22018e-06	0.000231343	C1QA:JUN:PTPRC:ATM:THBS1:IL4R:SBNO2:LDLR:TYROBP:IL1RL1:SLC11A1:APP:ITGB2:WNT5A:FOXP1:PJA2:CD74:AIF1:NAMPT:SYK:TLR4:VSIG4
GO_TUMOR_NECROSIS_FACTOR_SUPERFAMILY_CYTOKINE_PRODUCTION	74	33	4.24915e-06	0.000231343	PTAFR:ARHGEF2:FCER1G:PTPRC:MAPKAPK2:ADAM8:HMGB1:GAS6:NFATC4:THBS1:ARRB2:LGALS9:RARA:TYROBP:ZFP36:AXL:BCL3:SIRPA:MAVS:APP:TSPO:WNT5A:FOXP1:ZBTB20:PIK3R1:RIPK1:HLA-E:TNFAIP3:HSF1:JAK2:DDX58:TLR4:CYBB
GO_REGULATION_OF_PROTEIN_MODIFICATION_PROCESS	964	257	5.23099e-06	0.000282704	NOC2L:ISG15:DVL1:SKI:CAMTA1:MTHFR:EPHA2:PLA2G2A:PHACTR4:LEPRE1:JUN:GADD45A:PRKACB:CYR61:GBP1:RAP1A:S100A12:HAX1:IL6R:ADAR:SHC1:ARHGEF2:FAM129A:RGS2:PTPRC:ATP2B4:DSTYK:MAPKAPK2:PPP2R5A:CCNY:UBE2D1:DDIT4:DUSP5:SHOC2:ADAM8:CD81:CDKN1C:ILK:SVIP:CD44:CRY2:RPS6KA4:RELA:CCND1:MRE11A:BIRC2:ATM:KMT2A:CBL:SORL1:CCND2:TNFRSF1A:PHB2:KRAS:NCKAP1L:RNF41:STAT2:LRP1:CDK4:RAP1B:OSBPL8:DUSP6:MAPKAPK5:PEBP1:GCN1L1:…
GO_SKELETAL_SYSTEM_DEVELOPMENT	222	75	5.50864e-06	0.000295537	SKI:EPHA2:LEPRE1:SLC35D1:CYR61:THBS3:PBX1:PTPRC:KIAA1217:PAPSS2:CDKN1C:CD44:RELA:SERPINH1:MGP:ANO6:LUM:CMKLR1:HIF1A:FOXN3:FBN1:SMAD3:LRRK1:PKD1:XYLT1:MAPK3:VKORC1:CDH11:MAF:FAM101B:RARA:IGFBP4:COL1A1:TYROBP:ACVR2A:KIAA1715:COL3A1:COL5A2:BMPR2:COL6A3:BMP2:ETS2:COL6A1:COL6A2:TGFBR2:SETD2:COL7A1:WNT5A:FOXP1:WHSC1:PDGFRA:PAPSS1:ANKH:VCAN:MEF2C:TGFBI:NDST1:SPARC:FOXC1:EDN1:MAPK14:RAB23:GJA1:CTGF:COL1A…
GO_IMMUNE_RESPONSE_REGULATING_SIGNALING_PATHWAY	302	96	5.70757e-06	0.00030399	JUN:PRKACB:GBP1:RAP1A:CTSS:SHC1:MNDA:FCER1G:FCGR2A:FCGR3A:PTPRC:RAB7L1:MAPKAPK2:UBE2D1:RELA:BIRC2:C3AR1:KRAS:NCKAP1L:CMKLR1:HMGB1:NFKBIA:LGALS3:FOS:IGHM:PRKCB:MAPK3:CYLD:CMTM3:ARRB2:GRB2:SEC14L1:RIOK3:PIK3C3:MALT1:STK11:PRKACA:BAX:FPR1:PSME4:ACTR2:WIPF1:SLC39A10:INPP5D:HCK:NFATC2:ITGB2:MAPK1:MYD88:PRKCD:APPL1:FOXP1:NFKBIZ:PLSCR1:PIK3CA:PPP3CA:ALPK1:MYO10:FYB:MAP3K1:PDE4D:PIK3R1:MEF2C:FER:PJA2:IRF…
GO_PHAGOCYTOSIS	146	54	6.04475e-06	0.000319632	LEPR:RAP1A:FCER1G:FCGR2A:FCGR3A:NCF2:PTPRC:ARHGAP12:ITGB1:ANO6:BIN2:NCKAP1L:LRP1:HMGB1:GAS6:IGHM:THBS1:RAB27A:MFGE8:MAPK3:ELMO3:CCL2:RARA:GRB2:RAB31:PIP5K1C:LDLR:AXL:ACTR2:MERTK:WIPF1:SLC11A1:SIRPA:HCK:ITGB2:MAPK1:MYH9:PRKCD:APPL1:PIK3CA:MYO10:PIK3R1:CDC42SE2:CYFIP2:AIF1:FYN:ACTB:RAC1:ARPC1B:MSR1:SYK:ABL1:SRPX:WAS
GO_REGULATION_OF_CELL_SHAPE	88	37	6.22055e-06	0.000326579	RHOC:PLEKHO1:S100A13:PLXNA2:RHOU:PARVA:ARAP1:EPS8:PLXNC1:FERMT2:LINC00341:SYNE3:CCL2:GNA13:CDC42EP3:RHOQ:RND3:HCK:C21orf2:ITGB2:MYH9:CDC42EP1:PLXNB2:PLXND1:WDR1:SHROOM3:MYO10:CDC42SE2:LST1:VEGFA:FYN:ARHGAP18:GNA12:SEPT7:MKLN1:PTK2B:SEMA4D:MSN
GO_POSITIVE_REGULATION_OF_LEUKOCYTE_CHEMOTAXIS	39	21	6.49113e-06	0.000338367	IL6R:C3AR1:ANO6:NCKAP1L:CMKLR1:HMGB1:GAS6:THBS1:MAPK3:LGALS9:RAC2:OXSR1:CCR1:WNT5A:CD74:EDN1:AIF1:MAPK14:VEGFA:RAC1:PTK2B
GO_CELL_PART_MORPHOGENESIS	334	104	6.55532e-06	0.000339307	DVL1:RERE:EPHA2:LYPLA2:MACF1:NEXN:PLEKHO1:SHC1:PLXNA2:ENAH:ITGB1:VCL:KIAA1598:ILK:CD44:B3GNT1:TSKU:NCKAP1L:LRP1:LLPH:PLXNC1:SSH1:FARP1:EFNB2:NFATC4:NUMB:EVL:NDN:EIF2AK4:SNX1:MAP2K1:NPTN:C15orf38:MEF2A:EEF2K:MAPK3:CDH11:GAS7:SSH2:GRB2:ROCK1:STK11:VASP:BAX:ITSN2:RAB10:SPTBN1:PNPT1:B3GNT2:ACTR2:MAP4K4:TTL:CXCR4:ZEB2:BMPR2:NRP2:KLF7:CREB1:GPC1:STK25:PTPRA:PANK2:APP:TIAM1:MAPK1:YWHAH:RBFOX2:RAC2:PLXNB…
GO_PROTEIN_AUTOPHOSPHORYLATION	136	51	6.92485e-06	0.000354235	MKNK1:JUN:ABL2:PTPRC:MAPKAPK2:PPP2R5A:MRE11A:ATM:SIK2:MAPKAPK5:CAMKK2:VRK1:PPP2R5C:MARK3:EIF2AK4:ULK3:IGF1R:EEF2K:MVP:MAPK3:MAP3K3:STK11:MKNK2:PRKACA:CALM3:EIF2AK2:CALM2:VRK2:STK17B:STK25:HCK:OXSR1:RAP2B:PDGFRA:FER:RIPK1:PPP2R5D:VEGFA:FYN:ENPP1:PDGFA:CAV1:PTK2B:NBN:SLA:JAK2:SYK:NEK6:ABL1:PRKX:IRAK1
GO_MYELOID_LEUKOCYTE_MEDIATED_IMMUNITY	354	109	6.94011e-06	0.000354235	TNFRSF1B:PTAFR:PPIE:RAP1A:CD58:CTSS:S100A11:S100A12:S100A13:MNDA:CD84:FCER1G:FCGR2A:FCGR3B:SELL:PTPRC:TMEM63A:VCL:TSPAN14:ADAM8:AMPD3:SVIP:CAT:CD44:FTH1:RAB6A:PRCP:CTSC:CBL:SLC2A3:C3AR1:ANO6:METTL7A:BIN2:NCKAP1L:RAP1B:CEP290:LTA4H:SLC15A4:HMGB1:PYGL:LGALS3:NPC2:B2M:RAB27A:IL4R:MVP:STX4:CRISPLD2:APRT:CD68:LGALS9:VAT1:TMC6:RAB31:ROCK1:CFD:CNN2:AP1M1:BST2:GPI:TYROBP:GMFG:PLAUR:FTL:FPR1:LAIR1:RAB10:A…
GO_POSITIVE_REGULATION_OF_TUMOR_NECROSIS_FACTOR_SUPERFAMILY_CYTOKINE_PRODUCTION	42	22	7.11167e-06	0.000360488	PTAFR:ARHGEF2:FCER1G:PTPRC:MAPKAPK2:ADAM8:HMGB1:NFATC4:THBS1:LGALS9:TYROBP:MAVS:APP:WNT5A:ZBTB20:PIK3R1:RIPK1:HLA-E:JAK2:DDX58:TLR4:CYBB
GO_STRIATED_MUSCLE_CELL_DIFFERENTIATION	112	44	7.35505e-06	0.000370272	SKI:PLEKHO1:RGS2:CAPN2:HNRNPU-AS1:HNRNPU:ITGB1:MYOF:KRAS:BHLHE41:RB1:EFNB2:CFL2:TMOD3:MEF2A:MYH11:IL4R:ARRB2:KDM6B:RARA:SPAG9:CTDP1:SLC8A1:CFLAR:BMP2:NFATC2:MYH9:PPARA:WDR1:RBPJ:PDGFRA:PPP3CA:SORBS2:HOMER1:MEF2C:MAML1:EDN1:FLOT1:MAPK14:VEGFA:CAV2:EZH2:NOTCH1:DMD:MORF4L2
GO_ACTIN_FILAMENT_BUNDLE_ORGANIZATION	92	38	7.75321e-06	0.00038766	TACSTD2:RHOC:S100A10:ADD3:KIAA1598:ARAP1:EPS8:PXN:ACTN1:EVL:SMAD3:FHOD1:FAM101B:PFN1:ROCK1:ITGB1BP1:ROCK2:PLEK:CLASP1:RND3:SDC4:ADD1:SYNPO2:PIK3R1:NEDD9:LRRC16A:AIF1:CTGF:FSCN1:RAC1:PPP1R9A:ZYX:PTK2B:ABL1:AIF1L:WAS:PLS3:FLNA
GO_REGULATION_OF_MYELOID_LEUKOCYTE_DIFFERENTIATION	57	27	7.94071e-06	0.000394353	CTNNBIP1:C1QC:JUN:HAX1:RB1:ZFP36L1:FOS:FBN1:EVI2B:RARA:NME1:TYROBP:ID2:CREB1:INPP5D:MAFB:CCR1:FOXP1:HCLS1:PIK3R1:CD74:RIPK1:CDK6:TRIB1:MYC:TLR4:TFE3
GO_CELL_JUNCTION_ORGANIZATION	176	62	8.02543e-06	0.000395885	EPHA2:MACF1:PKN2:RAP1A:CAPZA1:RHOC:HIPK1:S100A10:LAMC2:VCL:COL17A1:CD151:ILK:ARL2:CD9:HDAC7:LRP1:RAP1B:FERMT2:ACTN1:NUMB:THBS1:RAB8B:SMAD3:CDH11:VMP1:ROCK1:LAMA3:DSG2:MAPRE2:PIP5K1C:PRKACA:PVR:VASP:ITGB1BP1:ROCK2:MAP4K4:LIMS1:CLASP1:LIMS2:ITGA6:TNS1:SDC4:HEG1:ADD1:WDR1:APC:DUSP22:FLOT1:VEGFA:DST:GJA1:ACTB:FSCN1:RAC1:CAV1:PTK2B:MTDH:PLEC:TLN1:ABL1:FLNA
GO_EXOCYTOSIS	516	149	8.39146e-06	0.000411182	DVL1:TNFRSF1B:PTAFR:PPIE:RAP1A:CD58:CTSS:S100A11:S100A12:S100A13:MNDA:TAGLN2:CD84:FCER1G:FCGR2A:FCGR3B:SELL:PTPRC:TMEM63A:SRGN:VCL:TSPAN14:ADAM8:AMPD3:SVIP:CAT:CD44:FTH1:FERMT3:RAB6A:PRCP:SYTL2:CTSC:ENDOD1:CBL:CD9:SLC2A3:C3AR1:ANO6:METTL7A:BIN2:NCKAP1L:RAP1B:CEP290:LTA4H:SLC15A4:HMGB1:GAS6:PYGL:LGALS3:ACTN1:NPC2:TNFAIP2:THBS1:B2M:BLOC1S6:RAB27A:RAB8B:PRKCB:IL4R:MVP:STX4:CRISPLD2:APRT:CD68:LGALS9:…
GO_REGULATION_OF_BONE_MINERALIZATION	34	19	8.74114e-06	0.000424904	ISG15:CYR61:SRGN:MGP:ANO6:HIF1A:SMAD3:FAM101B:SLC8A1:ACVR2A:BMPR2:BMP2:CCR1:BMP2K:ANKH:MEF2C:ENPP1:PTK2B:BCOR
GO_CELL_MATRIX_ADHESION	123	47	8.78713e-06	0.000424904	MACF1:VCAM1:S100A10:ADAM15:THBS3:ITGB1:VCL:COL17A1:ILK:LYVE1:CD44:LRP1:PXN:FERMT2:ACTN1:FBLN5:THBS1:SMAD3:PKD1:ROCK1:ITGB1BP1:ROCK2:MAP4K4:LIMS1:CLASP1:ITGB6:ITGA6:COL3A1:FERMT1:SDC4:TIAM1:ITGB2:ITGA1:PIK3R1:DUSP22:VEGFA:CTGF:UTRN:RAC1:CDK6:MKLN1:ZYX:PTK2B:PLEKHA2:ADAM9:ABL1:CASK
GO_HEART_DEVELOPMENT	286	91	9.57866e-06	0.000460151	DVL1:TNFRSF1B:ECE1:LUZP1:JUN:CYR61:VCAM1:SHC1:ADAM15:RGS2:EGLN1:HNRNPU-AS1:HNRNPU:ITGB1:ZMIZ1:ILK:PARVA:YAP1:ADIPOR2:TNFRSF1A:DUSP6:TMED2:RB1:EFNB2:NFATC4:HIF1A:ZFP36L1:SPRED1:FBN1:MAP2K1:SMAD3:MEF2A:PKD1:MYH11:MAPK3:ARRB2:KDM6B:ADAP2:RARA:ROCK1:DSG2:CTDP1:ID2:ROCK2:SLC8A1:ATF2:COL3A1:BMPR2:NRP2:CREB1:TRAF3IP1:FKBP1A:BMP2:POFUT1:ADAMTS1:MAPK1:PPARA:CRELD1:TGFBR2:SETD2:WNT5A:HEG1:PLXND1:NPHP3:C3or…
GO_CELLULAR_RESPONSE_TO_ENDOGENOUS_STIMULUS	708	195	9.82659e-06	0.000468996	GNB1:SKI:KIF1B:WDTC1:PTAFR:JUN:LEPR:PRKACB:CYR61:VCAM1:LAMTOR5:RAP1A:CTSS:SHC1:ARHGEF2:ATP2B4:DSTYK:CAPN2:HNRNPU-AS1:HNRNPU:VIM:UBE2D1:EIF4EBP2:DDIT4:SHOC2:PTPRE:POLR2L:CDKN1C:ILK:CD44:CRY2:CREB3L1:FAM89B:RELA:NUMA1:FOLR2:LRRC32:PRCP:YAP1:SIK2:ZNF259:CBL:ADIPOR2:PHB2:ITPR2:NR4A1:CALCOCO1:HNRNPA1:LRP1:CDK4:RAP1B:OSBPL8:ATP2B1:SSH1:PXN:NCOR2:FOXO1:RB1:SPRY2:COL4A1:COL4A2:FERMT2:MAX:ZFP36L1:LTBP2:FO…
GO_NEGATIVE_REGULATION_OF_CYTOKINE_PRODUCTION	134	50	9.98747e-06	0.000473599	ISG15:EPHA2:GBP1:CD84:PTPRC:SRGN:CUEDC2:SIGIRR:UBE2L6:RPS6KA4:LRRC32:HDAC7:NCKAP1L:CMKLR1:HMGB1:GAS6:THBS1:PML:CYLD:ARRB2:LGALS9:RARA:KLF2:BST2:HOMER3:TYROBP:ZFP36:AXL:BCL3:CARD8:REL:IL1R2:IL1RL1:MERTK:NMI:SLC11A1:INPP5D:TRAF3IP1:SIRPA:MAVS:HMOX1:TSPO:TNFRSF21:CD2AP:TNFAIP3:RAC1:HSF1:DDX58:TLR4:VSIG4
GO_PEPTIDYL_TYROSINE_MODIFICATION	170	60	1.04661e-05	0.000492003	EPHA2:JAK1:HAX1:IL6R:SHC1:ARHGEF2:ABL2:PTPRC:DSTYK:CD81:CD44:CBL:TNFRSF1A:CAMKK2:GAS6:EHD4:MAP2K1:IGF1R:LRRK1:SOCS1:MVP:MAPK3:ARL2BP:ARRB2:UNC119:STAT3:SOCS3:TYK2:AXL:EIF2AK2:MERTK:TTL:HCK:SAMSN1:APP:ITGB2:PRKCD:HCLS1:PARP9:PARP14:RAP2B:PDGFRA:NEK1:IL6ST:FER:CD74:DUSP22:NEDD9:VEGFA:IBTK:FYN:PDGFA:CAV1:PTK2B:SLA:HSF1:JAK2:SEMA4D:SYK:ABL1
GO_REGULATION_OF_CYTOSKELETON_ORGANIZATION	306	96	1.05446e-05	0.000492003	TACSTD2:NEXN:CAPZA1:RHOC:S100A10:HAX1:ARHGEF2:ABL2:CAPN2:RHOU:HNRNPU-AS1:HNRNPU:ADD3:ILK:ARL2:NUMA1:ARAP1:FCHSD2:DIXDC1:EPS8:NCKAP1L:LRP1:SSH1:PXN:CFL2:EVL:TMOD3:SMAD3:C15orf38:PKD1:MAPK3:CYLD:FHOD1:PFN1:SSH2:GRB2:ROCK1:MAPRE2:BST2:GMFG:VASP:NUP62:MYADM:ITGB1BP1:ROCK2:CDC42EP3:RHOQ:SPTBN1:CCDC88A:ACTR2:PLEK:CAPG:CLASP1:RND3:WIPF1:TRAF3IP1:HCK:SDC4:PREX1:MAPK1:CDC42EP1:TWF2:PRKCD:HCLS1:TACC3:ADD1:…
GO_ACTIVATION_OF_PROTEIN_KINASE_ACTIVITY	181	63	1.05764e-05	0.000492003	GADD45A:PRKACB:IL6R:SHC1:PTPRC:MAPKAPK2:DUSP5:CD81:NCKAP1L:OSBPL8:DUSP6:MAPKAPK5:GAS6:MAP4K5:THBS1:MAP2K1:TRAF7:SOCS1:MAPK3:SPAG9:MAP3K3:MALT1:STK11:GADD45B:S1PR2:PRKACA:PAK4:FPR1:ITGB1BP1:EIF2AK2:CCDC88A:MAP4K4:CXCR4:MLTK:SLC11A1:CAB39:COPS8:STK25:BMP2:MAPK1:TGFBR2:OXSR1:PRKAR2A:PRKCD:WNT5A:PIK3CA:NEK1:ITGA1:MAP3K1:CD74:RIPK1:MAPK14:VEGFA:MAP3K5:RP1-111D6,3:TAB2:MDFIC:PTK2B:ADAM9:JAK2:SYK:TLR4:A…
GO_POSITIVE_REGULATION_OF_MOLECULAR_FUNCTION	926	246	1.14185e-05	0.000527837	SKI:EPHA2:PTAFR:PHACTR4:SMAP2:JUN:GADD45A:DNAJB4:PRKACB:CYR61:ARHGAP29:F3:RAP1A:RHOC:APH1A:CTSS:S100A10:S100A12:IL6R:SHC1:ARHGEF2:IFI16:ARHGAP30:ATP1B1:ABL2:NCF2:RGS2:PTPRC:PPP1R12B:ATP2B4:DSTYK:MAPKAPK2:HNRNPU-AS1:HNRNPU:ARHGAP21:ARHGAP12:ITGB1:CCNY:NFKB2:DUSP5:ADAM8:RIC8A:CD81:ILK:CAT:ARHGAP1:RPS6KA4:RELA:CCND1:ARAP1:MRE11A:CASP1:KMT2A:SORL1:CCND2:PHB2:KRAS:NCKAP1L:RNF41:LRP1:SRGAP1:OSBPL8:DUSP…
GO_AGING	189	65	1.20221e-05	0.00055197	TNFRSF1B:C1QA:JUN:VCAM1:ZMIZ1:DNMBP:NFKB2:CDKN1C:ILK:CAT:RELA:CTSC:ATM:KRAS:LRP1:ATP2B1:DCN:MAPKAPK5:PEBP1:COL4A2:ERO1L:FOS:MAP2K1:PML:ULK3:IREB2:RSL1D1:YPEL3:MAPK3:CD68:STAT3:MAP3K3:GRB2:NUP62:ID2:SMC6:MSH2:PNPT1:LIMS1:CREB1:INPP5D:APP:ITGB2:MAPK1:TSPO:TGFBR2:PRKCD:MME:PPP3CA:PDE4D:SLC12A2:EDN1:HMGA1:MAPK14:CTGF:SOD2:CDK6:PPP1R9A:NAPEPLD:NAMPT:LOXL2:NEK6:ABL1:TIMP1:IRAK1
GO_CIRCULATORY_SYSTEM_PROCESS	178	62	1.20908e-05	0.00055197	CTNNBIP1:MTHFR:ECE1:PTAFR:ATP1B1:RGS2:ATP2B4:KCNK1:CELF2:ACTA2:MYOF:NAV2:PRCP:YAP1:C3AR1:ITPR2:ATP2B1:PEBP1:GAS6:SMAD3:MEF2A:ROCK1:DSG2:PRKACA:CALM3:ID2:ITGB1BP1:ROCK2:SLC8A1:CALM2:BMPR2:SNX5:CTSZ:RCAN1:HMOX1:CYB5R3:PPARA:ITPR1:THRB:GNAI2:HEG1:MME:PIK3CA:SLIT2:ITGA1:PDE4D:FOXC1:EDN1:FYN:GJA1:CTGF:SGK1:SOD2:COL1A2:NAMPT:CAV1:ASPH:JAK2:DMD:ATP6AP2:FLNA:TAZ
GO_RESPONSE_TO_DRUG	442	130	1.21778e-05	0.000552512	GNB1:KIF1B:MTHFR:PTAFR:JUN:PRKACB:VCAM1:SLC25A24:RAP1A:S100A10:ADAM15:ARHGEF2:SELL:RGS2:CENPF:CAPN2:EGLN1:KCNK1:MTR:VIM:DDIT4:BNIP3:LDHA:CAT:MDK:RELA:CPT1A:CCND1:FOLR2:YAP1:BIRC2:NNMT:KMT2A:CBL:ETS1:EPS8:ITPR2:HNRNPA1:NCKAP1L:STAT6:CDK4:RAP1B:DUSP6:SSH1:PEBP1:SLC15A4:FOXO1:GAS6:NFKBIA:FOS:THBS1:B2M:IREB2:ABHD2:MAPK3:MT2A:GOT2:KDM6B:RARA:STAT3:COL1A1:NME1:TGIF1:DSG2:JUNB:KLF2:GPI:AXL:XRCC1:FOSB:CA…
GO_EMBRYONIC_MORPHOGENESIS	253	82	1.22976e-05	0.000552613	DVL1:SKI:MTHFR:EPHA2:ECE1:LUZP1:PHACTR4:PRKACB:CYR61:HIPK1:PBX1:ITGB1:RIC8A:CDKN1C:YAP1:CEP290:KDM2B:TMED2:SPRY2:COL4A2:HIF1A:ZFP36L1:FBN1:SMAD3:MAPK3:PFN1:KDM6B:RARA:GRB2:SOCS3:LAMA3:PRKACA:GPI:VASP:BAX:MYADM:ID2:NCOA1:CLASP1:ZEB2:ACVR2A:MLTK:KIAA1715:COL5A2:BMPR2:TRAF3IP1:MAFB:SDC4:ETS2:ITGB2:COL6A1:MAPK1:PLXNB2:TGFBR2:SETD2:COL7A1:WNT5A:NPHP3:MBNL1:UGDH:PDGFRA:SHROOM3:IRX2:C5orf42:MEF2C:NDST1:…
GO_POSITIVE_REGULATION_OF_MYELOID_CELL_DIFFERENTIATION	49	24	1.2362e-05	0.000552613	ISG15:CTNNBIP1:JUN:HAX1:ETS1:NCKAP1L:RB1:HIF1A:ZFP36L1:FOS:EVI2B:STAT3:TYROBP:ID2:ACVR2A:CREB1:INPP5D:CCR1:HCLS1:HMGB2:CD74:RIPK1:MAPK14:TRIB1
GO_POSITIVE_REGULATION_OF_MYELOID_LEUKOCYTE_DIFFERENTIATION	24	15	1.24056e-05	0.000552613	CTNNBIP1:JUN:HAX1:RB1:ZFP36L1:FOS:EVI2B:TYROBP:ID2:CREB1:CCR1:HCLS1:CD74:RIPK1:TRIB1
GO_INTERLEUKIN_1_BETA_PRODUCTION	32	18	1.33686e-05	0.000591922	IFI16:MR1:CASP1:HMGB1:SMAD3:PML:ARRB2:LGALS9:TYROBP:CARD8:SIRPA:APP:WNT5A:FOXP1:EGR1:TNFAIP3:JAK2:TLR4
GO_SIGNAL_TRANSDUCTION_BY_PROTEIN_PHOSPHORYLATION	456	133	1.52519e-05	0.000671265	EPHA2:PLA2G2A:JUN:JAK1:GADD45A:CYR61:GBP1:RAP1A:S100A12:SHC1:RGS2:PTPRC:DSTYK:MAPKAPK2:DUSP5:ADAM8:CD81:ILK:CD44:SORL1:PHB2:KRAS:RNF41:LRP1:RAP1B:DUSP6:MAPKAPK5:PEBP1:CAMKK2:HMGB1:FOXO1:SPRY2:GAS6:MAP4K5:STYX:ZFP36L1:MARK3:SPRED1:THBS1:MAP2K1:NPTN:IGF1R:MEF2A:TRAF7:MAPK3:CYLD:ARRB2:PER1:KSR1:LGALS9:CCL2:IGFBP4:SPAG9:MAP3K3:GRB2:ROCK1:GADD45B:SH2D3A:S1PR2:PAK4:ZFP36:PPP5C:RRAS:NUP62:FPR1:ITGB1BP1:…
GO_NEUROGENESIS	730	199	1.61058e-05	0.00070463	DVL1:SKI:RERE:EPHA2:C1QA:LYPLA2:MACF1:MYCL:LEPRE1:JUN:NEXN:VCAM1:RAP1A:HIPK1:SHC1:ARHGEF2:PBX1:ABL2:RGS2:NAV1:RAB7L1:PLXNA2:ENAH:MTR:SDCCAG8:VIM:ITGB1:DDIT4:VCL:BLOC1S2:ARL3:KIAA1598:BNIP3:CDKN1C:ILK:DENND5A:NAV2:RELA:B3GNT1:TSKU:MTMR2:YAP1:DIXDC1:ZNF259:SORL1:CD9:ETV6:KRAS:BHLHE41:NCKAP1L:LRP1:LLPH:NAP1L1:CEP290:PLXNC1:SSH1:HMGB1:RB1:FARP1:EFNB2:GAS6:NFATC4:HIF1A:NUMB:EVL:NDN:EIF2AK4:B2M:BLOC1S6…
GO_MYELOID_LEUKOCYTE_MIGRATION	78	33	1.66993e-05	0.000717841	S100A12:IL6R:FCER1G:ADAM8:C3AR1:ANO6:NCKAP1L:CMKLR1:HMGB1:LGALS3:THBS1:MAPK3:CKLF:CCL2:PIP5K1C:SIRPA:PREX1:ITGB2:IL17RA:RAC2:CCR1:WDR1:SLIT2:ITGA1:PDE4D:CD74:EDN1:AIF1:MAPK14:VEGFA:RAC1:PTK2B:SYK
GO_OSSIFICATION	187	64	1.67008e-05	0.000717841	ISG15:SKI:CTNNBIP1:EPHA2:CYR61:IL6R:THBS3:PBX1:HNRNPU-AS1:HNRNPU:SRGN:ILK:CAT:CREB3L1:MGP:ANO6:HDAC7:HIF1A:SMAD3:RSL1D1:XYLT1:MAPK3:CDH11:FAM101B:COL1A1:DDX5:ALYREF:SBNO2:JUNB:PRKACA:TPM4:ID2:SLC8A1:ACVR2A:COL5A2:BMPR2:BMP2:COL6A1:MAPK1:CCR1:WNT5A:RBPJ:BMP2K:SPP1:ANKH:IL6ST:VCAN:MEF2C:SPARC:PDLIM7:FOXC1:ID4:MAPK14:ENPP1:CTGF:SUN1:IGFBP3:CDK6:COL1A2:PTK2B:CTHRC1:EXT1:SEMA4D:NOTCH1:BCOR
GO_REGULATION_OF_SYSTEM_PROCESS	187	64	1.67008e-05	0.000717841	DVL1:TNFRSF1B:ECE1:PTAFR:ATP1B1:RGS2:PPP1R12B:ATP2B4:KCNK1:CELF2:MTMR2:TNFRSF1A:ITPR2:ATP2B1:SSH1:PEBP1:FOXO1:GAS6:RAB8B:SMAD3:MEF2A:ROCK1:DSG2:CTDP1:SH3GL1:S1PR2:PRKACA:HOMER3:CALM3:ROCK2:SLC8A1:CALM2:GLS:BMPR2:SNX5:MYL9:ZMYND8:APP:PPARA:TYMP:ITPR1:LMCD1:THRB:GNAI2:PPP3CA:IL6ST:PDE4D:HOMER1:EDN1:JARID2:AIF1:TNFRSF21:GJA1:CTGF:SGK1:UTRN:CAV1:PTK2B:ASPH:FBXO32:JAK2:NOTCH1:DMD:FLNA
GO_NEUTROPHIL_MIGRATION	38	20	1.69352e-05	0.000723686	S100A12:FCER1G:ADAM8:C3AR1:NCKAP1L:LGALS3:CKLF:CCL2:PIP5K1C:PREX1:ITGB2:RAC2:WDR1:SLIT2:ITGA1:PDE4D:CD74:EDN1:RAC1:SYK
GO_POSITIVE_REGULATION_OF_CHEMOTAXIS	59	27	1.75943e-05	0.000747506	F3:IL6R:C3AR1:ANO6:NCKAP1L:CMKLR1:HMGB1:GAS6:THBS1:SMAD3:MAPK3:STX4:LGALS9:BMPR2:TIAM1:RAC2:OXSR1:CCR1:WNT5A:SLIT2:CD74:EDN1:AIF1:MAPK14:VEGFA:RAC1:PTK2B
GO_POSITIVE_REGULATION_OF_ERK1_AND_ERK2_CASCADE	75	32	1.81547e-05	0.000763147	PLA2G2A:JUN:RAP1A:SHC1:PTPRC:DSTYK:CD44:PHB2:LRP1:RAP1B:HMGB1:SPRY2:GAS6:MAP2K1:NPTN:MAPK3:ARRB2:LGALS9:CCL2:CFLAR:BMP2:APP:CCR1:GNAI2:PDGFRA:CD74:CTGF:PDGFA:PTK2B:TLR4:ABL1:NOTCH1
GO_REGULATION_OF_EXTRACELLULAR_MATRIX_ORGANIZATION	22	14	1.81702e-05	0.000763147	TNFRSF1B:ETS1:TNFRSF1A:LRP1:RB1:SMAD3:ANTXR1:CLASP1:DPP4:CFLAR:CST3:FSCN1:ABL1:NOTCH1
GO_REGULATION_OF_CYTOSOLIC_CALCIUM_ION_CONCENTRATION	95	38	1.87756e-05	0.000779953	GNB1:ABL2:PTPRC:ATP2B4:C3AR1:ITPR2:LRP1:ATP2B1:CMKLR1:HMGB1:LPAR6:ERO1L:SMAD3:NPTN:PML:PKD1:GNA13:PRKACA:CALM3:BAX:FPR1:SLC8A1:CALM2:CXCR4:FKBP1A:ITPR1:CCR1:WNT5A:PDGFRA:PDE4D:EDN1:IBTK:FYN:CAV1:PTK2B:JAK2:ABL1:DMD
GO_POSITIVE_REGULATION_OF_LEUKOCYTE_MIGRATION	53	25	1.87825e-05	0.000779953	PTAFR:IL6R:ADAM8:C3AR1:ANO6:NCKAP1L:CMKLR1:HMGB1:GAS6:LGALS3:THBS1:MAPK3:LGALS9:APP:RAC2:OXSR1:CCR1:WNT5A:CD74:EDN1:AIF1:MAPK14:VEGFA:RAC1:PTK2B
GO_RESPONSE_TO_ORGANIC_CYCLIC_COMPOUND	458	133	1.93227e-05	0.000797874	GNB1:KIF1B:MTHFR:PTAFR:JUN:PRKACB:RAP1A:SELL:ATP2B4:TOMM20:HNRNPU-AS1:HNRNPU:DDIT4:LDHA:CAT:CRY2:MDK:RELA:CPT1A:CCND1:FOLR2:YAP1:BIRC2:CBL:ETS1:PHB2:KRAS:ITPR2:NR4A1:CALCOCO1:CDK4:RAP1B:DUSP6:ATP2B1:LUM:SSH1:PEBP1:NCOR2:FOXO1:RB1:NFATC4:NFKBIA:ZFP36L1:FOS:THBS1:PIAS1:IREB2:ABHD2:EEF2K:MAPK3:LONP2:GOT2:ARRB2:PER1:CCL2:RARA:STAT3:NFE2L1:COL1A1:NME1:DDX5:RIOK3:DSG2:KANK2:JUNB:PRKACA:KLF2:GPI:PAK4:ZF…
GO_RESPONSE_TO_INTERFERON_ALPHA	15	11	2.03925e-05	0.000837346	ADAR:IFIT2:IFIT3:IFITM2:IFITM3:GAS6:BST2:AXL:EIF2AK2:IFNAR2:AP000295,9:IFNAR1
GO_CYTOKINE_SECRETION	92	37	2.08793e-05	0.000852573	TNFRSF1B:GBP1:CD58:S100A12:S100A13:SRGN:LRRC32:CASP1:LRP1:HMGB1:GAS6:PML:SOCS1:IL4R:MAPK3:LGALS9:CARD8:SPTBN1:IL1R2:IL1RL1:ITGB6:MAVS:FERMT1:IL17RA:WNT5A:FOXP1:RBPJ:LCP2:AIF1:MAPK14:TNFRSF21:TNFAIP3:DDX58:SYK:TLR4:ABL1:NOTCH1
GO_EPITHELIAL_TUBE_MORPHOGENESIS	159	56	2.19248e-05	0.000890315	DVL1:SKI:CTNNBIP1:MTHFR:EPHA2:LUZP1:PHACTR4:TACSTD2:PRKACB:PBX1:ILK:YAP1:PHB2:KRAS:CEP290:KDM2B:TMED2:SPRY2:EFNB2:COL4A1:NFATC4:HIF1A:SMAD3:PML:PKD1:PFN1:RARA:GNA13:PRKACA:VASP:ZEB2:BMP2:SDC4:CTSZ:PLXNB2:TGFBR2:SETD2:WNT5A:FOXP1:PLXND1:NPHP3:SLIT2:RBPJ:SHROOM3:IRX2:MEF2C:EDN1:PTK7:VEGFA:RALA:WNT2:CTHRC1:MYC:ABL1:NOTCH1:PRKX
GO_POSITIVE_REGULATION_OF_PROTEIN_METABOLIC_PROCESS	870	231	2.29279e-05	0.000925934	DVL1:CAMTA1:TNFRSF1B:PLA2G2A:PTAFR:JUN:GADD45A:PRKACB:CYR61:F3:RAP1A:S100A12:HAX1:IL6R:SHC1:ARHGEF2:IFI16:SOAT1:FAM129A:PTPRC:ATP2B4:DSTYK:MAPKAPK2:PPP2R5A:VIM:CCNY:UBE2D1:DUSP5:ADAM8:CD81:ILK:SVIP:CD44:RPS6KA4:RELA:CCND1:CTSC:MRE11A:BIRC2:CASP1:ATM:KMT2A:RPUSD4:CCND2:TNFRSF1A:PHB2:KRAS:NCKAP1L:LRP1:CDK4:RAP1B:OSBPL8:DUSP6:MAPKAPK5:CAMKK2:HMGB1:SPRY2:GAS6:NFKBIA:MAP4K5:SAMD4A:ATXN3:APOPT1:THBS1:E…
GO_REGULATION_OF_LEUKOCYTE_PROLIFERATION	89	36	2.31765e-05	0.000930858	TNFRSF1B:VCAM1:IL6R:MNDA:PTPRC:CD81:LRRC32:ATM:NCKAP1L:HMGB1:TNFSF13B:LGALS3:LGALS9:TYROBP:SLC39A10:INPP5D:SDC4:NFATC2:RAC2:TGFBR2:SH3RF1:IL6ST:MEF2C:IRF1:CD74:HLA-E:LST1:AIF1:HLA-DPA1:HLA-DPB1:TNFRSF21:TNFAIP3:SYK:TLR4:VSIG4:EFNB1
GO_ACTIN_POLYMERIZATION_OR_DEPOLYMERIZATION	127	47	2.34388e-05	0.000936279	CAPZA1:HAX1:ADD3:FCHSD2:EPS8:NCKAP1L:SSH1:CFL2:EVL:TMOD3:C15orf38:PFN1:GAS7:SSH2:GRB2:PSTPIP2:GMFG:VASP:MYADM:CDC42EP3:SPTBN1:ACTR2:PLEK:CAPG:WIPF1:HCK:PREX1:CDC42EP1:TWF2:PRKCD:HCLS1:ADD1:WDR1:SLIT2:FER:FCHSD1:LRRC16A:AIF1:ARHGAP18:RAC1:PPP1R9A:ARPC1B:CAPZA2:PTK2B:JAK2:SPTAN1:WAS
GO_ASTROCYTE_DIFFERENTIATION	33	18	2.36515e-05	0.000939667	C1QA:VIM:KRAS:LRP1:MAP2K1:MAPK3:STAT3:LDLR:ID2:BMP2:APP:MAPK1:IL6ST:ID4:CDK6:TLR4:ABL1:NOTCH1
GO_POSITIVE_REGULATION_OF_CHEMOKINE_PRODUCTION	25	15	2.49893e-05	0.000982198	IL6R:LRP1:HIF1A:IL4R:LGALS9:EIF2AK2:IL1RL1:MAVS:APP:HMOX1:WNT5A:EGR1:CD74:AIF1:TLR4
GO_COLLAGEN_FIBRIL_ORGANIZATION	25	15	2.49893e-05	0.000982198	PLOD1:P4HA1:SERPINH1:LUM:RB1:LEPREL4:COL1A1:CYP1B1:COL3A1:COL5A2:PLOD2:FOXC1:COL1A2:LOXL2:COL5A1
GO_NEGATIVE_REGULATION_OF_BIOMINERAL_TISSUE_DEVELOPMENT	13	10	2.53586e-05	0.000991414	SRGN:GAS6:HIF1A:FAM101B:ROCK1:ROCK2:CCR1:PTK2B:NOTCH1:BCOR
GO_NEGATIVE_REGULATION_OF_IMMUNE_SYSTEM_PROCESS	208	69	2.56891e-05	0.00099902	C1QC:GBP1:MNDA:IFI16:CD84:FCER1G:PTPRC:CUEDC2:LRRC32:ATM:STAT6:HMGB1:NFKBIA:LGALS3:ZFP36L1:KLF13:MEIS2:THBS1:FBN1:SOCS1:IL4R:ARRB2:CD68:LGALS9:CCL2:RARA:NME1:SEC14L1:RIOK3:LDLR:BST2:TYROBP:ZFP36:AXL:ID2:IL1RL1:MERTK:NMI:COL3A1:INPP5D:TRAF3IP1:SAMHD1:MAFB:SDC4:SAMSN1:HMOX1:APPL1:PARP14:SLIT2:PIK3R1:FER:IRF1:CD74:DUSP22:HLA-E:LST1:TNFRSF21:TNFAIP3:CDK6:TMEM176B:PTK2B:PAG1:TRIB1:MYC:TLR4:NOTCH1:VSIG…
GO_ERK1_AND_ERK2_CASCADE	131	48	2.60566e-05	0.00100075	EPHA2:PLA2G2A:JUN:CYR61:GBP1:RAP1A:SHC1:PTPRC:DSTYK:CD44:PHB2:LRP1:RAP1B:DUSP6:HMGB1:SPRY2:GAS6:STYX:ZFP36L1:SPRED1:MAP2K1:NPTN:MAPK3:ARRB2:LGALS9:CCL2:RRAS:ITGB1BP1:ZFP36L2:CFLAR:SIRPA:BMP2:APP:TIAM1:MAPK1:CCR1:GNAI2:PDGFRA:CD74:TNIP1:CTGF:PDGFA:PTK2B:MYC:SYK:TLR4:ABL1:NOTCH1
GO_TISSUE_MORPHOGENESIS	328	100	2.61651e-05	0.00100075	DVL1:SKI:CTNNBIP1:MTHFR:EPHA2:LUZP1:PHACTR4:TACSTD2:PRKACB:CYR61:RHOC:PBX1:EGLN1:ARHGAP12:ITGB1:VCL:ACTA2:CD151:ILK:CD44:YAP1:PHB2:KRAS:CEP290:KDM2B:TMED2:SPRY2:EFNB2:COL4A1:NFATC4:HIF1A:SMAD3:FEM1B:PML:PKD1:ARRB2:PFN1:KDM6B:RARA:SMURF2:GNA13:GRB2:SOCS3:PRKACA:GPI:VASP:RAB10:PSME4:CLASP1:ZEB2:COL3A1:BMPR2:NRP2:COL6A3:TRAF3IP1:FKBP1A:BMP2:SDC4:CTSZ:TIAM1:COL6A1:COL6A2:PLXNB2:TGFBR2:SETD2:COL7A1:WN…
GO_POSITIVE_REGULATION_OF_CATALYTIC_ACTIVITY	748	202	2.62311e-05	0.00100075	EPHA2:PTAFR:PHACTR4:SMAP2:JUN:GADD45A:DNAJB4:PRKACB:CYR61:ARHGAP29:F3:RAP1A:RHOC:APH1A:S100A10:S100A12:IL6R:SHC1:IFI16:ARHGAP30:ATP1B1:ABL2:NCF2:RGS2:PTPRC:PPP1R12B:ATP2B4:DSTYK:MAPKAPK2:HNRNPU-AS1:HNRNPU:ARHGAP21:ARHGAP12:ITGB1:CCNY:DUSP5:ADAM8:RIC8A:CD81:ILK:ARHGAP1:CCND1:ARAP1:MRE11A:CASP1:SORL1:CCND2:KRAS:NCKAP1L:SRGAP1:OSBPL8:DUSP6:GIT2:MAPKAPK5:GCN1L1:HMGB1:ALOX5AP:DNAJC15:SPRY2:GAS6:MAP4K5…
GO_MONONUCLEAR_CELL_DIFFERENTIATION	20	13	2.63435e-05	0.00100075	CTNNBIP1:JUN:IFI16:ZFP36L1:INPP5D:THOC5:MYH9:FOXP1:MEF2C:CD74:VEGFA:CDK6:MYC
GO_POSITIVE_REGULATION_OF_CELL_POPULATION_PROLIFERATION	412	121	2.64143e-05	0.00100075	PTAFR:SSBP3:JUN:CYR61:F3:VCAM1:HIPK1:S100A13:IL6R:SHC1:PBX1:LAMC2:PTPRC:RNF187:HNRNPU-AS1:HNRNPU:ITGB1:ZMIZ1:CD81:ILK:RELA:CCND1:FOLR2:YAP1:ETS1:CCND2:FOXJ2:KRAS:NR4A1:NCKAP1L:CDK4:NAP1L1:HMGB1:RNASEH2B:EFNB2:TNFSF13B:GAS6:HIF1A:MEIS2:THBS1:CCPG1:PML:IGF1R:STX4:LGALS9:RARA:STAT3:NME1:MAP3K3:S1PR2:ID2:ITGB1BP1:FOSL2:LBH:DPP4:ATF2:SLC39A10:CFLAR:BMPR2:NRP2:CDC25B:BMP2:HCK:RPRD1B:NFATC2:CTSZ:ADAMTS1…
GO_ACTIN_FILAMENT_POLYMERIZATION	110	42	2.6627e-05	0.00100233	CAPZA1:HAX1:ADD3:FCHSD2:EPS8:NCKAP1L:EVL:TMOD3:C15orf38:PFN1:GAS7:GRB2:PSTPIP2:GMFG:VASP:MYADM:CDC42EP3:SPTBN1:ACTR2:CAPG:WIPF1:HCK:PREX1:CDC42EP1:TWF2:PRKCD:HCLS1:ADD1:SLIT2:FER:FCHSD1:LRRC16A:AIF1:ARHGAP18:RAC1:PPP1R9A:ARPC1B:CAPZA2:PTK2B:JAK2:SPTAN1:WAS
GO_TRANSMEMBRANE_RECEPTOR_PROTEIN_TYROSINE_KINASE_SIGNALING_PATHWAY	400	118	2.67287e-05	0.00100233	EPHA2:F3:APH1A:SHC1:MPZL1:ANGPTL1:NCF2:DSTYK:MAPKAPK2:EIF4EBP2:DDIT4:MYOF:BLNK:SHOC2:PTPRE:POLR2L:CREB3L1:RELA:ARAP1:SIK2:CBL:EPS8:HNRNPA1:NCKAP1L:LRP1:CDK4:OSBPL8:DCN:PXN:FOXO1:SPRY2:EFNB2:COL4A1:COL4A2:NFATC4:HIF1A:NDN:SPRED1:THBS1:NPTN:IGF1R:SOCS1:PRKCB:SH2B1:MVP:MAPK3:POLR2A:EPN2:IGFBP4:STAT3:COL1A1:GRB2:SOCS3:ROCK1:RNF126:POLR2E:EPS15L1:AXL:PLAUR:AKT1S1:NUP62:ROCK2:RHOQ:ACTR2:MERTK:POLR2D:PT…
GO_REGULATION_OF_CELL_DEVELOPMENT	445	129	2.8307e-05	0.00105079	DVL1:SKI:C1QA:MACF1:MYCL:LEPRE1:TACSTD2:GBP1:RAP1A:S100A10:ARHGEF2:PBX1:ABL2:RGS2:RAB7L1:PLXNA2:VIM:KIAA1598:ILK:DENND5A:RELA:YAP1:DIXDC1:SORL1:TNFRSF1A:BHLHE41:LRP1:LLPH:NAP1L1:PLXNC1:SSH1:EFNB2:NFATC4:HIF1A:NUMB:EIF2AK4:B2M:FBN1:MAP2K1:NPTN:HMG20A:EEF2K:ZFHX3:FAM101B:PMP22:SSH2:RARA:STAT3:SPAG9:NME1:CSNK1D:ROCK1:CTDP1:STK11:TCF3:S1PR2:LDLR:TYROBP:MYADM:ID2:ITGB1BP1:ROCK2:ITSN2:NCOA1:CCDC88A:ACT…
GO_REGULATION_OF_ADAPTIVE_IMMUNE_RESPONSE	70	30	2.9702e-05	0.00109703	TNFRSF1B:IL6R:FCER1G:PTPRC:STAT6:UNG:HMGB1:TNFSF13B:EIF2AK4:B2M:IL4R:EXOSC6:MALT1:PVR:MSH2:IL1RL1:SLC11A1:SAMSN1:NFKBIZ:WHSC1:IL6ST:MEF2C:IRF1:DUSP22:HLA-A:HLA-E:HLA-B:TNFAIP3:FAM49B:WAS
GO_REGULATION_OF_T_CELL_ACTIVATION	146	52	3.01403e-05	0.00110766	TNFRSF1B:VCAM1:IL6R:PTPRC:SOX13:ZMIZ1:ADAM8:LRRC32:NCKAP1L:HMGB1:HSPH1:EFNB2:TNFSF13B:LGALS3:SOCS1:IL4R:CYLD:LGALS9:CCL2:RARA:GRB2:MALT1:DPP4:SIRPA:SDC4:NFATC2:RAC2:LGALS1:TGFBR2:NFKBIZ:PIK3CA:SH3RF1:IL6ST:PIK3R1:IRF1:CD74:PRELID1:DUSP22:HLA-E:AIF1:HLA-DPA1:HLA-DPB1:TNFRSF21:FYN:RAC1:CAV1:PAG1:FAM49B:SYK:ABL1:VSIG4:EFNB1
GO_POSITIVE_REGULATION_OF_TRANSFERASE_ACTIVITY	349	105	3.06147e-05	0.00111949	GADD45A:PRKACB:CYR61:RAP1A:S100A12:IL6R:SHC1:PTPRC:ATP2B4:DSTYK:MAPKAPK2:CCNY:DUSP5:ADAM8:CD81:ILK:CCND1:MRE11A:SORL1:CCND2:KRAS:NCKAP1L:OSBPL8:DUSP6:MAPKAPK5:GCN1L1:SPRY2:GAS6:MAP4K5:THBS1:MAP2K1:PKD1:TRAF7:SOCS1:DCUN1D3:MAPK3:UNC119:SPAG9:MAP3K3:MALT1:STK11:GADD45B:S1PR2:PRKACA:PAK4:CALM3:FPR1:ITGB1BP1:EIF2AK2:CALM2:CCDC88A:MAP4K4:CXCR4:ZEB2:MLTK:CCNYL1:SLC11A1:CAB39:COPS8:STK25:CDC25B:BMP2:SDC…
GO_POSITIVE_REGULATION_OF_CELL_SUBSTRATE_ADHESION	67	29	3.20955e-05	0.00116783	CYR61:S100A10:ILK:HSD17B12:ARL2:SMAD3:ROCK1:MYADM:ITGB1BP1:MAP4K4:LIMS1:ITGA6:FERMT1:SDC4:PREX1:FBLN2:CCDC80:RREB1:NEDD9:LRRC16A:VEGFA:UTRN:RAC1:CDK6:PTK2B:PLEKHA2:JAK2:ABL1:FLNA
GO_REGULATION_OF_B_CELL_ACTIVATION	64	28	3.45054e-05	0.00124933	MNDA:PTPRC:CD81:ATM:NCKAP1L:STAT6:UNG:TNFSF13B:ZFP36L1:IGHM:CYLD:EXOSC6:TYROBP:ID2:ZFP36L2:MSH2:SLC39A10:INPP5D:NFATC2:SAMSN1:WHSC1:MEF2C:CD74:TNFRSF21:TNFAIP3:SYK:TLR4:ATP11C
GO_LYMPHOCYTE_MEDIATED_IMMUNITY	101	39	3.80269e-05	0.00136948	TNFRSF1B:C1QA:C1QC:C1QB:FCER1G:PTPRC:CD81:CTSC:C1S:STAT6:UNG:HMGB1:IGHM:B2M:RAB27A:IL4R:EXOSC6:ARRB2:LGALS9:MALT1:POU2F2:PVR:BCL3:MSH2:SLC11A1:INPP5D:PRKCD:RNF168:WHSC1:CD74:DUSP22:HLA-A:HLA-E:GNL1:TUBB:HLA-B:NBN:FAM49B:WAS
GO_REGULATION_OF_CELL_SUBSTRATE_ADHESION	122	45	3.81964e-05	0.00136948	MACF1:TACSTD2:CYR61:GBP1:S100A10:ADAM15:ILK:HSD17B12:ARL2:LRP1:ATXN3:THBS1:SMAD3:COL1A1:ROCK1:MYADM:ITGB1BP1:ROCK2:MAP4K4:LIMS1:CLASP1:ITGA6:FERMT1:SDC4:PREX1:RAC2:LGALS1:FBLN2:CCDC80:PIK3R1:DUSP22:RREB1:NEDD9:LRRC16A:VEGFA:UTRN:RAC1:CDK6:PTK2B:PLEKHA2:JAK2:ABL1:NOTCH1:CASK:FLNA
GO_MUSCLE_STRUCTURE_DEVELOPMENT	284	88	4.11361e-05	0.00146772	SKI:PLEKHO1:RGS2:CENPF:CAPN2:EGLN1:HNRNPU-AS1:HNRNPU:SVIL:ITGB1:MYOF:ILK:YAP1:TAGLN:KRAS:BHLHE41:DCN:RB1:EFNB2:NFATC4:CFL2:ZFP36L1:FOS:TMOD3:SMAD3:PIAS1:MEF2A:MYH11:IL4R:ZFHX3:ARRB2:KDM6B:COPRS:RARA:SPAG9:DDX5:CTDP1:TCF3:SLC8A1:COL3A1:CFLAR:CREB1:COL6A3:GPC1:FKBP1A:GPCPD1:BMP2:NFATC2:MAPK1:MYH9:LGALS1:PPARA:TGFBR2:WNT5A:FLNB:HEG1:MBNL1:WDR1:RBPJ:PDGFRA:PPP3CA:SORBS2:BASP1:HOMER1:MEF2C:EGR1:MAML1:…
GO_REGULATION_OF_IMMUNE_EFFECTOR_PROCESS	177	60	4.19432e-05	0.00148929	TNFRSF1B:C1QA:C1QC:C1QB:PTAFR:RAP1A:CD84:FCER1G:PTPRC:CUEDC2:CD81:BIRC2:C1S:C3AR1:STAT6:UNG:HMGB1:LGALS3:EIF2AK4:B2M:IL4R:MAPK3:STX4:EXOSC6:ARRB2:LGALS9:RARA:SEC14L1:RIOK3:MALT1:BST2:GPI:PVR:MSH2:TRAF3IP1:MAVS:ITGB2:HMOX1:RAC2:WNT5A:APPL1:NFKBIZ:PARP9:DTX3L:WHSC1:FER:CD74:DUSP22:HLA-A:HLA-E:HLA-B:MAPK14:TNFAIP3:FAM49B:DDX58:SYK:TLR4:WAS:VSIG4:TSPAN6
GO_T_CELL_PROLIFERATION	81	33	4.22818e-05	0.00149409	TNFRSF1B:VCAM1:IL6R:PTPRC:CD151:LRRC32:NCKAP1L:HMGB1:TNFSF13B:LGALS3:LGALS9:MALT1:BAX:SLC11A1:SDC4:RAC2:TGFBR2:SH3RF1:IL6ST:IRF1:HLA-E:AIF1:HLA-DPA1:HLA-DPB1:CCND3:TNFRSF21:FYN:SYK:ABL1:MSN:VSIG4:EFNB1:ELF4
GO_MYELOID_CELL_HOMEOSTASIS	98	38	4.27445e-05	0.00149606	ISG15:FCER1G:AMPD3:ETS1:NCKAP1L:HMGB1:RB1:HIF1A:ZFP36L1:KLF13:B2M:TMOD3:IREB2:STAT3:NFE2L1:DNASE2:KLF2:GPI:ZFP36:AXL:BAX:ID2:MERTK:ACVR2A:INPP5D:MAFB:HMOX1:RBFOX2:HCLS1:ADD1:HMGB2:MAPK14:VEGFA:CDK6:KMT2E:HIPK2:JAK2:PTBP3
GO_ACTOMYOSIN_STRUCTURE_ORGANIZATION	98	38	4.27445e-05	0.00149606	TACSTD2:RHOC:S100A10:CDC42BPA:ITGB1:ARAP1:PXN:CFL2:EVL:TMOD3:SMAD3:MEF2A:MYH11:FHOD1:PFN1:ROCK1:CNN2:ITGB1BP1:ROCK2:CLASP1:CFLAR:EPB41L1:SDC4:MYH9:WDR1:PDGFRA:PIK3R1:MEF2C:EPB41L4A:EDN1:LRRC16A:CTGF:RAC1:PPP1R9A:ZYX:PTK2B:ABL1:WAS
GO_REGULATION_OF_LEUKOCYTE_CHEMOTAXIS	49	23	4.44752e-05	0.00154925	IL6R:C3AR1:ANO6:NCKAP1L:CMKLR1:HMGB1:GAS6:THBS1:MAPK3:LGALS9:CCL2:RAC2:OXSR1:CCR1:WNT5A:SLIT2:CD74:EDN1:AIF1:MAPK14:VEGFA:RAC1:PTK2B
GO_RESPONSE_TO_CAMP	46	22	4.5353e-05	0.00157238	PTAFR:JUN:RAP1A:LDHA:RELA:BIRC2:ITPR2:RAP1B:PEBP1:ZFP36L1:FOS:EEF2K:PER1:COL1A1:NME1:JUNB:FOSB:SLC8A1:PNPT1:APP:SPARC:PTK2B
GO_RESPONSE_TO_INORGANIC_SUBSTANCE	281	87	4.6961e-05	0.00162048	C1QA:JUN:VCAM1:SLC25A24:S100A16:S100A13:ATP2B4:CAPN2:EGLN1:MTR:BNIP3:LDHA:CAT:RELA:CCND1:ETS1:CD9:HNRNPA1:STAT6:CDK4:PEBP1:ALOX5AP:FOXO1:NFATC4:HIF1A:FOS:FBLN5:THBS1:B2M:IREB2:MEF2A:EEF2K:MAPK3:FUS:MT2A:KDM6B:NFE2L1:COL1A1:JUNB:KLF2:GPI:AXL:FOSB:PPP5C:CALM3:SEPW1:ID2:CYP1B1:SLC8A1:CALM2:CYBRD1:ATF2:CFLAR:CREB1:ANKZF1:STK25:SIRPA:APP:MAPK1:SELM:HMOX1:TSPO:PRKCD:WNT5A:ADD1:QDPR:SOD3:PPP3CA:HOMER1:M…
GO_RESPONSE_TO_KETONE	95	37	4.79964e-05	0.00164847	GNB1:KIF1B:PTAFR:ADAM15:DDIT4:RELA:CCND1:YAP1:CBL:CDK4:ATP2B1:PEBP1:FOXO1:FOS:THBS1:ABHD2:NME1:DSG2:KLF2:GPI:FOSB:CALM3:ROCK2:NCOA1:CFLAR:TSPO:GLB1:SLIT2:IGFBP7:SPP1:NR3C1:EDN1:CAV1:FBXO32:HSF1:CYBB:MSN
GO_NEURON_DIFFERENTIATION	620	170	4.99732e-05	0.00170839	DVL1:SKI:RERE:EPHA2:C1QA:LYPLA2:MACF1:MYCL:LEPRE1:JUN:NEXN:VCAM1:RAP1A:HIPK1:SHC1:ARHGEF2:PBX1:ABL2:RGS2:RAB7L1:PLXNA2:ENAH:MTR:VIM:ITGB1:DDIT4:VCL:BLOC1S2:ARL3:KIAA1598:CDKN1C:ILK:DENND5A:B3GNT1:TSKU:MTMR2:DIXDC1:ZNF259:NCKAP1L:LRP1:LLPH:CEP290:PLXNC1:SSH1:HMGB1:RB1:FARP1:EFNB2:NFATC4:HIF1A:NUMB:EVL:NDN:EIF2AK4:B2M:BLOC1S6:MAP2K1:NPTN:HMG20A:MEF2A:EEF2K:MAPK3:CDH11:ZFHX3:GAS7:PMP22:SSH2:RARA:STA…
GO_EMBRYO_DEVELOPMENT_ENDING_IN_BIRTH_OR_EGG_HATCHING	317	96	5.05571e-05	0.00172035	DVL1:SKI:MTHFR:EPHA2:ECE1:LUZP1:WDTC1:PHACTR4:SSBP3:SLC35D1:PRKACB:CYR61:PBX1:PLXNA2:CAPN2:EGLN1:KIAA1217:ITGB1:ZMIZ1:RIC8A:CDKN1C:WDR74:ZNF259:BHLHE41:MED21:KDM2B:TMED2:LPAR6:RNASEH2B:HIF1A:ZFP36L1:MAP2K1:SMAD3:PKD1:XYLT1:CMTM3:PFN1:USP22:RARA:PLCD3:COL1A1:GNA13:GRB2:SOCS3:DSC3:JUNB:PRKACA:KLF2:GPI:VASP:NCOA1:MSH2:HS6ST1:PTPN18:ZEB2:ACVR2A:BMPR2:TRAF3IP1:BMP2:POFUT1:SDC4:MAPK1:MYH9:PLXNB2:TGFBR2…
GO_ERYTHROCYTE_HOMEOSTASIS	85	34	5.09332e-05	0.00172516	ISG15:AMPD3:ETS1:NCKAP1L:RB1:HIF1A:ZFP36L1:KLF13:B2M:TMOD3:IREB2:STAT3:NFE2L1:DNASE2:KLF2:GPI:ZFP36:AXL:ID2:ACVR2A:INPP5D:MAFB:HMOX1:RBFOX2:HCLS1:ADD1:HMGB2:MAPK14:VEGFA:CDK6:KMT2E:HIPK2:JAK2:PTBP3
GO_REGULATION_OF_CELLULAR_COMPONENT_BIOGENESIS	512	144	5.17468e-05	0.00174467	CTNNBIP1:EPHA2:MACF1:TACSTD2:CYR61:ODF2L:SH3GLB1:DR1:FNBP1L:RAP1A:CAPZA1:RHOC:CHD1L:S100A10:HAX1:ARHGEF2:HNRNPU-AS1:HNRNPU:FAM178A:ADD3:SVIP:ARL2:NUMA1:ARAP1:FCHSD2:BIRC2:ATM:SORL1:TNFRSF1A:EPS8:NCKAP1L:LRP1:RAP1B:SSH1:PXN:GTF2H3:HMGB1:DNAJC15:RB1:EVL:WARS:THBS1:TMOD3:SMAD3:DNAJA4:C15orf38:CCP110:EEF2K:CYLD:FHOD1:ATMIN:PIEZO1:PFN1:SMCR8:SSH2:PLEKHM1:SNF8:GRB2:SEPT9:ROCK1:RIOK3:NCLN:PRKACA:GMFG:VA…
GO_B_CELL_DIFFERENTIATION	62	27	5.238e-05	0.00175796	VCAM1:PTPRC:KLF6:ITGB1:BLNK:ATM:ITFG2:NCKAP1L:ZFP36L1:CYLD:MALT1:TCF3:POU2F2:BCL3:BAX:ID2:ZFP36L2:MSH2:INPP5D:LGALS1:RBPJ:PIK3R1:POLM:PTK2B:SYK:ABL1:ATP11C
GO_REGULATION_OF_PROTEIN_AUTOPHOSPHORYLATION	29	16	5.60669e-05	0.00186638	JUN:PTPRC:PPP2R5A:MRE11A:PPP2R5C:EEF2K:MVP:CALM3:CALM2:RAP2B:PPP2R5D:VEGFA:ENPP1:PDGFA:CAV1:NBN
GO_CELLULAR_RESPONSE_TO_ACID_CHEMICAL	106	40	5.61182e-05	0.00186638	GNB1:PTAFR:LAMTOR5:ABL2:CAPN2:CPT1A:FOLR2:YAP1:ATM:PHB2:CDK4:COL4A1:NFATC4:IREB2:SOCS1:RARA:COL1A1:NME1:LDLR:KLF2:COL3A1:COL5A2:CREB1:COL6A1:TWF2:WNT5A:PDGFRA:EGR1:LARS:EDN1:UBR2:PTK7:VEGFA:FYN:COL1A2:WNT2:PTK2B:HSF1:SETX:CYBB
GO_NEURON_DEVELOPMENT	522	146	6.1811e-05	0.00204645	DVL1:SKI:RERE:EPHA2:C1QA:LYPLA2:MACF1:LEPRE1:JUN:NEXN:RAP1A:SHC1:ABL2:RGS2:RAB7L1:PLXNA2:ENAH:MTR:VIM:ITGB1:VCL:BLOC1S2:ARL3:KIAA1598:CDKN1C:ILK:DENND5A:B3GNT1:TSKU:MTMR2:ZNF259:NCKAP1L:LRP1:LLPH:CEP290:PLXNC1:SSH1:HMGB1:RB1:FARP1:EFNB2:NFATC4:NUMB:EVL:NDN:EIF2AK4:B2M:BLOC1S6:MAP2K1:NPTN:MEF2A:EEF2K:MAPK3:CDH11:GAS7:PMP22:SSH2:NME1:GRB2:ROCK1:STK11:PAK4:VASP:ID2:ITSN2:RAB10:SPTBN1:CCDC88A:B3GNT2:…
GO_B_CELL_PROLIFERATION	32	17	6.25263e-05	0.00206084	MNDA:PTPRC:CD81:ATM:NCKAP1L:TNFSF13B:TYROBP:BAX:SLC39A10:INPP5D:NFATC2:PRKCD:MEF2C:CD74:TNFRSF21:TLR4:ABL1
GO_POSITIVE_REGULATION_OF_PROTEIN_SERINE_THREONINE_KINASE_ACTIVITY	183	61	6.35683e-05	0.00208583	GADD45A:S100A12:SHC1:PTPRC:ATP2B4:MAPKAPK2:CCNY:DUSP5:ADAM8:CD81:ILK:CCND1:CCND2:KRAS:DUSP6:MAPKAPK5:SPRY2:MAP4K5:THBS1:MAP2K1:PKD1:TRAF7:MAPK3:SPAG9:MAP3K3:GADD45B:S1PR2:CALM3:FPR1:EIF2AK2:CALM2:CXCR4:ZEB2:MLTK:CCNYL1:CAB39:BMP2:TIAM1:MAPK1:WNT5A:ACSL1:ITGA1:MAP3K1:CD74:RIPK1:EDN1:MAPK14:CCND3:VEGFA:MAP3K5:RP1-111D6,3:TAB2:PDGFA:MDFIC:EZH2:PTK2B:ADAM9:C8orf4:JAK2:SYK:TLR4:IRAK1
GO_REGULATION_OF_CELL_PROJECTION_ORGANIZATION	339	101	6.64454e-05	0.00217055	DVL1:EPHA2:MACF1:LEPRE1:TACSTD2:ODF2L:FNBP1L:RAP1A:ABL2:RGS2:RAB7L1:PLXNA2:VIM:KIAA1598:ILK:DENND5A:CD44:ARAP1:EPS8:LRP1:LLPH:PLXNC1:SSH1:SPRY2:EFNB2:NFATC4:EVL:B2M:RAB8B:MAP2K1:NPTN:C15orf38:CCP110:EEF2K:CYLD:ATMIN:PFN1:PMP22:SSH2:PLEKHM1:NME1:SEPT9:STK11:ITSN2:CDC42EP3:RHOQ:CCDC88A:ACTR2:MAP4K4:TTL:ZEB2:CFLAR:BMPR2:STK25:ZMYND8:PREX1:CTSZ:TIAM1:YWHAH:RAC2:CDC42EP1:LGALS1:PLXNB2:SS18L2:MAP4:TWF2…
GO_CHEMOKINE_PRODUCTION	38	19	6.95146e-05	0.00224825	EPHA2:IL6R:SIGIRR:LRP1:HIF1A:IL4R:LGALS9:EIF2AK2:IL1RL1:SIRPA:MAVS:APP:HMOX1:WNT5A:FOXP1:EGR1:CD74:AIF1:TLR4
GO_RESPONSE_TO_FIBROBLAST_GROWTH_FACTOR	76	31	6.96861e-05	0.00224825	DSTYK:SHOC2:POLR2L:CD44:CREB3L1:CBL:NR4A1:HNRNPA1:SPRY2:ZFP36L1:SPRED1:THBS1:NPTN:MAPK3:POLR2A:CCL2:COL1A1:GRB2:POLR2E:ZFP36:ITGB1BP1:ZFP36L2:POLR2D:GPC1:MAPK1:RBFOX2:WNT5A:NDST1:CTGF:POLR2J:SETX
GO_REGULATION_OF_CELL_DEATH	888	232	6.97415e-05	0.00224825	NOC2L:DFFA:TNFRSF1B:C1QA:EYA3:AGO4:JUN:GADD45A:CYR61:F3:SLC25A24:LAMTOR5:APH1A:MCL1:HAX1:SHC1:ARHGEF2:MNDA:FCER1G:KIFAP3:PTPRC:DSTYK:RAB7L1:CAPN2:TP53BP2:EGLN1:ITGB1:DDIT4:IFIT2:IFIT3:BNIP3:ADAM8:ILK:MTRNR2L8:LDHA:CAT:CD44:API5:CREB3L1:MDK:FTH1:RELA:CTSC:MRE11A:YAP1:BIRC2:CASP1:ATM:ZNF259:CBL:SORL1:CCND2:TNFRSF1A:PHB2:KRAS:TM7SF3:ANO6:NCKAP1L:LRP1:CDK4:RASSF3:DUSP6:SSH1:UNG:KDM2B:RILPL1:HMGB1:FOX…
GO_REGULATION_OF_PEPTIDYL_TYROSINE_PHOSPHORYLATION	114	42	7.06834e-05	0.00226866	HAX1:IL6R:SHC1:ARHGEF2:PTPRC:CD81:CD44:CBL:TNFRSF1A:GAS6:EHD4:LRRK1:SOCS1:MVP:ARL2BP:ARRB2:UNC119:STAT3:SOCS3:SAMSN1:APP:ITGB2:PRKCD:HCLS1:PARP9:PARP14:RAP2B:IL6ST:CD74:DUSP22:NEDD9:VEGFA:IBTK:FYN:PDGFA:CAV1:PTK2B:HSF1:JAK2:SEMA4D:SYK:ABL1
GO_LEUKOCYTE_ACTIVATION_INVOLVED_IN_INFLAMMATORY_RESPONSE	14	10	7.19502e-05	0.00229928	C1QA:JUN:PTPRC:ATM:LDLR:TYROBP:APP:ITGB2:AIF1:NAMPT
GO_HUMORAL_IMMUNE_RESPONSE	63	27	7.3502e-05	0.0023387	PLA2G2A:C1QA:C1QC:C1QB:S100A12:PTPRC:BLNK:CD81:C1S:C3AR1:IGHM:CCL2:CFD:BST2:GPI:POU2F2:BCL3:SLC11A1:RBPJ:MEF2C:HLA-E:TNFRSF21:SCARA3:NOTCH1:TFE3:VSIG4:RPL39
GO_BIOMINERAL_TISSUE_DEVELOPMENT	73	30	7.69992e-05	0.00243941	ISG15:CYR61:SRGN:MGP:ANO6:FOXO1:GAS6:HIF1A:SMAD3:FAM101B:COL1A1:ROCK1:SBNO2:ITGB1BP1:ROCK2:SLC8A1:ACVR2A:BMPR2:BMP2:PPARA:CCR1:BMP2K:SPP1:ANKH:MEF2C:ENPP1:COL1A2:PTK2B:NOTCH1:BCOR
GO_HOMEOSTASIS_OF_NUMBER_OF_CELLS	147	51	7.88757e-05	0.00248814	ISG15:UBAP2L:FCER1G:AMPD3:ETS1:KRAS:NCKAP1L:HMGB1:RB1:TNFSF13B:HIF1A:ZFP36L1:KLF13:B2M:TMOD3:IREB2:CYLD:LGALS9:STAT3:NFE2L1:DNASE2:KLF2:GPI:ZFP36:AXL:BAX:ID2:MERTK:ACVR2A:INPP5D:MAFB:HMOX1:RBFOX2:HCLS1:ADD1:HMGB2:MEF2C:CD74:MAPK14:VEGFA:TNFAIP3:CDK6:NAPEPLD:KMT2E:HIPK2:EZH2:JAK2:PTBP3:ABL1:NOTCH1:TSC22D3
GO_POSITIVE_REGULATION_OF_INTERLEUKIN_1_PRODUCTION	19	12	8.26556e-05	0.00259623	IFI16:CASP1:HMGB1:SMAD3:LGALS9:TYROBP:CARD8:APP:WNT5A:EGR1:JAK2:TLR4
GO_REGULATION_OF_TRANS_SYNAPTIC_SIGNALING	151	52	8.40856e-05	0.00262991	DVL1:TPRG1L:RAP1A:EGLN1:ITGB1:SRGN:EIF4EBP2:MTMR2:KRAS:RAP1B:SSH1:NFATC4:EIF2AK4:SLC24A1:NPTN:MCTP2:PRKCB:STX4:CDH11:ARRB2:CCL2:RARA:STAT3:SH3GL1:S1PR2:PRKACA:HOMER3:TYROBP:CALM3:PREPL:CREB1:PNKD:PTPRA:ZMYND8:APP:MAPK1:YWHAH:GNAI2:PXK:MME:PPP3CA:HOMER1:MEF2C:EDN1:FLOT1:FYN:PPP1R9A:PTK2B:RNF19A:JAK2:ABL1:CASK
GO_INTERLEUKIN_6_PRODUCTION	57	25	8.54321e-05	0.0026607	PTAFR:IL6R:ARHGEF2:FCER1G:MAPKAPK2:CAPN2:NCKAP1L:HMGB1:GAS6:ARRB2:LGALS9:STAT3:KLF2:TYROBP:INPP5D:SIRPA:MAVS:APP:MYD88:WNT5A:ZBTB20:AIF1:TNFAIP3:DDX58:TLR4
GO_CELLULAR_RESPONSE_TO_DRUG	181	60	8.69988e-05	0.00269806	GNB1:PTAFR:RAP1A:ADAM15:ARHGEF2:MTR:VIM:DDIT4:BNIP3:RELA:FOLR2:KMT2A:ETS1:ITPR2:HNRNPA1:STAT6:CDK4:RAP1B:SSH1:FOXO1:GAS6:MAPK3:MT2A:KDM6B:NME1:KLF2:AXL:ROCK2:NCOA1:CYP1B1:SLC8A1:RNF149:CFLAR:ANKZF1:STK25:SIRPA:MAPK1:HMOX1:GNAI2:PRKCD:QDPR:SLIT2:PPP3CA:MEF2C:EGR1:NR3C1:RIPK1:EDN1:AIF1:FYN:MAP3K5:TNFAIP3:ACTB:EZH2:FBXO32:MYC:HSF1:ABL1:SETX:CYBB
GO_CARTILAGE_DEVELOPMENT	87	34	8.86598e-05	0.00272657	CYR61:THBS3:CD44:RELA:SERPINH1:MGP:LUM:HIF1A:SMAD3:PKD1:MAPK3:MAF:FAM101B:RARA:COL1A1:KIAA1715:BMPR2:COL6A3:BMP2:COL6A1:COL6A2:TGFBR2:COL7A1:WNT5A:MEF2C:TGFBI:EDN1:MAPK14:CTGF:LOXL2:SCARA3:MATN2:COL27A1:TIMP1
GO_PRODUCTION_OF_MOLECULAR_MEDIATOR_OF_IMMUNE_RESPONSE	87	34	8.86598e-05	0.00272657	TNFRSF1B:FCER1G:MR1:PTPRC:CUEDC2:STAT6:UNG:TNFSF13B:GAS6:B2M:IL4R:MAPK3:STX4:EXOSC6:MALT1:TCF3:BST2:GPI:POU2F2:MSH2:SLC11A1:MAVS:SAMHD1:HMOX1:WNT5A:RNF168:WHSC1:CD74:HLA-E:MAPK14:POLM:NBN:DDX58:TLR4
GO_RESPONSE_TO_ACID_CHEMICAL	170	57	9.12007e-05	0.00279302	GNB1:MTHFR:PTAFR:LAMTOR5:ABL2:ATP2B4:CAPN2:TOMM20:SCD:CAT:RELA:CPT1A:FOLR2:YAP1:ATM:CD9:PHB2:CDK4:FOXO1:COL4A1:NFATC4:IREB2:SOCS1:RARA:COL1A1:NME1:PIK3C3:LDLR:KLF2:PPP5C:NCOA1:ATF2:COL3A1:COL5A2:CREB1:COL6A1:TWF2:WNT5A:PDGFRA:IGFBP7:ACSL1:EGR1:LARS:SPARC:EDN1:UBR2:PTK7:VEGFA:FYN:CTGF:COL1A2:WNT2:PTK2B:HSF1:ALAD:SETX:CYBB
GO_RECEPTOR_SIGNALING_PATHWAY_VIA_STAT	67	28	9.31755e-05	0.00282342	IL6R:PTPRC:TNFRSF1A:STAT2:PIAS1:PKD1:SOCS1:ARL2BP:CCL2:STAT3:SOCS3:BCL3:CYP1B1:NMI:IFNAR2:AP000295,9:IL10RB:IFNAR1:HCLS1:PARP9:PARP14:IL6ST:FER:FYN:CAV1:PTK2B:HSF1:JAK2:NOTCH1
GO_CALCIUM_MEDIATED_SIGNALING	77	31	9.34605e-05	0.00282342	CAMTA1:GBP1:VCAM1:ATP1B1:PTPRC:ATP2B4:NUDT4:CMKLR1:CAMKK2:NFATC4:MCTP2:PRKACA:HOMER3:CALM3:SLC8A1:CALM2:PLEK:CXCR4:FKBP1A:NFATC2:RCAN1:ITPR1:LMCD1:CCR1:PPP3CA:PDE4D:EDN1:PPP1R9A:PTK2B:SYK:DMD
GO_RAS_PROTEIN_SIGNAL_TRANSDUCTION	247	77	9.85919e-05	0.00295776	GNB1:PHACTR4:JUN:ARHGAP29:RAP1A:RHOC:SHC1:ARHGEF2:ABL2:RAB7L1:RHOU:ITGB1:DNMBP:SHOC2:KIAA1598:ARHGAP1:RAB6A:CBL:EPS8:KRAS:RAP1B:MAPKAPK5:RB1:LPAR6:SPRY2:FARP1:RAB27A:RAB8B:KSR1:GNA13:GRB2:CYTH1:RAB12:RAB31:ROCK1:MAPRE2:KANK2:MYO9B:RRAS:NUP62:ROCK2:ITSN2:RAB10:CDC42EP3:RHOQ:MAP4K4:RND3:COL3A1:PREX1:RAB22A:TIAM1:ITSN1:RAC2:CYTH4:CDC42EP1:RABL2B:ARHGEF3:HEG1:RAP2B:TRIO:CDC42SE2:G3BP1:RREB1:FLOT1:AIF…
GO_SECOND_MESSENGER_MEDIATED_SIGNALING	130	46	0.000101939	0.00304575	GNB1:CAMTA1:GBP1:VCAM1:ATP1B1:RGS2:PTPRC:ATP2B4:EIF4EBP2:INPP5A:ITPR2:NUDT4:CMKLR1:PEBP1:CAMKK2:NFATC4:THBS1:MCTP2:KSR1:GNA13:PRKACA:HOMER3:CALM3:FPR1:SLC8A1:CALM2:PLEK:CXCR4:DGKD:FKBP1A:NFATC2:RCAN1:ITPR1:LMCD1:CCR1:PRKAR2A:GNAI2:PPP3CA:PDE4D:EDN1:DDAH2:VEGFA:PPP1R9A:PTK2B:SYK:DMD
GO_REGULATION_OF_VASCULATURE_DEVELOPMENT	171	57	0.000109319	0.00325301	EPHA2:AGO1:JAK1:F3:RAP1A:HIPK1:IL6R:EGLN1:ITGB1:CREB3L1:ETS1:FOXJ2:C3AR1:HDAC7:DCN:SPRY2:EFNB2:COL4A2:HIF1A:WARS:SPRED1:THBS1:PML:PRKCB:EPN2:STAT3:MAP3K3:ROCK1:KLF2:PAK4:RRAS:ITGB1BP1:ROCK2:CYP1B1:ATF2:CFLAR:SP100:NFATC2:ITGB2:HMOX1:TGFBR2:STAB1:WNT5A:PLXND1:EGR1:SPARC:FOXC1:VEGFA:TNFAIP3:SOD2:HIPK2:PTK2B:MTDH:RECK:ABL1:NOTCH1:CYBB
GO_REGULATION_OF_CELL_PROJECTION_ASSEMBLY	95	36	0.00011759	0.00347679	EPHA2:TACSTD2:ODF2L:FNBP1L:ARAP1:EPS8:SSH1:EVL:CCP110:CYLD:ATMIN:PFN1:SSH2:PLEKHM1:SEPT9:CDC42EP3:RHOQ:CCDC88A:ZMYND8:RAC2:CDC42EP1:MAP4:TWF2:PRKCD:SLIT2:CEP135:MYO10:FER:APC:FSCN1:RAC1:SEPT7:RALA:PPP1R9A:CAV1:WAS
GO_POSITIVE_REGULATION_OF_MAP_KINASE_ACTIVITY	138	48	0.000117952	0.00347679	GADD45A:S100A12:SHC1:PTPRC:MAPKAPK2:DUSP5:ADAM8:CD81:ILK:KRAS:DUSP6:MAPKAPK5:MAP4K5:THBS1:MAP2K1:TRAF7:MAPK3:SPAG9:MAP3K3:GADD45B:S1PR2:FPR1:EIF2AK2:CXCR4:ZEB2:MLTK:BMP2:TIAM1:MAPK1:WNT5A:ITGA1:MAP3K1:CD74:RIPK1:EDN1:MAPK14:VEGFA:MAP3K5:RP1-111D6,3:TAB2:PDGFA:MDFIC:EZH2:PTK2B:ADAM9:JAK2:SYK:TLR4:IRAK1
GO_DEFENSE_RESPONSE_TO_BACTERIUM	58	25	0.00012049	0.00351429	ISG15:EPHA2:PLA2G2A:S100A12:IL6R:SHC1:FCER1G:MR1:OPTN:TNFRSF1A:IGHM:BCL3:SLC11A1:MAVS:ADAMTS5:MYD88:STAB1:PRKCD:FOXP1:RBPJ:HMGB2:HLA-E:SYK:TLR4:RPL39
GO_MUSCLE_ADAPTATION	58	25	0.00012049	0.00351429	TNFRSF1B:RGS2:ATP2B4:TNFRSF1A:FOXO1:SMAD3:IREB2:MEF2A:ROCK1:CTDP1:ROCK2:CFLAR:HMOX1:PPARA:LMCD1:PPP3CA:IL6ST:MEF2C:EDN1:JARID2:AIF1:UTRN:EZH2:FBXO32:NOTCH1
GO_RESPONSE_TO_CORTICOSTEROID	78	31	0.000124285	0.00361064	PTAFR:HNRNPU-AS1:HNRNPU:DDIT4:MDK:CCND1:KRAS:ATP2B1:PEBP1:FOXO1:ZFP36L1:FOS:COL1A1:ZFP36:FOSB:CALM3:ZFP36L2:HNMT:CFLAR:GLB1:SLIT2:IGFBP7:NR3C1:SPARC:EDN1:AIF1:CTGF:ADAM9:FBXO32:ALAD:NOTCH1:CYBB
GO_SMALL_GTPASE_MEDIATED_SIGNAL_TRANSDUCTION	312	93	0.000125938	0.00364428	GNB1:PHACTR4:JUN:ARHGAP29:RAP1A:RHOC:SHC1:ARHGEF2:ARHGAP30:ABL2:RGL1:RAB7L1:RHOU:ARHGAP21:ARHGAP12:ITGB1:DNMBP:ARL3:SHOC2:KIAA1598:ARFIP2:ARHGAP1:ARAP1:RAB6A:CBL:EPS8:KRAS:SRGAP1:RAP1B:MAPKAPK5:RB1:LPAR6:SPRY2:FARP1:RAB27A:CGNL1:RAB8B:KSR1:GNA13:GRB2:CYTH1:RAB12:RAB31:ROCK1:MAPRE2:SH2D3A:KANK2:MYO9B:RRAS:NUP62:ROCK2:ITSN2:RAB10:CDC42EP3:RHOQ:MAP4K4:RND3:COL3A1:PREX1:RAB22A:TIAM1:ITSN1:HMOX1:RAC2:…
GO_CELLULAR_RESPONSE_TO_LIPID	297	89	0.000142731	0.00411402	GNB1:TNFRSF1B:PTAFR:ADAM15:ABL2:CAPN2:HNRNPU-AS1:HNRNPU:VIM:DDIT4:SIGIRR:CRY2:RELA:CPT1A:YAP1:CASP1:ATM:PHB2:NR4A1:CALCOCO1:CDK4:ATP2B1:NCOR2:HMGB1:FOXO1:RB1:NFATC4:NFKBIA:ZFP36L1:PIAS1:IREB2:ABHD2:MAPK3:ARRB2:CD68:PER1:CCL2:RARA:NFE2L1:COL1A1:NME1:DDX5:MALT1:SBNO2:LDLR:KANK2:ZFP36:AXL:CARD8:ROCK2:NCOA1:LBH:ZFP36L2:DDX18:CFLAR:CREB1:SIRPA:HCK:MAPK1:YWHAH:RBFOX2:TSPO:PPARA:THRB:TWF2:WNT5A:FOXP1:SP…
GO_VIRAL_GENOME_REPLICATION	82	32	0.000146141	0.00419586	ISG15:PPIE:NFIA:PKN2:LAMTOR5:ADAR:IFI16:RAB7L1:IFITM2:IFITM3:FAM111A:ATG16L2:KIAA1551:MPHOSPH8:GAS6:IFI27:EIF2AK4:CCL2:DDX5:RAD23A:BST2:ROCK2:EIF2AK2:ATG16L1:MAVS:UBP1:FAM208A:PLSCR1:TNIP1:ZC3HAV1:PABPC1:NOTCH1
GO_FC_RECEPTOR_MEDIATED_STIMULATORY_SIGNALING_PATHWAY	62	26	0.000153517	0.00439047	RAP1A:FCER1G:FCGR2A:FCGR3A:PTPRC:NCKAP1L:MAPK3:GRB2:ACTR2:WIPF1:HCK:MAPK1:PRKCD:APPL1:PLSCR1:PIK3CA:MYO10:PIK3R1:CYFIP2:FYN:ACTB:RAC1:ARPC1B:SYK:ABL1:WAS
GO_REGULATION_OF_PROTEIN_DEPOLYMERIZATION	43	20	0.000162489	0.00462904	CAPZA1:ARHGEF2:ADD3:EPS8:CFL2:TMOD3:SPTBN1:PLEK:CAPG:CLASP1:TWF2:ADD1:WDR1:MAP1B:APC:LRRC16A:CAPZA2:ASPH:SPTAN1:CAMSAP1
GO_INTERLEUKIN_1_SECRETION	20	12	0.000167124	0.0047427	S100A13:CASP1:HMGB1:GAS6:PML:LGALS9:CARD8:IL1R2:WNT5A:FOXP1:TNFAIP3:TLR4
GO_REGULATION_OF_NERVOUS_SYSTEM_DEVELOPMENT	408	116	0.000173976	0.00491817	DVL1:SKI:TNFRSF1B:C1QA:MACF1:MYCL:LEPRE1:PRKACB:RAP1A:ARHGEF2:PBX1:ABL2:RGS2:RAB7L1:PLXNA2:VIM:KIAA1598:ILK:DENND5A:RELA:MTMR2:YAP1:DIXDC1:ZNF259:SORL1:BHLHE41:LRP1:LLPH:NAP1L1:PLXNC1:SSH1:EFNB2:NFATC4:HIF1A:NUMB:EIF2AK4:B2M:MAP2K1:NPTN:HMG20A:EEF2K:ZFHX3:PMP22:SSH2:RARA:STAT3:SPAG9:NME1:CSNK1D:ROCK1:STK11:TCF3:LDLR:PRKACA:ID2:ITSN2:NCOA1:CCDC88A:ACTR2:MAP4K4:TTL:CXCR4:ZEB2:COL3A1:CFLAR:BMPR2:CRE…
GO_IMMUNE_RESPONSE_REGULATING_CELL_SURFACE_RECEPTOR_SIGNALING_PATHWAY	216	68	0.00017946	0.00505376	JUN:PRKACB:GBP1:RAP1A:SHC1:MNDA:FCER1G:FCGR2A:FCGR3A:PTPRC:RAB7L1:RELA:C3AR1:KRAS:NCKAP1L:CMKLR1:LGALS3:FOS:IGHM:PRKCB:MAPK3:CYLD:CMTM3:GRB2:MALT1:STK11:PRKACA:BAX:FPR1:PSME4:ACTR2:WIPF1:SLC39A10:INPP5D:HCK:NFATC2:MAPK1:PRKCD:APPL1:FOXP1:NFKBIZ:PLSCR1:PIK3CA:PPP3CA:MYO10:FYB:MAP3K1:PDE4D:PIK3R1:MEF2C:FER:CYFIP2:LCP2:DUSP22:HLA-DRA:HLA-DRB1:HLA-DPA1:HLA-DPB1:TNFRSF21:FYN:RP1-111D6,3:TAB2:ACTB:RAC1…
GO_REGULATION_OF_TRANSFERASE_ACTIVITY	530	145	0.000204169	0.00572536	DVL1:GADD45A:PRKACB:CYR61:RAP1A:S100A12:IL6R:ADAR:SHC1:RGS2:PTPRC:ATP2B4:DSTYK:MAPKAPK2:PPP2R5A:HNRNPU-AS1:HNRNPU:CCNY:DUSP5:ADAM8:CD81:CDKN1C:ILK:CCND1:MRE11A:CBL:SORL1:CCND2:KRAS:NCKAP1L:CDK4:OSBPL8:DUSP6:MAPKAPK5:GCN1L1:CAMKK2:RB1:SPRY2:GAS6:MAP4K5:C14orf166:WARS:SPRED1:THBS1:MAP2K1:FEM1B:IGF1R:PKD1:TRAF7:SOCS1:DCUN1D3:MVP:MAPK3:RBL2:SMG6:SMCR8:KSR1:UNC119:SPAG9:MAP3K3:SOCS3:MALT1:STK11:GADD45…
GO_POSITIVE_REGULATION_OF_CELL_JUNCTION_ASSEMBLY	23	13	0.000204867	0.00572536	EPHA2:S100A10:SMAD3:ROCK1:ITGB1BP1:MAP4K4:LIMS1:SDC4:FLOT1:VEGFA:RAC1:CAV1:ABL1
GO_RHO_PROTEIN_SIGNAL_TRANSDUCTION	108	39	0.000206572	0.00575115	PHACTR4:ARHGAP29:RHOC:ARHGEF2:ABL2:RHOU:ITGB1:DNMBP:KIAA1598:ARHGAP1:EPS8:LPAR6:FARP1:GNA13:ROCK1:KANK2:MYO9B:ROCK2:ITSN2:CDC42EP3:RHOQ:RND3:COL3A1:PREX1:TIAM1:ITSN1:RAC2:CDC42EP1:ARHGEF3:HEG1:TRIO:CDC42SE2:FLOT1:GNA12:RAC1:COL1A2:ABL1:WAS:ARHGEF6
GO_REGULATION_OF_RESPONSE_TO_CYTOKINE_STIMULUS	101	37	0.000213475	0.00591801	JAK1:HIPK1:PTPRC:SIGIRR:BIRC2:CASP1:TNFRSF1A:GAS6:HIF1A:PIAS1:SOCS1:CYLD:RFFL:SOCS3:AXL:CARD8:PXDN:VRK2:IL1R2:MAVS:SAMHD1:IFNAR2:AP000295,9:IFNGR2:WNT5A:PARP9:PARP14:SLIT2:CD74:RIPK1:EDN1:TNFAIP3:CAV1:JAK2:DDX58:SYK:TLR4:IRAK1
GO_NEURON_APOPTOTIC_PROCESS	119	42	0.000214176	0.00591801	JUN:MCL1:BNIP3:ADAM8:ILK:MDK:ATM:ZNF259:KRAS:LRP1:KDM2B:RB1:NFATC4:HIF1A:MAX:ARRB2:CCL2:ROCK1:GPI:TYROBP:AXL:BAX:AKT1S1:MSH2:ATF2:LANCL1:CTSZ:APP:ITSN1:HMOX1:THRB:PIK3CA:FAM134B:ITGA1:MEF2C:TNFRSF21:FYN:SOD2:HIPK2:PTK2B:JAK2:NONO
GO_REGULATION_OF_LEUKOCYTE_MEDIATED_IMMUNITY	87	33	0.000218314	0.00600975	TNFRSF1B:PTAFR:CD84:FCER1G:PTPRC:STAT6:UNG:HMGB1:B2M:IL4R:STX4:EXOSC6:ARRB2:LGALS9:MALT1:BST2:PVR:MSH2:MAVS:ITGB2:HMOX1:RAC2:WHSC1:FER:DUSP22:HLA-A:HLA-E:HLA-B:FAM49B:DDX58:SYK:TLR4:WAS
GO_REGULATION_OF_DNA_BINDING_TRANSCRIPTION_FACTOR_ACTIVITY	237	73	0.000223707	0.00613524	CTNNBIP1:JUN:S100A12:ARHGEF2:EGLN1:NFKB2:ADAM8:SIGIRR:CAT:RPS6KA4:RELA:PHB2:KRAS:RNF41:CMKLR1:RB1:GAS6:NFKBIA:FOS:EIF2AK4:SMAD3:PKD1:PRKCB:MAPK3:CYLD:ARRB2:LGALS9:STAT3:MALT1:TCF3:ZNF431:CARD8:ID2:EIF2AK2:CYP1B1:ATF2:CFLAR:SP100:LRRFIP1:MAVS:HCK:APP:ITGB2:MAPK1:HMOX1:MYD88:WNT5A:HCLS1:PPP3CA:DAP:FER:RIPK1:EDN1:FLOT1:MAPK14:VEGFA:SGK1:TNFAIP3:RP1-111D6,3:TAB2:CAV1:WNT2:HIPK2:EZH2:SGK3:MTDH:TRIB1:J…
GO_REGULATION_OF_MACROPHAGE_ACTIVATION	26	14	0.000232634	0.00635289	C1QA:PTPRC:ATM:THBS1:IL4R:LDLR:IL1RL1:APP:ITGB2:WNT5A:PJA2:CD74:TLR4:VSIG4
GO_REGULATION_OF_MAP_KINASE_ACTIVITY	183	59	0.000233371	0.00635289	GADD45A:S100A12:SHC1:RGS2:PTPRC:MAPKAPK2:DUSP5:ADAM8:CD81:ILK:SORL1:KRAS:DUSP6:MAPKAPK5:SPRY2:MAP4K5:SPRED1:THBS1:MAP2K1:IGF1R:TRAF7:MAPK3:KSR1:SPAG9:MAP3K3:GADD45B:S1PR2:NUP62:FPR1:EIF2AK2:CXCR4:ZEB2:MLTK:BMP2:TIAM1:MAPK1:PRKCD:WNT5A:ITGA1:MAP3K1:CD74:DUSP22:RIPK1:EDN1:MAPK14:VEGFA:MAP3K5:RP1-111D6,3:TAB2:PDGFA:MDFIC:CAV1:EZH2:PTK2B:ADAM9:TRIB1:JAK2:SYK:TLR4:IRAK1
GO_MUSCLE_CELL_DIFFERENTIATION	149	50	0.000235626	0.00639059	SKI:PLEKHO1:RGS2:CAPN2:HNRNPU-AS1:HNRNPU:ITGB1:MYOF:KRAS:BHLHE41:RB1:EFNB2:NFATC4:CFL2:TMOD3:PIAS1:MEF2A:MYH11:IL4R:ARRB2:KDM6B:RARA:SPAG9:CTDP1:TCF3:SLC8A1:CFLAR:BMP2:NFATC2:MYH9:PPARA:WDR1:RBPJ:PDGFRA:PPP3CA:SORBS2:HOMER1:MEF2C:MAML1:EDN1:FLOT1:MAPK14:VEGFA:SYNE1:SOD2:CAV2:EZH2:ABL1:NOTCH1:DMD:MORF4L2
GO_HEART_GROWTH	44	20	0.000239566	0.00644985	RGS2:YAP1:DUSP6:CTDP1:MAPK1:PPARA:TGFBR2:HEG1:C3orf58:RBPJ:SORBS2:BASP1:MEF2C:FOXC1:RIPK1:EDN1:JARID2:MAPK14:WNT2:NOTCH1
GO_POSITIVE_REGULATION_OF_PRODUCTION_OF_MOLECULAR_MEDIATOR_OF_IMMUNE_RESPONSE	44	20	0.000239566	0.00644985	FCER1G:PTPRC:STAT6:UNG:B2M:IL4R:MAPK3:STX4:EXOSC6:MALT1:GPI:MSH2:MAVS:WNT5A:WHSC1:CD74:HLA-E:MAPK14:DDX58:TLR4
GO_TISSUE_REMODELING	77	30	0.000241131	0.00646829	EPHA2:LEPR:ADAM8:HMGB1:HIF1A:LRRK1:LEPREL4:PLEKHM1:ROCK1:AXL:BAX:ROCK2:MERTK:BMPR2:INPP5D:CST3:RAC2:RBPJ:SPP1:PPP3CA:MEF2C:FOXC1:GJA1:TNFAIP3:RAC1:CAV1:PTK2B:CTHRC1:SYK:TIMP1
GO_MUSCLE_CELL_PROLIFERATION	98	36	0.000242794	0.00648923	CTNNBIP1:PTAFR:JUN:IL6R:ILK:YAP1:FOXJ2:THBS1:STAT3:ID2:CFLAR:ADAMTS1:MAPK1:HMOX1:TGFBR2:GNAI2:FOXP1:C3orf58:RBPJ:MEF2C:FOXC1:RIPK1:EDN1:JARID2:AIF1:MAPK14:MAP3K5:TNFAIP3:SOD2:IGFBP3:NAMPT:WNT2:TRIB1:JAK2:NOTCH1:IRAK1
GO_REGULATION_OF_TRANSPORT	805	209	0.0002443	0.00650581	DVL1:TNFRSF1B:PTAFR:LEPRE1:SH3GLB1:GBP1:RAP1A:CD58:CTSS:HAX1:CD84:FCER1G:ATP1B1:ABL2:RGS2:PTPRC:ATP2B4:RAB7L1:PTPN14:TP53BP2:RHOU:SRGN:ADAM8:CD151:SVIP:CRY2:ARHGAP1:AHNAK:ARL2:CPT1A:NUMA1:LRRC32:SYTL2:MTMR2:CASP1:ZNF259:KMT2A:CBL:SORL1:ADIPOR2:TNFRSF1A:ITPR2:TM7SF3:ANO6:NCKAP1L:LRP1:OS9:RAP1B:OSBPL8:CEP290:HMGB1:EFNB2:TFDP1:GAS6:NFKBIA:LGALS3:HIF1A:NUMB:IFI27:THBS1:EHD4:B2M:RAB27A:RAB8B:OAZ2:MAP2…
GO_RESPONSE_TO_MECHANICAL_STIMULUS	91	34	0.000246888	0.00655099	JUN:GADD45A:BNIP3:RELA:CASP1:ETS1:TNFRSF1A:DCN:NFKBIA:FOS:MEIS2:THBS1:PKD1:MAPK3:PIEZO1:COL1A1:CNN2:JUNB:GPI:FOSB:SLC8A1:COL3A1:TGFBR2:MYD88:MAP3K1:IRF1:EDN1:MAPK14:FYN:SUN1:RAC1:PTK2B:TLR4:DMD
GO_REGULATION_OF_REACTIVE_OXYGEN_SPECIES_BIOSYNTHETIC_PROCESS	41	19	0.000250484	0.00655296	ATP2B4:RAB27A:SMAD3:STAT3:KLF2:ROCK2:CFLAR:SIRPA:ITGB2:TSPO:EDN1:AIF1:DDAH2:FYN:RAC1:CAV1:PTK2B:JAK2:TLR4
GO_NEGATIVE_REGULATION_OF_VIRAL_GENOME_REPLICATION	29	15	0.000250594	0.00655296	ISG15:IFI16:IFITM2:IFITM3:FAM111A:KIAA1551:MPHOSPH8:EIF2AK4:BST2:EIF2AK2:MAVS:FAM208A:PLSCR1:TNIP1:ZC3HAV1
GO_LABYRINTHINE_LAYER_DEVELOPMENT	29	15	0.000250594	0.00655296	CYR61:EGLN1:TMED2:ZFP36L1:MAP2K1:PLCD3:GRB2:SOCS3:JUNB:NCOA1:HS6ST1:MAPK1:RBPJ:WNT2:DNAJB6
GO_EMBRYO_DEVELOPMENT	482	133	0.00025212	0.00655296	DVL1:SKI:MTHFR:EPHA2:ECE1:LUZP1:WDTC1:PHACTR4:SSBP3:SLC35D1:PRKACB:CYR61:HIPK1:PBX1:PLXNA2:CAPN2:EGLN1:KIAA1217:ITGB1:ZMIZ1:RIC8A:CDKN1C:WDR74:YAP1:ZNF259:KMT2A:BHLHE41:MED21:CEP290:KDM2B:TMED2:LPAR6:RNASEH2B:SPRY2:COL4A2:HIF1A:ZFP36L1:FBN1:MAP2K1:SMAD3:PKD1:XYLT1:MAPK3:CMTM3:PFN1:KDM6B:USP22:RARA:PLCD3:COL1A1:GNA13:GRB2:SOCS3:LAMA3:DSC3:JUNB:PRKACA:KLF2:GPI:VASP:BAX:MYADM:ID2:NCOA1:MSH2:TET3:CLA…
GO_GLIAL_CELL_ACTIVATION	18	11	0.00025235	0.00655296	C1QA:JUN:PTPRC:ATM:LRP1:LDLR:TYROBP:APP:ITGB2:AIF1:NAMPT
GO_REGULATION_OF_ACTIN_FILAMENT_BUNDLE_ASSEMBLY	57	24	0.000253203	0.00655296	TACSTD2:RHOC:S100A10:ARAP1:PXN:EVL:SMAD3:FHOD1:PFN1:ROCK1:ITGB1BP1:ROCK2:PLEK:CLASP1:SDC4:SYNPO2:PIK3R1:LRRC16A:CTGF:RAC1:PPP1R9A:ABL1:WAS:FLNA
GO_RESPONSE_TO_ORGANOPHOSPHORUS	57	24	0.000253203	0.00655296	PTAFR:JUN:RAP1A:SELL:LDHA:RELA:BIRC2:ITPR2:RAP1B:SSH1:PEBP1:ZFP36L1:FOS:EEF2K:PER1:COL1A1:NME1:JUNB:FOSB:SLC8A1:PNPT1:APP:SPARC:PTK2B
GO_RESPONSE_TO_TRANSFORMING_GROWTH_FACTOR_BETA	142	48	0.000256796	0.00662263	SKI:JUN:CDKN1C:FAM89B:LRRC32:CBL:PXN:COL4A2:FERMT2:ZFP36L1:LTBP2:FOS:THBS1:FBN1:SMAD3:PML:VASN:ZFHX3:ARRB2:COL1A1:SMURF2:ROCK1:STK11:ROCK2:ZFP36L2:LIMS1:ACVR2A:COL3A1:CFLAR:BMPR2:CREB1:FERMT1:TGFBR2:WNT5A:APPL1:MEF2C:NR3C1:DUSP22:EDN1:FYN:CITED2:COL1A2:CAV2:CAV1:WNT2:HIPK2:ZYX:ADAM9
GO_REGULATION_OF_HEART_GROWTH	32	16	0.000259867	0.00666186	RGS2:YAP1:DUSP6:CTDP1:MAPK1:PPARA:TGFBR2:RBPJ:BASP1:MEF2C:RIPK1:EDN1:JARID2:MAPK14:WNT2:NOTCH1
GO_POSITIVE_REGULATION_OF_RECEPTOR_SIGNALING_PATHWAY_VIA_STAT	35	17	0.000261942	0.00666186	IL6R:TNFRSF1A:SOCS1:ARL2BP:STAT3:SOCS3:CYP1B1:IL10RB:HCLS1:PARP9:PARP14:IL6ST:FYN:PTK2B:HSF1:JAK2:NOTCH1
GO_MYOTUBE_DIFFERENTIATION	35	17	0.000261942	0.00666186	SKI:PLEKHO1:CAPN2:MYOF:BHLHE41:IL4R:CFLAR:NFATC2:MYH9:PPP3CA:HOMER1:MEF2C:MAML1:FLOT1:MAPK14:CAV2:NOTCH1
GO_REGULATION_OF_ERYTHROCYTE_DIFFERENTIATION	35	17	0.000261942	0.00666186	ISG15:ETS1:NCKAP1L:HIF1A:ZFP36L1:KLF13:B2M:STAT3:ZFP36:ID2:ACVR2A:INPP5D:MAFB:RBFOX2:HMGB2:MAPK14:CDK6
GO_POSITIVE_REGULATION_OF_CELL_PROJECTION_ORGANIZATION	203	64	0.000262913	0.00666349	DVL1:MACF1:LEPRE1:FNBP1L:RAP1A:ABL2:RGS2:PLXNA2:KIAA1598:ILK:ARAP1:EPS8:LRP1:LLPH:PLXNC1:RAB8B:MAP2K1:NPTN:CCP110:EEF2K:ATMIN:PFN1:PLEKHM1:NME1:SEPT9:STK11:ITSN2:CDC42EP3:RHOQ:CCDC88A:ACTR2:ZEB2:CFLAR:BMPR2:STK25:ZMYND8:TIAM1:RAC2:CDC42EP1:PLXNB2:SS18L2:TWF2:WNT5A:PLXND1:SLIT2:CEP135:RUFY3:MAP1B:APC:RREB1:LRRC16A:PTK7:VEGFA:FYN:FSCN1:RAC1:SEPT7:RALA:PPP1R9A:EZH2:PTK2B:VLDLR:SEMA4D:SETX
GO_SYNAPTIC_SIGNALING	207	65	0.000267869	0.00676575	DVL1:TPRG1L:KIF1B:RAP1A:EGLN1:ITGB1:SRGN:EIF4EBP2:RELA:FCHSD2:MTMR2:KRAS:RAP1B:SSH1:NFATC4:ATXN3:SLC12A6:EIF2AK4:BLOC1S6:SLC24A1:NPTN:MCTP2:PRKCB:STX4:CDH11:ARRB2:PMP22:UNC119:CCL2:RARA:STAT3:PIP5K1C:SH3GL1:S1PR2:PRKACA:HOMER3:TYROBP:CALM3:PREPL:GLS:CREB1:PNKD:PTPRA:ZMYND8:APP:MAPK1:YWHAH:GNAI2:PXK:MME:PPP3CA:HOMER1:MEF2C:FCHSD1:EDN1:FLOT1:SLC29A1:FYN:PPP1R9A:EXOC4:PTK2B:RNF19A:JAK2:ABL1:CASK
GO_POSITIVE_REGULATION_OF_IMMUNE_EFFECTOR_PROCESS	95	35	0.000276048	0.00693375	PTAFR:RAP1A:CD84:FCER1G:PTPRC:STAT6:UNG:B2M:IL4R:MAPK3:STX4:EXOSC6:LGALS9:RARA:MALT1:GPI:PVR:MSH2:MAVS:ITGB2:HMOX1:RAC2:WNT5A:NFKBIZ:WHSC1:FER:CD74:HLA-A:HLA-E:HLA-B:MAPK14:FAM49B:DDX58:SYK:TLR4
GO_REGULATION_OF_ACTOMYOSIN_STRUCTURE_ORGANIZATION	54	23	0.000276406	0.00693375	TACSTD2:RHOC:S100A10:ARAP1:PXN:EVL:SMAD3:FHOD1:PFN1:ROCK1:ITGB1BP1:ROCK2:CLASP1:SDC4:PIK3R1:MEF2C:EDN1:LRRC16A:CTGF:RAC1:PPP1R9A:ABL1:WAS
GO_AMEBOIDAL_TYPE_CELL_MIGRATION	227	70	0.000287946	0.00719866	EPHA2:PHACTR4:MACF1:TACSTD2:JUN:PKN2:ITGB1:RIC8A:ILK:PRCP:ETS1:HDAC7:NR4A1:DCN:PXN:HMGB1:EFNB2:HIF1A:EVL:SPRED1:THBS1:PML:PFN1:RFFL:MAP3K3:SMURF2:MAPRE2:KANK2:GPI:ITGB1BP1:ROCK2:CYP1B1:SLC8A1:MAP4K4:CLASP1:ZEB2:DPP4:BMPR2:NRP2:TNS1:SP100:FERMT1:SDC4:ITGB2:HMOX1:MYH9:TGFBR2:WNT5A:APPL1:FOXP1:PLXND1:AMOTL2:PIK3CA:SLIT2:MEF2C:FER:SPARC:RREB1:EDN1:VEGFA:GNA12:LOXL2:PTK2B:ADAM9:SEMA4D:ABL1:NOTCH1:PRKX…
GO_CARDIAC_MUSCLE_TISSUE_DEVELOPMENT	106	38	0.000293811	0.00732037	RGS2:EGLN1:HNRNPU-AS1:HNRNPU:ITGB1:YAP1:EFNB2:MEF2A:MYH11:ARRB2:KDM6B:RARA:DSG2:CTDP1:ID2:SLC8A1:CREB1:FKBP1A:BMP2:MAPK1:PPARA:TGFBR2:WNT5A:HEG1:C3orf58:RBPJ:PDGFRA:SORBS2:MEF2C:MAML1:FOXC1:RIPK1:EDN1:JARID2:MAPK14:VEGFA:WNT2:NOTCH1:TAZ
GO_B_CELL_MEDIATED_IMMUNITY	51	22	0.000300139	0.00745277	C1QA:C1QC:C1QB:FCER1G:PTPRC:CD81:C1S:STAT6:UNG:IGHM:IL4R:EXOSC6:POU2F2:BCL3:MSH2:INPP5D:PRKCD:RNF168:WHSC1:CD74:HLA-E:NBN
GO_CELL_SUBSTRATE_JUNCTION_ASSEMBLY	71	28	0.000303448	0.00748438	MACF1:S100A10:LAMC2:COL17A1:CD151:LRP1:FERMT2:ACTN1:THBS1:SMAD3:ROCK1:LAMA3:ITGB1BP1:ROCK2:MAP4K4:LIMS1:CLASP1:ITGA6:TNS1:SDC4:DUSP22:VEGFA:DST:RAC1:PTK2B:PLEC:TLN1:ABL1
GO_NEGATIVE_REGULATION_OF_NEURON_APOPTOTIC_PROCESS	71	28	0.000303448	0.00748438	JUN:ADAM8:ILK:MDK:ZNF259:KRAS:LRP1:KDM2B:NFATC4:HIF1A:ARRB2:CCL2:ROCK1:GPI:AXL:BAX:MSH2:ITSN1:HMOX1:PIK3CA:FAM134B:MEF2C:FYN:SOD2:HIPK2:PTK2B:JAK2:NONO
GO_I_KAPPAB_KINASE_NF_KAPPAB_SIGNALING	158	52	0.000306888	0.00754389	MIER1:RHOC:S100A12:S100A4:S100A13:OPTN:RELA:BIRC2:CASP1:TNFRSF1A:NFKBIA:PRKCB:USP10:PER1:LGALS9:MAP3K3:ROCK1:RIOK3:MALT1:BST2:BCL3:PPP5C:CARD8:NUP62:ROCK2:REL:CFLAR:FKBP1A:SIRPA:MAVS:HMOX1:LGALS1:MYD88:SHISA5:WNT5A:ATP2C1:ALPK1:CD74:TNIP1:RIPK1:SLC35B2:FYN:GJA1:TNFAIP3:RP1-111D6,3:TAB2:MTDH:TLR4:NEK6:ABL1:TSPAN6:IRAK1:FLNA
GO_NEGATIVE_REGULATION_OF_CELL_POPULATION_PROLIFERATION	356	102	0.000313121	0.00766109	SKI:CTNNBIP1:LEPRE1:JUN:S100A11:MNDA:KIFAP3:PTPN14:IFIT3:CDKN1C:ILK:TP53I11:FTH1:LRRC32:ATM:ETS1:CD9:PHB2:RNF41:UTP20:KDM2B:RB1:SPRY2:EFNB2:TFDP1:WARS:PPP2R5C:NDN:KLF13:THBS1:MAP2K1:SMAD3:PML:PMP22:LGALS9:CCL2:RARA:STAT3:NME1:STK11:KANK2:TYROBP:BAX:MED25:NUP62:ID2:ITGB1BP1:KLF11:EIF2AK2:CYP1B1:TMEM127:LIMS2:ATF2:BMPR2:INPP5D:COPS8:FERMT1:BMP2:SDC4:APP:ADAMTS1:HMOX1:TSPO:TGFBR2:WNT5A:MXD4:RBPJ:IGF…
GO_REGULATION_OF_CHEMOTAXIS	92	34	0.00031374	0.00766109	F3:IL6R:C3AR1:ANO6:NCKAP1L:CMKLR1:HMGB1:EFNB2:GAS6:THBS1:SMAD3:MAPK3:STX4:LGALS9:CCL2:CXCR4:BMPR2:TIAM1:RAC2:OXSR1:CCR1:WNT5A:SLIT2:PDGFRA:ZSWIM6:CD74:EDN1:AIF1:MAPK14:VEGFA:RAC1:PTK2B:SEMA4D:NOTCH1
GO_NEUROINFLAMMATORY_RESPONSE	21	12	0.000315508	0.00767876	TNFRSF1B:C1QA:JUN:PTPRC:ATM:LRP1:LDLR:TYROBP:APP:ITGB2:AIF1:NAMPT
GO_CELLULAR_RESPONSE_TO_NITROGEN_COMPOUND	348	100	0.000318926	0.00773633	GNB1:WDTC1:PTAFR:PRKACB:VCAM1:LAMTOR5:RAP1A:SHC1:ARHGEF2:ATP2B4:CAPN2:MTR:VIM:EIF4EBP2:PTPRE:RELA:FOLR2:SIK2:ITPR2:NR4A1:STAT6:LRP1:CDK4:RAP1B:OSBPL8:SSH1:PXN:FOXO1:COL4A1:MAX:ZFP36L1:FBN1:RAB8B:IGF1R:SOCS1:EEF2K:PRKCB:MAPK3:APRT:STAT3:COL1A1:GRB2:SOCS3:RAB31:ROCK1:RIOK3:PRKACA:KLF2:KLF11:ROCK2:RAB10:SLC8A1:RHOQ:ACTR2:COL3A1:COL5A2:CFLAR:CREB1:PTPRA:MAVS:SOGA1:APP:COL6A1:MAPK1:PRKAR2A:GNAI2:PRKCD…
GO_REACTIVE_OXYGEN_SPECIES_BIOSYNTHETIC_PROCESS	48	21	0.000323866	0.00780465	ATP2B4:RAB27A:SMAD3:STAT3:KLF2:ROCK2:CYP1B1:CFLAR:SIRPA:ITGB2:TSPO:EDN1:AIF1:DDAH2:FYN:RAC1:CAV1:PTK2B:JAK2:TLR4:CYBB
GO_POSITIVE_REGULATION_OF_LEUKOCYTE_PROLIFERATION	48	21	0.000323866	0.00780465	VCAM1:IL6R:PTPRC:CD81:NCKAP1L:HMGB1:TNFSF13B:LGALS9:SLC39A10:NFATC2:TGFBR2:IL6ST:MEF2C:CD74:HLA-E:AIF1:HLA-DPA1:HLA-DPB1:SYK:TLR4:EFNB1
GO_POSITIVE_REGULATION_OF_ADAPTIVE_IMMUNE_RESPONSE	45	20	0.000346853	0.00830414	IL6R:FCER1G:PTPRC:STAT6:UNG:TNFSF13B:EIF2AK4:B2M:EXOSC6:MALT1:PVR:MSH2:SLC11A1:NFKBIZ:WHSC1:IL6ST:HLA-A:HLA-E:HLA-B:FAM49B
GO_REGULATION_OF_STRIATED_MUSCLE_CELL_DIFFERENTIATION	45	20	0.000346853	0.00830414	RGS2:CAPN2:BHLHE41:EFNB2:IL4R:ARRB2:CTDP1:CFLAR:BMP2:NFATC2:PPARA:RBPJ:MEF2C:MAML1:EDN1:FLOT1:MAPK14:EZH2:NOTCH1:MORF4L2
GO_NERVOUS_SYSTEM_PROCESS	276	82	0.000349366	0.00833715	DVL1:GNB1:CAMTA1:EYA3:PTAFR:B4GALT2:TACSTD2:JUN:ITGB1:EIF4EBP2:ABLIM1:OAT:RIC8A:NAV2:MDK:MTMR2:KRAS:LUM:SSH1:SPRY2:NFATC4:TIMM9:HIF1A:FOS:NDN:MEIS2:EIF2AK4:SLC24A1:PIAS1:NPTN:NTAN1:MAPK3:ARRB2:UNC119:CCL2:COL1A1:SH3GL1:S1PR2:LDLR:HOMER3:GPI:CIC:ROCK2:CYP1B1:B3GNT2:ACTR2:GPR155:GLS:CREB1:PNKD:ZMYND8:APP:MAPK1:NIPSNAP1:RBFOX2:MGAT3:TYMP:THRB:MME:CCDC50:WDR1:PPP3CA:FAM134B:HOMER1:MEF2C:PJA2:TGFBI:ED…
GO_POSITIVE_REGULATION_OF_PEPTIDYL_TYROSINE_PHOSPHORYLATION	75	29	0.000353971	0.00841971	HAX1:IL6R:ARHGEF2:PTPRC:CD81:CD44:TNFRSF1A:GAS6:EHD4:LRRK1:ARL2BP:ARRB2:UNC119:STAT3:SOCS3:HCLS1:PARP9:PARP14:IL6ST:CD74:NEDD9:VEGFA:FYN:PTK2B:HSF1:JAK2:SEMA4D:SYK:ABL1
GO_POSITIVE_REGULATION_OF_CELL_MORPHOGENESIS_INVOLVED_IN_DIFFERENTIATION	89	33	0.000356433	0.00845092	MACF1:S100A10:PLXNA2:KIAA1598:ILK:LRP1:PLXNC1:MAP2K1:EEF2K:STK11:MYADM:ACTR2:LIMS1:ZEB2:BMPR2:STK25:PREX1:TIAM1:PLXNB2:SS18L2:TWF2:PLXND1:SLIT2:RUFY3:MAP1B:RREB1:NEDD9:LRRC16A:VEGFA:RAC1:SEMA4D:ABL1:FLNA
GO_POSITIVE_REGULATION_OF_INFLAMMATORY_RESPONSE	55	23	0.000381679	0.00902038	PLA2G2A:C1QA:S100A12:FCER1G:ADAM8:ETS1:TNFRSF1A:NFKBIA:LDLR:IL1RL1:APP:ITGB2:IL17RA:MYD88:WNT5A:APPL1:NFKBIZ:IL6ST:TNIP1:HLA-E:NAPEPLD:JAK2:TLR4
GO_REGULATION_OF_B_CELL_PROLIFERATION	27	14	0.000390173	0.00919157	MNDA:PTPRC:CD81:ATM:NCKAP1L:TNFSF13B:TYROBP:SLC39A10:INPP5D:NFATC2:MEF2C:CD74:TNFRSF21:TLR4
GO_POSITIVE_REGULATION_OF_I_KAPPAB_KINASE_NF_KAPPAB_SIGNALING	111	39	0.000394182	0.00925636	MIER1:RHOC:S100A12:S100A4:S100A13:RELA:BIRC2:CASP1:TNFRSF1A:PRKCB:LGALS9:MAP3K3:MALT1:BST2:PPP5C:NUP62:REL:CFLAR:FKBP1A:MAVS:HMOX1:LGALS1:MYD88:SHISA5:ATP2C1:ALPK1:CD74:RIPK1:SLC35B2:FYN:GJA1:RP1-111D6,3:TAB2:MTDH:TLR4:NEK6:ABL1:TSPAN6:IRAK1:FLNA
GO_POSITIVE_REGULATION_OF_CELL_DEVELOPMENT	261	78	0.000396373	0.00927816	DVL1:C1QA:MACF1:LEPRE1:RAP1A:S100A10:ARHGEF2:ABL2:RGS2:PLXNA2:KIAA1598:ILK:RELA:LRP1:LLPH:NAP1L1:PLXNC1:HIF1A:NUMB:MAP2K1:NPTN:EEF2K:RARA:SPAG9:NME1:CSNK1D:STK11:TCF3:S1PR2:TYROBP:MYADM:ID2:ITSN2:NCOA1:ACTR2:LIMS1:CXCR4:ZEB2:CFLAR:BMPR2:STK25:BMP2:ZMYND8:PREX1:APP:TIAM1:CSNK1E:TSPO:PLXNB2:SS18L2:TWF2:WNT5A:PLXND1:MME:ADD1:SLIT2:RUFY3:IL6ST:MAP1B:MEF2C:RREB1:NEDD9:EDN1:LRRC16A:PTK7:VEGFA:FYN:RAC1:…
GO_NEGATIVE_REGULATION_OF_ACTIN_FILAMENT_POLYMERIZATION	30	15	0.000404397	0.00943038	CAPZA1:ADD3:EPS8:TMOD3:PFN1:MYADM:SPTBN1:CAPG:TWF2:PRKCD:ADD1:SLIT2:LRRC16A:CAPZA2:SPTAN1
GO_TUBE_FORMATION	79	30	0.000406141	0.00943038	DVL1:SKI:MTHFR:LUZP1:PHACTR4:PRKACB:SDCCAG8:CEP290:KDM2B:TMED2:HIF1A:PFN1:RARA:PRKACA:VASP:ITGB1BP1:ZEB2:SDC4:PLXNB2:SETD2:WNT5A:NPHP3:SHROOM3:IRX2:PTK7:VEGFA:RALA:CTHRC1:ABL1:NOTCH1
GO_POSITIVE_REGULATION_OF_CELL_MATRIX_ADHESION	33	16	0.000406725	0.00943038	S100A10:ILK:SMAD3:ROCK1:ITGB1BP1:MAP4K4:LIMS1:FERMT1:SDC4:VEGFA:UTRN:RAC1:CDK6:PTK2B:PLEKHA2:ABL1
GO_ANIMAL_ORGAN_MORPHOGENESIS	458	126	0.000417636	0.00965291	DVL1:SKI:CTNNBIP1:EPHA2:PHACTR4:TACSTD2:JUN:CYR61:HIPK1:ADAM15:THBS3:PBX1:EGLN1:ZMIZ1:ACTA2:ABLIM1:ILK:PARVA:RELA:SERPINH1:TSKU:YAP1:PHB2:MGP:KRAS:BHLHE41:STAT6:CEP290:DCN:KDM2B:TMED2:FOXO1:SPRY2:EFNB2:HIF1A:FOXN3:EVL:FBN1:MAP2K1:SMAD3:FEM1B:PML:PKD1:MAPK3:FAM101B:ARRB2:PFN1:CCL2:RARA:STAT3:COL1A1:SMURF2:RFNG:NFIC:BAX:ID2:PSME4:LIMS2:ITGA6:ATF2:COL3A1:COL5A2:CFLAR:BMPR2:NRP2:COL6A3:FKBP1A:BMP2:MA…
GO_POSITIVE_REGULATION_OF_TRANSCRIPTION_BY_RNA_POLYMERASE_II	623	165	0.000424517	0.00978119	SKI:CAMTA1:AGO1:SSBP3:JUN:NFIA:CYR61:DR1:HAX1:ARHGEF2:C1orf85:IFI16:PBX1:DCAF6:SOX13:ELK4:EGLN1:HNRNPU-AS1:HNRNPU:KLF6:ZMIZ1:NFKB2:CD81:TEAD1:CREB3L1:RPS6KA4:RELA:YAP1:ATM:KMT2A:ETS1:TNFRSF1A:FOXJ2:ETV6:MED21:TFCP2:NR4A1:CALCOCO1:STAT6:LUM:DCN:ELK3:GCN1L1:MLXIP:HMGB1:FOXO1:RB1:LMO7:TFDP1:NFATC4:NFKBIA:C14orf166:HIF1A:MAX:FOS:NDN:KLF13:MEIS2:CCPG1:SMAD3:ARID3B:MEF2A:PKD1:MAPK3:FHOD1:ZFHX3:MAF:KDM6…
GO_MUSCLE_TISSUE_DEVELOPMENT	183	58	0.000431282	0.009906	SKI:RGS2:CENPF:EGLN1:HNRNPU-AS1:HNRNPU:SVIL:ITGB1:YAP1:DCN:RB1:EFNB2:CFL2:FOS:SMAD3:MEF2A:MYH11:ARRB2:KDM6B:RARA:DDX5:DSG2:CTDP1:ID2:SLC8A1:COL3A1:CFLAR:CREB1:GPC1:FKBP1A:GPCPD1:BMP2:MAPK1:PPARA:TGFBR2:WNT5A:FLNB:HEG1:C3orf58:RBPJ:PDGFRA:PPP3CA:SORBS2:HOMER1:MEF2C:EGR1:MAML1:FOXC1:RIPK1:EDN1:JARID2:FLOT1:MAPK14:VEGFA:CAV2:CAV1:WNT2:NOTCH1:TAZ
GO_MORPHOGENESIS_OF_AN_EPITHELIUM	278	82	0.000448914	0.010247	DVL1:SKI:CTNNBIP1:MTHFR:EPHA2:LUZP1:PHACTR4:TACSTD2:PRKACB:CYR61:RHOC:PBX1:ARHGAP12:VCL:CD151:ILK:CD44:YAP1:PHB2:KRAS:CEP290:KDM2B:TMED2:SPRY2:EFNB2:COL4A1:NFATC4:HIF1A:SMAD3:FEM1B:PML:PKD1:ARRB2:PFN1:RARA:SMURF2:GNA13:GRB2:SOCS3:PRKACA:VASP:RAB10:PSME4:CLASP1:ZEB2:TRAF3IP1:BMP2:SDC4:CTSZ:TIAM1:PLXNB2:TGFBR2:SETD2:WNT5A:FOXP1:PLXND1:NPHP3:WDR1:SLIT2:RBPJ:SHROOM3:IRX2:C5orf42:MEF2C:RREB1:EDN1:ID4:…
GO_LAMELLIPODIUM_ORGANIZATION	59	24	0.00046968	0.0106878	EPHA2:PLEKHO1:ITGB1:VCL:ABLIM1:ARFIP2:CD44:SSH1:SNX1:C15orf38:SH2B1:SSH2:CCDC88A:RAC2:TWF2:SLIT2:FER:ABLIM3:RREB1:LRRC16A:FSCN1:RAC1:WAS:ARHGEF6
GO_REGULATION_OF_MUSCLE_SYSTEM_PROCESS	94	34	0.000497423	0.0111465	TNFRSF1B:PTAFR:ATP1B1:RGS2:PPP1R12B:ATP2B4:TNFRSF1A:FOXO1:SMAD3:MEF2A:ROCK1:DSG2:CTDP1:PRKACA:CALM3:ROCK2:SLC8A1:CALM2:MYL9:PPARA:LMCD1:PPP3CA:IL6ST:PDE4D:EDN1:JARID2:AIF1:CTGF:UTRN:CAV1:FBXO32:NOTCH1:DMD:FLNA
GO_RESPONSE_TO_HORMONE	502	136	0.000504932	0.0112804	GNB1:WDTC1:PTAFR:JUN:LEPR:PRKACB:CTSS:SHC1:TOMM20:HNRNPU-AS1:HNRNPU:EIF4EBP2:DDIT4:PTPRE:CAT:CRY2:MDK:RELA:CCND1:PRCP:YAP1:SIK2:CBL:ETS1:ADIPOR2:PHB2:KRAS:NR4A1:CALCOCO1:CDK4:RAP1B:OSBPL8:ATP2B1:PEBP1:PXN:NCOR2:FOXO1:RB1:MAX:ZFP36L1:FOS:THBS1:FBN1:RAB8B:PIAS1:ABHD2:IGF1R:SOCS1:EEF2K:PRKCB:GOT2:APRT:ARRB2:PER1:RARA:STAT3:COL1A1:NME1:DDX5:GRB2:SOCS3:RAB31:ROCK1:DSG2:KANK2:JUNB:PRKACA:GPI:ZFP36:FOSB…
GO_EPITHELIUM_DEVELOPMENT	553	148	0.000516808	0.0115107	DVL1:SKI:CTNNBIP1:MTHFR:EPHA2:LUZP1:PHACTR4:MYCL:SSBP3:TACSTD2:JUN:PRKACB:CYR61:RAP1A:RHOC:TAGLN2:PBX1:PLXNA2:VIM:ARHGAP12:VCL:ACTA2:CD151:CDKN1C:ILK:CAT:CD44:RELA:CPT1A:CCND1:NUMA1:YAP1:TAGLN:TNFRSF1A:PHB2:FOXJ2:KRAS:BHLHE41:STAT6:RAP1B:CEP290:KDM2B:RILPL2:RILPL1:TMED2:SPRY2:EFNB2:COL4A1:NFATC4:LGALS3:HIF1A:ZFP36L1:MAP2K1:SMAD3:FEM1B:PML:PKD1:MAF:ARRB2:PFN1:KDM6B:RARA:SMURF2:GNA13:GRB2:SOCS3:ROC…
GO_NEGATIVE_REGULATION_OF_CELL_DEATH	528	142	0.000535848	0.0118987	NOC2L:DFFA:EYA3:AGO4:JUN:CYR61:LAMTOR5:MCL1:HAX1:SHC1:ARHGEF2:FCER1G:KIFAP3:DSTYK:ITGB1:IFIT3:BNIP3:ADAM8:ILK:MTRNR2L8:CAT:CD44:API5:CREB3L1:MDK:FTH1:RELA:MRE11A:YAP1:BIRC2:ZNF259:CBL:SORL1:CCND2:PHB2:KRAS:TM7SF3:NCKAP1L:LRP1:UNG:KDM2B:FOXO1:NAA16:SPRY2:GAS6:NFATC4:NFKBIA:LGALS3:HIF1A:AREL1:THBS1:SMAD3:PIAS1:WDR73:IGF1R:EEF2K:ARRB2:EVI2B:CCL2:RFFL:RARA:STAT3:SOCS3:ROCK1:MALT1:KANK2:GPI:PAK4:AXL:P…
GO_TISSUE_MIGRATION	173	55	0.00055187	0.0122176	EPHA2:MACF1:TACSTD2:JUN:PKN2:ITGB1:ACTA2:PRCP:ETS1:HDAC7:NR4A1:DCN:PXN:HMGB1:EFNB2:HIF1A:EVL:SPRED1:THBS1:PFN1:MAP3K3:MAPRE2:KANK2:GPI:ITGB1BP1:ROCK2:CYP1B1:MAP4K4:CLASP1:ZEB2:DPP4:BMPR2:NRP2:SP100:FERMT1:ITGB2:HMOX1:MYH9:TGFBR2:WNT5A:FOXP1:PLXND1:PIK3CA:SLIT2:MEF2C:SPARC:RREB1:EDN1:VEGFA:LOXL2:PTK2B:ADAM9:ABL1:NOTCH1:PRKX
GO_TRANSFORMING_GROWTH_FACTOR_BETA_PRODUCTION	22	12	0.000561829	0.0124007	LRRC32:LUM:HIF1A:THBS1:SMAD3:LGALS9:TYROBP:ITGB6:ATF2:CREB1:CD2AP:ATP6AP2
GO_ALPHA_BETA_T_CELL_ACTIVATION	53	22	0.000574703	0.0126469	IL6R:PTPRC:NCKAP1L:STAT6:HMGB1:HSPH1:SOCS1:IL4R:LGALS9:RARA:STAT3:MALT1:BCL3:TGFBR2:FOXP1:NFKBIZ:SH3RF1:IRF1:HLA-E:SYK:ABL1:ELF4
GO_REGULATION_OF_LEUKOCYTE_MIGRATION	77	29	0.000590783	0.012962	PTAFR:IL6R:ADAM8:C3AR1:ANO6:NCKAP1L:CMKLR1:HMGB1:GAS6:LGALS3:THBS1:MAPK3:LGALS9:CCL2:APP:HMOX1:RAC2:OXSR1:CCR1:WNT5A:SLIT2:CD74:EDN1:AIF1:MAPK14:VEGFA:RAC1:PTK2B:MSN
GO_REGULATION_OF_MUSCLE_HYPERTROPHY	37	17	0.00059624	0.0130427	TNFRSF1B:RGS2:ATP2B4:TNFRSF1A:FOXO1:SMAD3:MEF2A:ROCK1:CTDP1:ROCK2:PPARA:LMCD1:PPP3CA:IL6ST:EDN1:JARID2:NOTCH1
GO_RENAL_SYSTEM_DEVELOPMENT	143	47	0.00060558	0.0132078	CTNNBIP1:TACSTD2:NFIA:APH1A:IL6R:PBX1:CENPF:ACTA2:ARL3:CDKN1C:ILK:CAT:YAP1:CEP290:DCN:EFNB2:COL4A1:FBN1:SMAD3:PKD1:NUP93:RARA:KANK2:BAX:ID2:ITGA6:CFLAR:TRAF3IP1:BMP2:SDC4:ADAMTS1:WNT5A:NPHP3:MME:SLIT2:PDGFRA:IRX2:BASP1:C5orf42:MEF2C:EGR1:FOXC1:VEGFA:PDGFA:MYC:NOTCH1:PRKX
GO_REGULATION_OF_CARDIAC_CONDUCTION	25	13	0.000608584	0.013234	ATP1B1:ATP2B4:ITPR2:ATP2B1:PRKACA:CALM3:SLC8A1:CALM2:ITPR1:PDE4D:CAV1:ASPH:FLNA
GO_DIVALENT_INORGANIC_CATION_HOMEOSTASIS	166	53	0.000616612	0.013369	GNB1:ATP1B1:ABL2:PTPRC:ATP2B4:PDZD8:BNIP3:C3AR1:ITPR2:LRP1:TMTC2:ATP2B1:CMKLR1:HMGB1:LPAR6:ERO1L:SLC24A1:SMAD3:NPTN:PML:PKD1:PRKCB:MT2A:GNA13:PRKACA:CALM3:BAX:FPR1:SLC8A1:CALM2:CXCR4:SLC39A10:SLC11A1:FKBP1A:APP:ITPR1:CCR1:WNT5A:ATP2C1:ATP13A3:PDGFRA:TMEM165:PDE4D:STC2:EDN1:IBTK:FYN:CAV1:SLC39A14:PTK2B:JAK2:ABL1:DMD
GO_POSITIVE_REGULATION_OF_INTERLEUKIN_6_PRODUCTION	34	16	0.000619605	0.0133944	PTAFR:IL6R:ARHGEF2:FCER1G:HMGB1:LGALS9:STAT3:TYROBP:MAVS:APP:MYD88:WNT5A:ZBTB20:AIF1:DDX58:TLR4
GO_B_CELL_RECEPTOR_SIGNALING_PATHWAY	28	14	0.000630369	0.0135514	MNDA:PTPRC:NCKAP1L:IGHM:PRKCB:CMTM3:BAX:SLC39A10:NFATC2:MAPK1:FOXP1:MEF2C:SYK:ABL1
GO_MUSCLE_HYPERTROPHY	50	21	0.000631985	0.0135514	TNFRSF1B:RGS2:ATP2B4:TNFRSF1A:FOXO1:SMAD3:MEF2A:ROCK1:CTDP1:ROCK2:TIAM1:PPARA:LMCD1:PPP3CA:SORBS2:IL6ST:MEF2C:EDN1:JARID2:EZH2:NOTCH1
GO_LIPOPOLYSACCHARIDE_MEDIATED_SIGNALING_PATHWAY	31	15	0.000632397	0.0135514	PTAFR:SIGIRR:NFKBIA:MAPK3:CCL2:MALT1:CARD8:HCK:MAPK1:MAPK14:TNFAIP3:MTDH:TRIB1:TLR4:IRAK1
GO_REGULATION_OF_PROTEIN_POLYMERIZATION	132	44	0.000639443	0.0136274	CAPZA1:HAX1:ADD3:ARL2:NUMA1:FCHSD2:EPS8:NCKAP1L:EVL:TMOD3:C15orf38:PFN1:GRB2:GMFG:VASP:MYADM:CDC42EP3:SPTBN1:ACTR2:CAPG:CLASP1:WIPF1:HCK:PREX1:CDC42EP1:TWF2:PRKCD:HCLS1:ADD1:SLIT2:FER:FCHSD1:LRRC16A:ARHGAP18:RAC1:PPP1R9A:ARPC1B:CAPZA2:PTK2B:CDK5RAP2:SPTAN1:ABL1:CAMSAP1:WAS
GO_POSITIVE_REGULATION_OF_CELLULAR_COMPONENT_BIOGENESIS	289	84	0.000639654	0.0136274	EPHA2:SH3GLB1:FNBP1L:RHOC:CHD1L:S100A10:FAM178A:ARL2:NUMA1:ARAP1:FCHSD2:ATM:EPS8:NCKAP1L:PXN:GTF2H3:EVL:WARS:SMAD3:C15orf38:CCP110:EEF2K:FHOD1:ATMIN:PIEZO1:PFN1:PLEKHM1:SNF8:GRB2:SEPT9:ROCK1:GMFG:VASP:BAX:MED25:NUP62:ITGB1BP1:ROCK2:CDC42EP3:RHOQ:CCDC88A:ACTR2:PLEK:MAP4K4:LIMS1:CLASP1:WIPF1:WDR75:CREB1:HCK:SDC4:ZMYND8:RAC2:CDC42EP1:TWF2:CEP135:SYNPO2:FNIP2:DIMT1:FER:APC:FCHSD1:EDN1:LRRC16A:FLOT1:V…
GO_NEURAL_TUBE_DEVELOPMENT	88	32	0.000646574	0.013735	DVL1:SKI:MTHFR:EPHA2:LUZP1:PHACTR4:SSBP3:PRKACB:PLXNA2:KDM2B:TMED2:HIF1A:ZFP36L1:PKD1:PFN1:RARA:PRKACA:VASP:ZEB2:TRAF3IP1:SDC4:PLXNB2:SETD2:WNT5A:NPHP3:SHROOM3:PTK7:RALA:CTHRC1:ABL1:NOTCH1:ATP6AP2
GO_NEGATIVE_REGULATION_OF_CELL_DIFFERENTIATION	326	93	0.000665875	0.0140937	SKI:C1QC:TACSTD2:GBP1:ARHGEF2:PBX1:RGS2:RAB7L1:HNRNPU-AS1:HNRNPU:VIM:ITGB1:DENND5A:SDHAF2:CCND1:YAP1:DIXDC1:SORL1:FOXJ2:KRAS:BHLHE41:HDAC7:LRP1:HMGB1:FOXO1:RB1:EFNB2:NFATC4:NFKBIA:ZFP36L1:KLF13:MEIS2:EIF2AK4:B2M:FBN1:SMAD3:HMG20A:VASN:SOCS1:IL4R:FAM101B:PMP22:RARA:STAT3:NME1:CTDP1:LDLR:ZFP36:ID2:ITGB1BP1:LBH:ZFP36L2:MAP4K4:COL3A1:COL5A2:CFLAR:INPP5D:BMP2:MAFB:NFATC2:CTSZ:APP:MAPK1:YWHAH:LGALS1:TS…
GO_RESPONSE_TO_REACTIVE_OXYGEN_SPECIES	136	45	0.000667295	0.0140937	JUN:CAPN2:EGLN1:MTR:BNIP3:LDHA:CAT:RELA:ETS1:STAT6:PXN:CAMKK2:FOXO1:FOS:FBLN5:MAPK3:KDM6B:COL1A1:KLF2:AXL:CYP1B1:SLC8A1:CFLAR:ANKZF1:STK25:SIRPA:MAPK1:HMOX1:PRKCD:SOD3:PDGFRA:FER:RIPK1:EDN1:FYN:MAP3K5:TNFAIP3:SOD2:EZH2:AGAP3:PTK2B:ADAM9:HSF1:ABL1:SETX
GO_CELLULAR_RESPONSE_TO_OXIDATIVE_STRESS	182	57	0.00066998	0.0141099	JUN:SLC25A24:MCL1:NCF2:MTR:BNIP3:CAT:RELA:ETS1:STAT6:PXN:CAMKK2:FOXO1:ERO1L:HIF1A:FOS:FBLN5:PML:MAPK3:KDM6B:NFE2L1:KLF2:AXL:CYP1B1:PNPT1:VRK2:CFLAR:LANCL1:ANKZF1:STK25:SIRPA:MAPK1:HMOX1:MGAT3:PRKCD:CPEB2:SOD3:PDGFRA:GPX8:FER:RIPK1:AIF1:FYN:NCOA7:MAP3K5:TNFAIP3:SOD2:EZH2:AGAP3:GSR:HSF1:JAK2:TLR4:ABL1:SETX:CYBB:NONO
GO_T_CELL_DIFFERENTIATION	99	35	0.000673789	0.0141496	LEPR:FCER1G:PTPRC:SOX13:ZMIZ1:ADAM8:NCKAP1L:STAT6:HMGB1:ZFP36L1:B2M:SOCS1:IL4R:CYLD:LGALS9:RARA:STAT3:MALT1:STK11:BCL3:ZFP36L2:MAFB:PREX1:NFATC2:TGFBR2:FOXP1:NFKBIZ:SH3RF1:IRF1:EGR1:CD74:PRELID1:CDK6:SYK:ABL1
GO_POSITIVE_REGULATION_OF_AXONOGENESIS	47	20	0.000691566	0.0144404	MACF1:PLXNA2:KIAA1598:ILK:LRP1:PLXNC1:MAP2K1:STK11:ZEB2:BMPR2:STK25:TIAM1:PLXNB2:TWF2:PLXND1:SLIT2:RUFY3:MAP1B:VEGFA:SEMA4D
GO_CYTOKINE_METABOLIC_PROCESS	47	20	0.000691566	0.0144404	PTAFR:PTPRC:MAPKAPK2:SIGIRR:RELA:THBS1:STAT3:TYROBP:ZFP36:BCL3:NMI:INPP5D:APP:HMOX1:WNT5A:IRF1:EGR1:SYK:TLR4:CYBB
GO_RESPONSE_TO_STEROID_HORMONE	206	63	0.000722847	0.0150508	PTAFR:HNRNPU-AS1:HNRNPU:DDIT4:CRY2:MDK:RELA:CCND1:YAP1:PHB2:KRAS:NR4A1:CALCOCO1:ATP2B1:PEBP1:NCOR2:FOXO1:RB1:ZFP36L1:FOS:THBS1:PIAS1:ABHD2:ARRB2:PER1:RARA:COL1A1:DDX5:DSG2:KANK2:GPI:ZFP36:FOSB:CALM3:NCOA1:LBH:ZFP36L2:HNMT:CFLAR:YWHAH:RBFOX2:TSPO:PPARA:THRB:TGFBR2:GLB1:FOXP1:SLIT2:IGFBP7:SPP1:HMGB2:PPAP2A:NR3C1:SPARC:EDN1:AIF1:CTGF:CAV1:ADAM9:FBXO32:JAK2:ALAD:NOTCH1:CYBB
GO_REGULATION_OF_VESICLE_MEDIATED_TRANSPORT	270	79	0.000739309	0.0153501	DVL1:PTAFR:RAP1A:CD84:FCER1G:ABL2:PTPRC:RAB7L1:CD151:ARHGAP1:MTMR2:CBL:SORL1:ANO6:NCKAP1L:LRP1:RAP1B:HMGB1:EFNB2:GAS6:LGALS3:NUMB:EHD4:B2M:RAB27A:RAB8B:MAP2K1:MFGE8:EEF2K:PRKCB:IL4R:MAPK3:STX4:ARRB2:LGALS9:UNC119:CCL2:SNF8:RAB31:ROCK1:SH3GL1:AXL:APOC1:CALM3:RAB10:PREPL:MERTK:CLASP1:SLC11A1:ACSL3:SIRPA:HCK:SDC4:ITGB2:MAPK1:HMOX1:RAC2:GNAI2:WNT5A:APPL1:PPP3CA:FER:SEPT8:FLOT1:VEGFA:CD2AP:STXBP5:RAC1…
GO_CELL_CELL_ADHESION_VIA_PLASMA_MEMBRANE_ADHESION_MOLECULES	64	25	0.000741539	0.015353	NEXN:VCAM1:CD84:SELL:KIFAP3:ITGB1:RIC8A:NPTN:PKD1:CDH11:DSC3:DSG2:PVR:MYADM:BMP2:ITGB2:PLXNB2:TGFBR2:ALCAM:ATP2C1:PALLD:FAT1:EMB:MAPK14:GPC4
GO_RESPONSE_TO_MINERALOCORTICOID	17	10	0.000746915	0.0154208	CCND1:KRAS:ATP2B1:PEBP1:FOS:FOSB:CALM3:EDN1:CTGF:CYBB
GO_LAMELLIPODIUM_ASSEMBLY	44	19	0.000752301	0.0154886	EPHA2:ITGB1:VCL:ABLIM1:ARFIP2:SSH1:SH2B1:SSH2:CCDC88A:RAC2:TWF2:SLIT2:FER:ABLIM3:LRRC16A:FSCN1:RAC1:WAS:ARHGEF6
GO_LYMPHOCYTE_ACTIVATION_INVOLVED_IN_IMMUNE_RESPONSE	71	27	0.0007576	0.0155541	FCER1G:PTPRC:ITFG2:STAT6:UNG:HMGB1:LGALS3:EIF2AK4:RAB27A:IL4R:EXOSC6:LGALS9:RARA:STAT3:MALT1:BCL3:MSH2:SLC11A1:LGALS1:FOXP1:NFKBIZ:RNF168:WHSC1:PTK2B:NBN:TLR4:ABL1
GO_ORGAN_GROWTH	89	32	0.00080946	0.0164969	LEPR:THBS3:RGS2:YAP1:DUSP6:SPRY2:RARA:CTDP1:COL6A3:COL6A1:COL6A2:MAPK1:PPARA:TGFBR2:COL7A1:HEG1:C3orf58:RBPJ:WWC2:SORBS2:BASP1:MEF2C:FOXC1:RIPK1:EDN1:JARID2:MAPK14:WNT2:SCARA3:MATN2:COL27A1:NOTCH1
GO_REGULATION_OF_CARDIAC_MUSCLE_TISSUE_DEVELOPMENT	41	18	0.000812503	0.0164969	RGS2:YAP1:EFNB2:ARRB2:CTDP1:CREB1:BMP2:MAPK1:PPARA:TGFBR2:RBPJ:MEF2C:RIPK1:EDN1:JARID2:MAPK14:WNT2:NOTCH1
GO_POSITIVE_REGULATION_OF_MUSCLE_CELL_DIFFERENTIATION	41	18	0.000812503	0.0164969	CAPN2:EFNB2:PIAS1:MEF2A:IL4R:ARRB2:SPAG9:TCF3:NFATC2:RBPJ:MEF2C:MAML1:EDN1:FLOT1:MAPK14:SOD2:ABL1:MORF4L2
GO_POSITIVE_REGULATION_OF_B_CELL_ACTIVATION	41	18	0.000812503	0.0164969	PTPRC:CD81:NCKAP1L:STAT6:UNG:TNFSF13B:IGHM:EXOSC6:MSH2:SLC39A10:INPP5D:NFATC2:WHSC1:MEF2C:CD74:SYK:TLR4:ATP11C
GO_REGULATION_OF_PROTEIN_COMPLEX_DISASSEMBLY	61	24	0.000833045	0.0166666	CAPZA1:ARHGEF2:ADD3:BNIP3:EPS8:CFL2:TMOD3:IGF1R:SMCR8:SPTBN1:PLEK:CAPG:CLASP1:TWF2:ADD1:WDR1:MAP1B:APC:LRRC16A:CAPZA2:ASPH:SPTAN1:SETX:CAMSAP1
GO_REGULATION_OF_PRODUCTION_OF_MOLECULAR_MEDIATOR_OF_IMMUNE_RESPONSE	61	24	0.000833045	0.0166666	TNFRSF1B:FCER1G:PTPRC:CUEDC2:STAT6:UNG:B2M:IL4R:MAPK3:STX4:EXOSC6:MALT1:BST2:GPI:MSH2:MAVS:HMOX1:WNT5A:WHSC1:CD74:HLA-E:MAPK14:DDX58:TLR4
GO_REGULATION_OF_HYDROLASE_ACTIVITY	653	170	0.000834462	0.0166666	DFFA:EPHA2:PTAFR:PHACTR4:SMAP2:JUN:LEPR:DNAJB4:CYR61:ARHGAP29:F3:LAMTOR5:RAP1A:RHOC:S100A10:IFI16:ARHGAP30:ATP1B1:ABL2:RGS2:PTPRC:PLXNA2:PPP2R5A:EGLN1:HNRNPU-AS1:HNRNPU:ARHGAP21:ARHGAP12:ITGB1:SHOC2:RIC8A:SBF2:CD44:CRY2:ARHGAP1:ARL2:CST6:AIP:ARAP1:SERPINH1:SYTL2:BIRC2:CASP1:SORL1:NCKAP1L:LRP1:SRGAP1:PLXNC1:GIT2:PEBP1:TMED2:HMGB1:DNAJC15:SPRY2:FARP1:GAS6:OXA1L:LGALS3:PPP2R5C:APOPT1:SPRED1:THBS1:RP…
GO_RESPONSE_TO_OXIDATIVE_STRESS	267	78	0.000837569	0.0166833	JUN:SLC25A24:MCL1:NCF2:CAPN2:EGLN1:MTR:PDLIM1:BNIP3:LDHA:CAT:RELA:ETS1:STAT6:PEBP1:PXN:CAMKK2:FOXO1:ERO1L:HIF1A:FOS:FBLN5:PML:MAPK3:STX4:KDM6B:NFE2L1:COL1A1:KLF2:AXL:XRCC1:PXDN:CYP1B1:SLC8A1:PNPT1:VRK2:CFLAR:LANCL1:ANKZF1:STK25:SIRPA:ATRN:APP:MAPK1:HMOX1:MGAT3:OXSR1:PRKCD:CPEB2:SOD3:PDGFRA:GPX8:FER:STC2:RIPK1:EDN1:AIF1:FYN:NCOA7:MAP3K5:TNFAIP3:SOD2:EZH2:AGAP3:PTK2B:SCARA3:RBPMS:GSR:ADAM9:HSF1:JAK…
GO_MUSCLE_ORGAN_DEVELOPMENT	168	53	0.000843928	0.0167193	SKI:RGS2:CENPF:EGLN1:SVIL:YAP1:TAGLN:DCN:RB1:EFNB2:CFL2:FOS:SMAD3:MEF2A:ZFHX3:ARRB2:COPRS:DDX5:CTDP1:COL3A1:CFLAR:CREB1:COL6A3:GPC1:FKBP1A:GPCPD1:BMP2:MAPK1:PPARA:TGFBR2:WNT5A:FLNB:HEG1:RBPJ:PPP3CA:BASP1:HOMER1:MEF2C:EGR1:FOXC1:RIPK1:EDN1:JARID2:FLOT1:MAPK14:UTRN:FOXK1:CAV2:CAV1:WNT2:NOTCH1:DMD:TAZ
GO_RESPONSE_TO_METAL_ION	168	53	0.000843928	0.0167193	C1QA:JUN:VCAM1:SLC25A24:S100A16:S100A13:BNIP3:CAT:CCND1:CDK4:PEBP1:ALOX5AP:NFATC4:HIF1A:FOS:THBS1:B2M:IREB2:MEF2A:EEF2K:MAPK3:FUS:MT2A:NFE2L1:JUNB:GPI:FOSB:PPP5C:CALM3:ID2:CALM2:CYBRD1:CREB1:APP:MAPK1:HMOX1:TSPO:WNT5A:ADD1:QDPR:SOD3:PPP3CA:HOMER1:MEF2C:SPARC:EDN1:CAV1:LOXL2:PTK2B:ADAM9:HSF1:ALAD:CYBB
GO_RESPONSE_TO_TOXIC_SUBSTANCE	243	72	0.00085189	0.0168317	KIF1B:JUN:VCAM1:RGS2:CAPN2:KCNK1:BNIP3:LDHA:CAT:RELA:CCND1:BIRC2:CBL:ETS1:EPS8:ITPR2:HNRNPA1:STAT6:CDK4:PEBP1:ALOX5AP:FOXO1:FOS:FBLN5:MAPK3:MT2A:GOT2:KDM6B:RARA:STAT3:COL1A1:KLF2:AXL:CALM3:SEPW1:BAX:PXDN:EIF2AK2:CYP1B1:SLC8A1:ACTR2:CREB1:ANKZF1:STK25:SIRPA:MAPK1:HMOX1:PPARA:PRKCD:SOD3:PPP3CA:GPX8:KDM3B:EGR1:SPARC:RIPK1:EDN1:FYN:MAP3K5:TNFAIP3:SOD2:ACTB:PPP1R9A:EZH2:PTK2B:GSR:ADAM9:HSF1:ALAD:ABL1:…
GO_PEPTIDYL_SERINE_MODIFICATION	172	54	0.00086012	0.0168672	MKNK1:PKN2:HAX1:ATP2B4:MAPKAPK2:DDIT4:ILK:CD44:RPS6KA4:ATM:STK38L:DCN:MAPKAPK5:SPRY2:GAS6:VRK1:MARK3:PKD1:PRKCB:MAPK3:ARRB2:TLK2:CSNK1D:ROCK1:MKNK2:SH2D3A:PRKACA:BAX:ROCK2:VRK2:CAB39:APP:MAPK1:CSNK1E:TGFBR2:PRKCD:WNT5A:HCLS1:PIK3CA:FNIP2:PDE4D:CSNK1G3:RIPK1:MAPK14:VEGFA:SGK1:CAV1:HIPK2:SGK3:SYK:NEK6:PRKX:RPS6KA3:DMD
GO_TRANSMEMBRANE_RECEPTOR_PROTEIN_SERINE_THREONINE_KINASE_SIGNALING_PATHWAY	172	54	0.00086012	0.0168672	SKI:JUN:CYR61:VIM:UBE2D1:CDKN1C:ILK:FAM89B:NUMA1:LRRC32:CBL:PXN:FERMT2:LTBP2:FOS:THBS1:FBN1:SMAD3:PML:VASN:MAPK3:NUP93:ARRB2:DDX5:SMURF2:STK11:SPTBN1:ACVR2A:COL3A1:BMPR2:CREB1:FKBP1A:FERMT1:BMP2:TGFBR2:WNT5A:APPL1:RBPJ:FST:EGR1:DUSP22:MAPK14:CITED2:COL1A2:CAV2:CAV1:HIPK2:ZYX:RBPMS:ADAM9:ABL1:NOTCH1:XIAP:IRAK1
GO_BONE_MINERALIZATION	51	21	0.000864278	0.0168672	ISG15:CYR61:SRGN:MGP:ANO6:HIF1A:SMAD3:FAM101B:SBNO2:SLC8A1:ACVR2A:BMPR2:BMP2:CCR1:BMP2K:ANKH:MEF2C:ENPP1:COL1A2:PTK2B:BCOR
GO_CHONDROCYTE_DIFFERENTIATION	51	21	0.000864278	0.0168672	RELA:SERPINH1:SMAD3:MAF:FAM101B:KIAA1715:BMPR2:COL6A3:BMP2:COL6A1:COL6A2:TGFBR2:COL7A1:MEF2C:TGFBI:MAPK14:CTGF:LOXL2:SCARA3:MATN2:COL27A1
GO_REGULATION_OF_GRANULOCYTE_CHEMOTAXIS	20	11	0.000875025	0.0168672	C3AR1:NCKAP1L:CMKLR1:THBS1:MAPK3:RAC2:SLIT2:CD74:EDN1:MAPK14:RAC1
GO_RESPONSE_TO_PROGESTERONE	20	11	0.000875025	0.0168672	RELA:YAP1:FOS:THBS1:ABHD2:DSG2:GPI:FOSB:NCOA1:TSPO:CAV1
GO_POSITIVE_REGULATION_OF_PHOSPHATASE_ACTIVITY	20	11	0.000875025	0.0168672	PTPRC:SMAD3:CALM3:PPP1R15A:CALM2:PLEK:SLC39A10:BMP2:ITGA1:MEF2C:JAK2
GO_NEGATIVE_REGULATION_OF_LEUKOCYTE_APOPTOTIC_PROCESS	20	11	0.000875025	0.0168672	NOC2L:FCER1G:GAS6:HIF1A:AXL:MERTK:SLC39A10:FOXP1:HCLS1:CD74:TSC22D3
GO_RESPONSE_TO_INTERFERON_BETA	20	11	0.000875025	0.0168672	MNDA:IFI16:CAPN2:IFITM2:IFITM3:XAF1:BST2:PNPT1:IFNAR2:AP000295,9:PLSCR1:IRF1
GO_ESTABLISHMENT_OR_MAINTENANCE_OF_CELL_POLARITY	130	43	0.000876635	0.0168672	RHOC:ARHGEF2:RHOU:SDCCAG8:FRMD4A:KIAA1598:ILK:PARVA:FAM89B:NUMA1:NCKAP1L:RNF41:RAP1B:SPRY2:MARK3:PKD1:LLGL2:CYTH1:ROCK1:STK11:ROCK2:RAB10:RHOQ:ACTR2:CLASP1:RND3:STK25:FERMT1:MYH9:MAP4:WNT5A:AMOTL2:WDR1:RUFY3:FAT1:MAP1B:PTK7:DST:FSCN1:PTK2B:UBXN2B:CDK5RAP2:MSN
GO_POSITIVE_REGULATION_OF_CYTOSKELETON_ORGANIZATION	134	44	0.000911421	0.0174907	RHOC:S100A10:HAX1:ARL2:NUMA1:FCHSD2:NCKAP1L:PXN:CFL2:EVL:SMAD3:C15orf38:FHOD1:PFN1:GRB2:GMFG:VASP:NUP62:ITGB1BP1:ROCK2:CDC42EP3:ACTR2:PLEK:CLASP1:WIPF1:HCK:SDC4:CDC42EP1:HCLS1:WDR1:SYNPO2:FER:FCHSD1:EDN1:LRRC16A:CTGF:RAC1:ARPC1B:PTK2B:UBXN2B:CDK5RAP2:ABL1:WAS:FLNA
GO_NITRIC_OXIDE_BIOSYNTHETIC_PROCESS	35	16	0.000920794	0.0176246	ATP2B4:SMAD3:KLF2:ROCK2:CYP1B1:SIRPA:ITGB2:TSPO:EDN1:AIF1:DDAH2:RAC1:CAV1:PTK2B:JAK2:TLR4
GO_FIBROBLAST_GROWTH_FACTOR_RECEPTOR_SIGNALING_PATHWAY	58	23	0.000934113	0.0178331	DSTYK:SHOC2:POLR2L:CREB3L1:CBL:HNRNPA1:SPRY2:SPRED1:THBS1:NPTN:MAPK3:POLR2A:GRB2:POLR2E:POLR2D:GPC1:MAPK1:RBFOX2:WNT5A:NDST1:CTGF:POLR2J:SETX
GO_MUSCLE_CONTRACTION	108	37	0.000946329	0.0180195	PTAFR:ATP1B1:RGS2:PPP1R12B:VIM:VCL:ACTA2:MYOF:SSPN:PXN:TMOD3:MYH11:ROCK1:DSG2:PRKACA:TPM4:CALM3:ROCK2:SLC8A1:CALM2:MYL9:SLMAP:PIK3CA:ITGA1:PDE4D:HOMER1:EDN1:GJA1:CTGF:UTRN:CAV1:CALD1:ASPH:TLN1:DMD:FLNA:TAZ
GO_CELLULAR_RESPONSE_TO_REACTIVE_OXYGEN_SPECIES	97	34	0.000950804	0.0180197	JUN:MTR:BNIP3:RELA:ETS1:STAT6:PXN:CAMKK2:FOXO1:FOS:FBLN5:MAPK3:KDM6B:KLF2:AXL:CYP1B1:CFLAR:ANKZF1:STK25:SIRPA:MAPK1:PRKCD:SOD3:PDGFRA:FER:RIPK1:MAP3K5:TNFAIP3:SOD2:EZH2:AGAP3:HSF1:ABL1:SETX
GO_CARTILAGE_DEVELOPMENT_INVOLVED_IN_ENDOCHONDRAL_BONE_MORPHOGENESIS	23	12	0.000951243	0.0180197	THBS3:SERPINH1:RARA:COL1A1:COL6A3:COL6A1:COL6A2:TGFBR2:COL7A1:SCARA3:MATN2:COL27A1
GO_REGULATION_OF_MUSCLE_ADAPTATION	48	20	0.000954209	0.0180206	TNFRSF1B:RGS2:ATP2B4:TNFRSF1A:FOXO1:SMAD3:MEF2A:ROCK1:CTDP1:ROCK2:PPARA:LMCD1:PPP3CA:IL6ST:EDN1:JARID2:AIF1:UTRN:FBXO32:NOTCH1
GO_ACTIVATION_OF_MAPK_ACTIVITY	79	29	0.000956548	0.0180206	SHC1:PTPRC:MAPKAPK2:DUSP5:CD81:DUSP6:MAPKAPK5:MAP4K5:THBS1:MAP2K1:MAPK3:SPAG9:S1PR2:FPR1:CXCR4:MLTK:BMP2:MAPK1:WNT5A:ITGA1:CD74:RIPK1:MAPK14:MAP3K5:RP1-111D6,3:TAB2:MDFIC:SYK:TLR4:IRAK1
GO_STRIATED_MUSCLE_CELL_PROLIFERATION	32	15	0.000961099	0.0180206	YAP1:STAT3:CFLAR:MAPK1:TGFBR2:C3orf58:RBPJ:MEF2C:FOXC1:RIPK1:JARID2:MAPK14:WNT2:JAK2:NOTCH1
GO_MONONUCLEAR_CELL_MIGRATION	32	15	0.000961099	0.0180206	S100A12:IL6R:C3AR1:ANO6:CMKLR1:HMGB1:LGALS3:THBS1:MAPK3:CCL2:SIRPA:CCR1:SLIT2:AIF1:MAPK14
GO_RESPONSE_TO_CALCIUM_ION	65	25	0.000967981	0.0180575	JUN:SLC25A24:S100A16:CCND1:PEBP1:ALOX5AP:FOS:THBS1:MEF2A:EEF2K:FUS:JUNB:FOSB:CALM3:CALM2:WNT5A:ADD1:PPP3CA:HOMER1:MEF2C:SPARC:EDN1:CAV1:PTK2B:ADAM9
GO_ACTIN_CYTOSKELETON_REORGANIZATION	65	25	0.000967981	0.0180575	HAX1:SHC1:ABL2:CDC42BPA:PARVA:ARAP1:EPS8:S1PR2:GMFG:PLEK:ANTXR1:HCK:MYH9:HCLS1:ATP2C1:PDGFRA:FER:NEDD9:PTK7:CD2AP:RALA:MKLN1:PTK2B:ABL1:FLNA
GO_MUSCLE_CELL_DEVELOPMENT	72	27	0.000973153	0.0180617	SKI:RGS2:HNRNPU-AS1:HNRNPU:ITGB1:MYOF:NFATC4:CFL2:TMOD3:MEF2A:MYH11:CTDP1:SLC8A1:CFLAR:NFATC2:PPARA:WDR1:PDGFRA:PPP3CA:SORBS2:HOMER1:MEF2C:MAML1:EDN1:VEGFA:CAV2:NOTCH1:DMD
GO_PLATELET_DEGRANULATION	72	27	0.000973153	0.0180617	TAGLN2:FCER1G:SRGN:VCL:FERMT3:ENDOD1:CD9:GAS6:ACTN1:THBS1:LGALS3BP:TMX3:CFD:PLEK:APP:WDR1:LHFPL2:SPARC:GTPBP2:VEGFA:PDGFA:FAM3C:FAM49B:TLN1:SYK:TIMP1:FLNA
GO_REGULATION_OF_INFLAMMATORY_RESPONSE	142	46	0.000975578	0.0180617	TNFRSF1B:PLA2G2A:C1QA:S100A12:FCER1G:PTPRC:CUEDC2:ADAM8:RELA:BIRC2:ATM:ETS1:TNFRSF1A:RB1:NFKBIA:SMAD3:CYLD:PER1:NFE2L1:SOCS3:SBNO2:LDLR:IL1R2:IL1RL1:SIRPA:HCK:APP:ITGB2:IL17RA:PPARA:MYD88:PRKCD:WNT5A:APPL1:FOXP1:NFKBIZ:IL6ST:TNIP1:HLA-E:MAPK14:TNFAIP3:NAPEPLD:ZYX:JAK2:TLR4:XIAP
GO_CHEMICAL_SYNAPTIC_TRANSMISSION_POSTSYNAPTIC	26	13	0.000984534	0.0180962	DVL1:MTMR2:SSH1:ARRB2:SH3GL1:S1PR2:ZMYND8:APP:PPP3CA:MEF2C:SLC29A1:PPP1R9A:PTK2B
GO_REGULATION_OF_POSTSYNAPTIC_MEMBRANE_POTENTIAL	29	14	0.000984825	0.0180962	DVL1:MTMR2:SSH1:ARRB2:SH3GL1:S1PR2:SLC8A1:ZMYND8:APP:PPP3CA:MEF2C:SLC29A1:PPP1R9A:PTK2B
GO_CELLULAR_RESPONSE_TO_RETINOIC_ACID	29	14	0.000984825	0.0180962	ABL2:YAP1:ATM:PHB2:IREB2:RARA:COL1A1:CREB1:TWF2:WNT5A:PTK7:WNT2:PTK2B:SETX
GO_POSITIVE_REGULATION_OF_SUPRAMOLECULAR_FIBER_ORGANIZATION	127	42	0.00100495	0.0184155	RHOC:S100A10:ARL2:NUMA1:FCHSD2:NCKAP1L:PXN:RB1:CFL2:EVL:SMAD3:C15orf38:FHOD1:PFN1:GRB2:GMFG:VASP:ITGB1BP1:ROCK2:CDC42EP3:ACTR2:PLEK:CLASP1:WIPF1:HCK:SDC4:APP:CDC42EP1:WDR1:SYNPO2:FER:FCHSD1:EDN1:LRRC16A:CTGF:RAC1:ARPC1B:PTK2B:CDK5RAP2:ABL1:WAS:FLNA
GO_NEGATIVE_REGULATION_OF_CELL_ACTIVATION	90	32	0.00100722	0.0184155	MNDA:CD84:PTPRC:LRRC32:ATM:CD9:HMGB1:LGALS3:SOCS1:IL4R:LGALS9:LDLR:TYROBP:AXL:ID2:MERTK:INPP5D:SDC4:SAMSN1:HMOX1:PRKCD:PDGFRA:FER:IRF1:CD74:DUSP22:LST1:TNFRSF21:TNFAIP3:PDGFA:PAG1:VSIG4
GO_REGULATION_OF_NIK_NF_KAPPAB_SIGNALING	55	22	0.00104519	0.0190623	AGO1:AGO3:ILK:RELA:BIRC2:HDAC7:HMGB1:NFKBIA:UACA:CYLD:LGALS9:MALT1:BCL3:EIF2AK2:LIMS1:COPS8:APP:EDN1:C8orf4:TLR4:TSPAN6:IRAK1
GO_NEGATIVE_REGULATION_OF_NEURON_DEATH	105	36	0.00108457	0.0197316	JUN:ADAM8:ILK:MDK:ZNF259:CBL:SORL1:KRAS:LRP1:KDM2B:NFATC4:HIF1A:ARRB2:CCL2:STAT3:ROCK1:GPI:AXL:BAX:MSH2:REL:CREB1:ITSN1:HMOX1:PPARA:PIK3CA:FAM134B:MEF2C:FYN:NCOA7:SOD2:HIPK2:PTK2B:HSF1:JAK2:NONO
GO_POSITIVE_REGULATION_OF_BIOSYNTHETIC_PROCESS	1082	267	0.00109835	0.0199329	DVL1:SKI:CAMTA1:RERE:PTAFR:AGO1:GPBP1L1:SSBP3:JUN:NFIA:CYR61:DR1:HAX1:SHC1:ARHGEF2:C1orf85:CCT3:IFI16:PBX1:DCAF6:SOAT1:FAM129A:PTPRC:SOX13:ELK4:MAPKAPK2:LPGAT1:CAPN2:RNF187:EGLN1:HNRNPU-AS1:HNRNPU:KLF6:VIM:ZMIZ1:ACTA2:PDLIM1:NFKB2:CD81:CDKN1C:ILK:TEAD1:SVIP:CREB3L1:MDK:RPS6KA4:RELA:AIP:YAP1:BIRC2:ATM:ZNF259:KMT2A:RPUSD4:ETS1:TNFRSF1A:FOXJ2:ETV6:MED21:TFCP2:NR4A1:CALCOCO1:HNRNPA1:STAT6:CDK4:CEP290…
GO_RESPONSE_TO_ABIOTIC_STIMULUS	674	174	0.00110205	0.0199509	NOC2L:GNB1:MTHFR:PLOD1:EYA3:PTAFR:B4GALT2:NDC1:JUN:GADD45A:DNAJB4:VCAM1:CTSS:S100A13:ADAM15:ARHGEF2:IFI16:ATP1B1:PTPRC:ATP2B4:MAPKAPK2:CAPN2:EGLN1:NMT2:ITGB1:DDIT4:MYOF:PDLIM1:BNIP3:ADAM8:RIC8A:LDHA:CAT:CRY2:RELA:CCND1:YAP1:BIRC2:CASP1:ATM:CBL:ETS1:CD9:TNFRSF1A:PHB2:KRAS:ITPR2:CDK4:ATP2B1:DCN:IKBIP:PEBP1:HSPH1:FOXO1:NFATC4:NFKBIA:ERO1L:HIF1A:ZFP36L1:FOS:ATXN3:SLC12A6:MEIS2:THBS1:EIF2AK4:SLC24A1:S…
GO_INTERFERON_GAMMA_PRODUCTION	42	18	0.0011458	0.0205545	ISG15:IL6R:HMGB1:GAS6:LGALS9:RARA:AXL:BCL3:IL1RL1:SLC11A1:SIRPA:WNT5A:PDE4D:HLA-DPA1:HLA-DPB1:FAM49B:TLR4:ABL1
GO_REGULATION_OF_LEUKOCYTE_APOPTOTIC_PROCESS	42	18	0.0011458	0.0205545	NOC2L:FCER1G:ADAM8:GAS6:LGALS3:HIF1A:LGALS9:AXL:BAX:MERTK:SLC39A10:WNT5A:FOXP1:HCLS1:MEF2C:CD74:PRELID1:TSC22D3
GO_NEGATIVE_REGULATION_OF_VIRAL_PROCESS	52	21	0.0011665	0.0208607	ISG15:JUN:IFI16:IFITM2:IFITM3:FAM111A:KIAA1551:MPHOSPH8:EIF2AK4:PML:BST2:ZFP36:EIF2AK2:MAVS:FAM208A:PLSCR1:ZNF639:TNIP1:ZC3HAV1:TRIM35:TRIM14
GO_REGULATION_OF_SECRETION	315	89	0.00119663	0.0212445	DVL1:TNFRSF1B:PTAFR:LEPRE1:GBP1:RAP1A:CD58:CD84:FCER1G:SRGN:ADAM8:ARL2:CPT1A:LRRC32:SYTL2:CASP1:TNFRSF1A:ITPR2:TM7SF3:LRP1:RAP1B:HMGB1:GAS6:HIF1A:RAB27A:RAB8B:PML:MCTP2:SOCS1:PRKCB:IL4R:MAPK3:STX4:ARL2BP:LGALS9:SNF8:PIK3C3:GPI:CALM3:CARD8:RAB10:PREPL:SPTBN1:MAP4K4:IL1R2:IL1RL1:CLASP1:DPP4:KLF7:CREB1:PNKD:ACSL3:MAVS:FERMT1:SNX5:SDC4:TIAM1:ITGB2:IL17RA:HMOX1:RAC2:ITPR1:GNAI2:WNT5A:FOXP1:SPP1:PPP3CA…
GO_REGULATION_OF_LYMPHOCYTE_DIFFERENTIATION	80	29	0.00120414	0.0213263	PTPRC:SOX13:ZMIZ1:ADAM8:NCKAP1L:RNF41:HMGB1:GAS6:ZFP36L1:SOCS1:IL4R:CYLD:LGALS9:RARA:MALT1:AXL:ID2:ZFP36L2:INPP5D:NFATC2:TGFBR2:NFKBIZ:SH3RF1:IRF1:CD74:PRELID1:SYK:ABL1:ATP11C
GO_REGULATION_OF_VIRAL_GENOME_REPLICATION	59	23	0.00123083	0.0217467	ISG15:PPIE:PKN2:ADAR:IFI16:IFITM2:IFITM3:FAM111A:KIAA1551:MPHOSPH8:IFI27:EIF2AK4:DDX5:RAD23A:BST2:EIF2AK2:MAVS:FAM208A:PLSCR1:TNIP1:ZC3HAV1:PABPC1:NOTCH1
GO_POSITIVE_REGULATION_OF_ACTIN_FILAMENT_BUNDLE_ASSEMBLY	39	17	0.00124333	0.0219149	RHOC:S100A10:PXN:EVL:SMAD3:FHOD1:PFN1:ITGB1BP1:ROCK2:PLEK:SDC4:SYNPO2:LRRC16A:CTGF:RAC1:ABL1:FLNA
GO_POSITIVE_REGULATION_OF_CYTOKINE_SECRETION	49	20	0.00129797	0.0228232	CD58:CASP1:LRP1:HMGB1:IL4R:MAPK3:LGALS9:CARD8:SPTBN1:IL1RL1:MAVS:FERMT1:IL17RA:WNT5A:AIF1:MAPK14:DDX58:SYK:TLR4:ABL1
GO_PLATELET_AGGREGATION	36	16	0.00133751	0.0234623	VCL:ILK:FERMT3:CD9:GAS6:PLEK:MYL9:MYH9:PRKCD:RAP2B:PDGFRA:METAP1:ACTB:TLN1:SYK:FLNA
GO_GROWTH_PLATE_CARTILAGE_DEVELOPMENT	18	10	0.00136512	0.0238896	THBS3:RARA:COL6A3:COL6A1:COL6A2:TGFBR2:COL7A1:SCARA3:MATN2:COL27A1
GO_TYROSINE_PHOSPHORYLATION_OF_STAT_PROTEIN	33	15	0.00142308	0.0248447	IL6R:TNFRSF1A:SOCS1:ARL2BP:STAT3:SOCS3:HCLS1:PARP9:PARP14:IL6ST:FER:FYN:CAV1:HSF1:JAK2
GO_REGULATION_OF_PROTEIN_SERINE_THREONINE_KINASE_ACTIVITY	280	80	0.00147103	0.0256209	GADD45A:S100A12:SHC1:RGS2:PTPRC:ATP2B4:MAPKAPK2:CCNY:DUSP5:ADAM8:CD81:CDKN1C:ILK:CCND1:SORL1:CCND2:KRAS:CDK4:DUSP6:MAPKAPK5:SPRY2:MAP4K5:SPRED1:THBS1:MAP2K1:IGF1R:PKD1:TRAF7:MAPK3:KSR1:SPAG9:MAP3K3:GADD45B:S1PR2:CALM3:NUP62:FPR1:EIF2AK2:CALM2:CXCR4:ZEB2:MLTK:CCNYL1:CAB39:BMP2:TIAM1:MAPK1:PRKAR2A:PRKCD:WNT5A:HEG1:CCNG2:ACSL1:ITGA1:MAP3K1:APC:CD74:DUSP22:RIPK1:EDN1:MAPK14:CCND3:VEGFA:MAP3K5:TNFAIP3…
GO_PLACENTA_BLOOD_VESSEL_DEVELOPMENT	21	11	0.00149049	0.0257543	CYR61:TMED2:MAP2K1:PKD1:PLCD3:SOCS3:JUNB:HS6ST1:MAPK1:RBPJ:WNT2
GO_NEGATIVE_REGULATION_OF_ACTIN_FILAMENT_DEPOLYMERIZATION	21	11	0.00149049	0.0257543	CAPZA1:ADD3:EPS8:TMOD3:SPTBN1:CAPG:TWF2:ADD1:LRRC16A:CAPZA2:SPTAN1
GO_ACTIN_FILAMENT_DEPOLYMERIZATION	30	14	0.0014927	0.0257543	CAPZA1:ADD3:EPS8:CFL2:TMOD3:SPTBN1:PLEK:CAPG:TWF2:ADD1:WDR1:LRRC16A:CAPZA2:SPTAN1
GO_POSITIVE_REGULATION_OF_PHAGOCYTOSIS	30	14	0.0014927	0.0257543	RAP1A:FCER1G:PTPRC:ANO6:NCKAP1L:LRP1:GAS6:RAB27A:MFGE8:CCL2:RAB31:MERTK:SLC11A1:SIRPA
GO_PROTEIN_POLYMERIZATION	168	52	0.00151303	0.026044	CAPZA1:HAX1:ADD3:TUBGCP2:ARL2:NUMA1:FCHSD2:EPS8:NCKAP1L:TUBGCP3:EVL:TMOD3:C15orf38:PFN1:GAS7:GRB2:CSNK1D:CEP192:PSTPIP2:GMFG:VASP:MYADM:CDC42EP3:SPTBN1:ACTR2:CAPG:CLASP1:WIPF1:HCK:PREX1:CDC42EP1:TWF2:PRKCD:HCLS1:ADD1:SLIT2:FER:FCHSD1:LRRC16A:AIF1:ARHGAP18:RAC1:PPP1R9A:ARPC1B:CAPZA2:PTK2B:JAK2:CDK5RAP2:SPTAN1:ABL1:CAMSAP1:WAS
GO_POSITIVE_REGULATION_OF_ALPHA_BETA_T_CELL_ACTIVATION	27	13	0.00153644	0.0263851	IL6R:PTPRC:NCKAP1L:HSPH1:SOCS1:IL4R:LGALS9:RARA:MALT1:TGFBR2:NFKBIZ:HLA-E:SYK
GO_CARDIAC_MUSCLE_CELL_PROLIFERATION	24	12	0.0015412	0.0264053	YAP1:MAPK1:TGFBR2:C3orf58:RBPJ:MEF2C:FOXC1:RIPK1:JARID2:MAPK14:WNT2:NOTCH1
GO_POSITIVE_REGULATION_OF_PLASMA_MEMBRANE_BOUNDED_CELL_PROJECTION_ASSEMBLY	53	21	0.00155486	0.0265773	FNBP1L:ARAP1:EPS8:CCP110:ATMIN:PFN1:PLEKHM1:SEPT9:CDC42EP3:RHOQ:CCDC88A:ZMYND8:RAC2:CDC42EP1:TWF2:CEP135:APC:FSCN1:RAC1:SEPT7:RALA
GO_EMBRYONIC_ORGAN_DEVELOPMENT	180	55	0.00156221	0.026641	DVL1:EPHA2:PHACTR4:CYR61:HIPK1:PBX1:EGLN1:CDKN1C:YAP1:KMT2A:CEP290:KDM2B:TMED2:SPRY2:HIF1A:ZFP36L1:FBN1:MAP2K1:SMAD3:PKD1:MAPK3:RARA:PLCD3:GRB2:SOCS3:JUNB:ID2:NCOA1:HS6ST1:COL5A2:TRAF3IP1:MAFB:MAPK1:THOC5:TGFBR2:SETD2:WNT5A:NPHP3:RBPJ:PDGFRA:MEF2C:NDST1:FOXC1:EDN1:PTK7:VEGFA:CITED2:PDGFA:WNT2:HIPK2:DNAJB6:WDR60:CTHRC1:HSF1:NOTCH1
GO_REGULATION_OF_CALCIUM_MEDIATED_SIGNALING	43	18	0.00158853	0.0270271	CAMTA1:GBP1:ATP2B4:CMKLR1:PRKACA:HOMER3:CALM3:CALM2:PLEK:FKBP1A:RCAN1:ITPR1:LMCD1:PPP3CA:PDE4D:PTK2B:SYK:DMD
GO_CONTRACTILE_ACTIN_FILAMENT_BUNDLE_ASSEMBLY	60	23	0.00160503	0.0272448	TACSTD2:RHOC:S100A10:ARAP1:PXN:EVL:SMAD3:FHOD1:PFN1:ROCK1:ITGB1BP1:ROCK2:CLASP1:SDC4:PIK3R1:LRRC16A:CTGF:RAC1:PPP1R9A:ZYX:PTK2B:ABL1:WAS
GO_CELLULAR_RESPONSE_TO_BIOTIC_STIMULUS	111	37	0.00166609	0.0282161	TNFRSF1B:PTAFR:CAPN2:VIM:SIGIRR:RELA:CASP1:CDK4:HMGB1:NFKBIA:MAPK3:CD68:CCL2:RARA:MALT1:SBNO2:ZFP36:AXL:CARD8:SIRPA:HCK:MAPK1:TSPO:WNT5A:HMGB2:PDE4D:MEF2C:MAPK14:TNFAIP3:ADAM9:MTDH:TRIB1:HSF1:SYK:TLR4:ABL1:IRAK1
GO_UROGENITAL_SYSTEM_DEVELOPMENT	161	50	0.00170537	0.0288148	CTNNBIP1:TACSTD2:NFIA:APH1A:IL6R:PBX1:CENPF:ACTA2:ARL3:CDKN1C:ILK:CAT:YAP1:CEP290:DCN:EFNB2:COL4A1:FBN1:SMAD3:FEM1B:PKD1:NUP93:RARA:STK11:KANK2:BAX:ID2:ITGA6:CFLAR:TRAF3IP1:BMP2:SDC4:ADAMTS1:WNT5A:NPHP3:MME:SLIT2:PDGFRA:IRX2:BASP1:C5orf42:MEF2C:EGR1:FOXC1:ID4:VEGFA:PDGFA:MYC:NOTCH1:PRKX
GO_RESPONSE_TO_VIRUS	165	51	0.00172818	0.0290038	ISG15:GBP1:LAMTOR5:ADAR:IFI16:PTPRC:DDIT4:ACTA2:IFIT2:IFIT3:BNIP3:IFITM2:IFITM3:FAM111A:RELA:BIRC2:STAT2:NPC2:IFI27:EIF2AK4:PML:LGALS9:SEC14L1:RIOK3:BST2:BCL3:EIF2AK2:CXCR4:TRAF3IP1:MAVS:SAMHD1:IFNAR2:AP000295,9:IL10RB:IFNAR1:IFNGR2:RRP1B:SETD2:PARP9:DTX3L:PLSCR1:IRF2:IRF1:HMGA1:MAPK14:TNFAIP3:CDK6:AP1S1:ZC3HAV1:DDX58:TSPAN6:FLNA
GO_CARDIAC_CONDUCTION	40	17	0.00174415	0.0290038	ATP1B1:ATP2B4:KCNK1:ITPR2:ATP2B1:MEF2A:DSG2:PRKACA:CALM3:SLC8A1:CALM2:ITPR1:PDE4D:GJA1:CAV1:ASPH:FLNA
GO_ALPHA_BETA_T_CELL_DIFFERENTIATION	40	17	0.00174415	0.0290038	NCKAP1L:STAT6:HMGB1:SOCS1:IL4R:LGALS9:RARA:STAT3:MALT1:BCL3:TGFBR2:FOXP1:NFKBIZ:SH3RF1:IRF1:SYK:ABL1
GO_ESTABLISHMENT_OF_CELL_POLARITY	89	31	0.00175601	0.0290038	ARHGEF2:SDCCAG8:FRMD4A:KIAA1598:FAM89B:NUMA1:RNF41:RAP1B:SPRY2:MARK3:PKD1:LLGL2:CYTH1:ROCK1:STK11:ROCK2:RAB10:CLASP1:FERMT1:MYH9:MAP4:WNT5A:AMOTL2:RUFY3:MAP1B:PTK7:FSCN1:PTK2B:UBXN2B:CDK5RAP2:MSN
GO_BRANCHING_MORPHOGENESIS_OF_AN_EPITHELIAL_TUBE	71	26	0.00178857	0.0293438	CTNNBIP1:EPHA2:TACSTD2:PBX1:ILK:YAP1:PHB2:KRAS:SPRY2:COL4A1:NFATC4:PML:PKD1:GNA13:BMP2:CTSZ:TGFBR2:WNT5A:PLXND1:SLIT2:EDN1:VEGFA:WNT2:MYC:ABL1:NOTCH1
GO_REGULATION_OF_MUSCLE_CELL_DIFFERENTIATION	71	26	0.00178857	0.0293438	RGS2:CAPN2:BHLHE41:EFNB2:PIAS1:MEF2A:IL4R:ARRB2:SPAG9:CTDP1:TCF3:CFLAR:BMP2:NFATC2:PPARA:RBPJ:MEF2C:MAML1:EDN1:FLOT1:MAPK14:SOD2:EZH2:ABL1:NOTCH1:MORF4L2
GO_NEGATIVE_REGULATION_OF_SUPRAMOLECULAR_FIBER_ORGANIZATION	71	26	0.00178857	0.0293438	TACSTD2:CAPZA1:ARHGEF2:ADD3:ARAP1:EPS8:TMOD3:C15orf38:PFN1:LDLR:GMFG:MYADM:SPTBN1:CAPG:CLASP1:TWF2:PRKCD:ADD1:SLIT2:APC:LRRC16A:PPP1R9A:CAPZA2:SPTAN1:CAMSAP1:WAS
GO_REGULATION_OF_BINDING	229	67	0.00181119	0.0296486	DVL1:SKI:CTNNBIP1:JUN:S100A10:ADAM15:IFI16:IFIT2:SORL1:LRP1:HMGB1:RB1:NFATC4:NFKBIA:STYX:LGALS3:MARK3:B2M:CCPG1:SMAD3:PKD1:MAPK3:CYLD:ARRB2:RARA:NME1:RFNG:ROCK1:PRKACA:PLAUR:BCL3:CALM3:BAX:MED25:ID2:ITGB1BP1:CALM2:SP100:FKBP1A:BMP2:CTSZ:APP:TIAM1:HMOX1:EIF3D:CSNK1E:PPARA:PRKCD:WNT5A:PARP9:DTX3L:PLXND1:ADD1:PPP3CA:HMGB2:MEF2C:FOXC1:ID4:FLOT1:ACTB:CAV1:HIPK2:CTHRC1:HSF1:JAK2:ZNF462:ABL1
GO_BONE_DEVELOPMENT	104	35	0.001824	0.02973	SKI:LEPRE1:THBS3:PTPRC:PAPSS2:SERPINH1:ANO6:FOXN3:FBN1:LRRK1:XYLT1:VKORC1:FAM101B:RARA:COL1A1:TYROBP:BMPR2:COL6A3:BMP2:COL6A1:COL6A2:TGFBR2:COL7A1:FOXP1:WHSC1:MEF2C:SPARC:FOXC1:RAB23:GJA1:SCARA3:MATN2:SEMA4D:COL27A1:PLS3
GO_RESPONSE_TO_PURINE_CONTAINING_COMPOUND	64	24	0.00182425	0.02973	PTAFR:JUN:RAP1A:SELL:LDHA:RELA:BIRC2:ITPR2:RAP1B:SSH1:PEBP1:ZFP36L1:FOS:EEF2K:PER1:COL1A1:NME1:JUNB:FOSB:SLC8A1:PNPT1:APP:SPARC:PTK2B
GO_MORPHOGENESIS_OF_A_BRANCHING_STRUCTURE	93	32	0.00187397	0.0304727	RERE:CTNNBIP1:EPHA2:TACSTD2:PBX1:ILK:YAP1:PHB2:KRAS:SPRY2:COL4A1:NFATC4:FEM1B:PML:PKD1:GNA13:GRB2:SOCS3:BMP2:CTSZ:TGFBR2:SETD2:WNT5A:PLXND1:SLIT2:EDN1:VEGFA:PDGFA:WNT2:MYC:ABL1:NOTCH1
GO_RECEPTOR_MEDIATED_ENDOCYTOSIS	150	47	0.00188935	0.030655	FNBP1L:PI4KB:FCER1G:ITGB1:CD81:FOLR2:FCHSD2:MTMR2:CBL:SORL1:CD9:CD163:LRP1:HSPH1:EFNB2:NUMB:B2M:SNX1:ARRB2:UNC119:ARHGAP27:GRB2:LGALS3BP:RAB31:PIP5K1C:LDLR:APOC1:ITGB2:TGFBR2:STAB1:SPARC:PDLIM7:FLOT1:VEGFA:CD2AP:ENPP1:RAC1:HIP1:AP1S1:CAV2:CAV1:MKLN1:MSR1:LOXL2:SCARA3:VLDLR:SYK
GO_CELLULAR_RESPONSE_TO_HORMONE_STIMULUS	370	101	0.00200378	0.0320124	GNB1:WDTC1:JUN:LEPR:PRKACB:CTSS:SHC1:HNRNPU-AS1:HNRNPU:EIF4EBP2:DDIT4:PTPRE:CRY2:RELA:PRCP:YAP1:SIK2:ADIPOR2:PHB2:NR4A1:CALCOCO1:CDK4:RAP1B:OSBPL8:ATP2B1:PXN:NCOR2:FOXO1:RB1:MAX:ZFP36L1:FOS:FBN1:RAB8B:PIAS1:ABHD2:IGF1R:SOCS1:EEF2K:PRKCB:APRT:ARRB2:PER1:RARA:STAT3:DDX5:GRB2:SOCS3:RAB31:ROCK1:KANK2:JUNB:PRKACA:ZFP36:FOSB:NUP62:ROCK2:NCOA1:RAB10:LBH:ZFP36L2:RHOQ:DDX18:CFLAR:CREB1:PTPRA:SOGA1:YWHAH:R…
GO_NEGATIVE_REGULATION_OF_MULTI_ORGANISM_PROCESS	86	30	0.00201272	0.0320124	ISG15:JUN:IFI16:IFITM2:IFITM3:SIGIRR:FAM111A:KIAA1551:MPHOSPH8:EIF2AK4:PML:SEC14L1:RIOK3:BST2:ZFP36:CARD8:EIF2AK2:TRAF3IP1:MAVS:FAM208A:PLSCR1:ZNF639:TNIP1:TNFAIP3:ZC3HAV1:TRIM35:TRIB1:TRIM14:TIMP1:TSPAN6
GO_PATTERN_SPECIFICATION_PROCESS	135	43	0.00203375	0.0320124	SKI:CTNNBIP1:C1QA:SSBP3:PRKACB:HIPK1:PBX1:PLXNA2:BHLHE41:KDM2B:TMED2:HIF1A:SMAD3:RFNG:PRKACA:ZEB2:ACVR2A:BMPR2:NRP2:TRAF3IP1:BMP2:POFUT1:MAFB:ETS2:TGFBR2:WNT5A:NPHP3:RBPJ:SHROOM3:IRX2:BASP1:MEF2C:APC:FOXC1:EDN1:CITED2:WNT2:HIPK2:ASPH:NOTCH1:BCOR:ATP6AP2:EFNB1
GO_T_CELL_ACTIVATION_INVOLVED_IN_IMMUNE_RESPONSE	34	15	0.0020574	0.0322428	FCER1G:STAT6:HMGB1:LGALS3:EIF2AK4:RAB27A:IL4R:LGALS9:RARA:STAT3:MALT1:BCL3:SLC11A1:FOXP1:NFKBIZ
GO_POSITIVE_REGULATION_OF_T_CELL_PROLIFERATION	34	15	0.0020574	0.0322428	VCAM1:IL6R:PTPRC:NCKAP1L:HMGB1:TNFSF13B:LGALS9:TGFBR2:IL6ST:HLA-E:AIF1:HLA-DPA1:HLA-DPB1:SYK:EFNB1
GO_NEGATIVE_REGULATION_OF_MOLECULAR_FUNCTION	566	147	0.00206854	0.0323485	DVL1:CTNNBIP1:DFFA:WDTC1:JUN:LEPR:GADD45A:LAMTOR5:ANP32E:ADAR:ADAM15:IFI16:RGS2:PTPRC:PPP1R12B:ATP2B4:PPP2R5A:EGLN1:HNRNPU-AS1:HNRNPU:IFIT2:DUSP5:SIGIRR:CDKN1C:ILK:MTRNR2L8:CAT:CD44:CRY2:ARL2:CST6:AIP:SERPINH1:SYTL2:BIRC2:CBL:SORL1:PHB2:NCKAP1L:DUSP6:CMKLR1:PEBP1:TMED2:RB1:SUGT1:SPRY2:FARP1:GAS6:OXA1L:NFATC4:NFKBIA:C14orf166:STYX:LGALS3:WARS:SPRED1:THBS1:EIF2AK4:B2M:OAZ2:IGF1R:PKD1:SOCS1:MVP:MAPK…
GO_REGULATION_OF_PROTEIN_COMPLEX_ASSEMBLY	271	77	0.00211043	0.0329334	CTNNBIP1:SH3GLB1:DR1:CAPZA1:RHOC:CHD1L:HAX1:ARHGEF2:FAM178A:ADD3:SVIP:ARL2:NUMA1:FCHSD2:BIRC2:ATM:SORL1:EPS8:NCKAP1L:GTF2H3:HMGB1:DNAJC15:RB1:EVL:WARS:TMOD3:C15orf38:PIEZO1:PFN1:GRB2:RIOK3:NCLN:GMFG:VASP:BAX:MED25:MYADM:EIF2AK2:CDC42EP3:SPTBN1:ACTR2:PLEK:CAPG:CLASP1:WIPF1:CREB1:TRAF3IP1:HCK:PREX1:CDC42EP1:TWF2:PRKCD:HCLS1:ADD1:SLIT2:FNIP2:FER:SEPT8:FCHSD1:LRRC16A:VEGFA:ARHGAP18:FSCN1:RAC1:VPS41:P…
GO_REGULATION_OF_PHAGOCYTOSIS	44	18	0.00216746	0.0336093	RAP1A:FCER1G:PTPRC:ANO6:NCKAP1L:LRP1:HMGB1:GAS6:RAB27A:MFGE8:CCL2:RAB31:MERTK:SLC11A1:SIRPA:HCK:APPL1:SYK
GO_REGULATION_OF_MYELOID_LEUKOCYTE_MEDIATED_IMMUNITY	31	14	0.00220119	0.0339889	PTAFR:CD84:FCER1G:IL4R:STX4:LGALS9:MAVS:ITGB2:HMOX1:RAC2:FER:HLA-E:DDX58:SYK
GO_POSITIVE_REGULATION_OF_FIBROBLAST_PROLIFERATION	31	14	0.00220119	0.0339889	JUN:ZMIZ1:CDK4:RNASEH2B:GAS6:PML:FOSL2:WNT5A:PDGFRA:CD74:PDGFA:CDK6:WNT2:MYC
GO_REGULATION_OF_CELL_MORPHOGENESIS_INVOLVED_IN_DIFFERENTIATION	155	48	0.00222692	0.0343142	MACF1:TACSTD2:GBP1:S100A10:PLXNA2:KIAA1598:ILK:LRP1:PLXNC1:SSH1:NFATC4:MAP2K1:EEF2K:SSH2:STK11:MYADM:ITGB1BP1:ACTR2:LIMS1:TTL:ZEB2:BMPR2:STK25:PREX1:TIAM1:YWHAH:PLXNB2:SS18L2:TWF2:WNT5A:PLXND1:SLIT2:RUFY3:SPP1:PPP3CA:ZSWIM6:MAP1B:RREB1:NEDD9:LRRC16A:VEGFA:RAC1:PPP1R9A:DPYSL2:SDC2:SEMA4D:ABL1:FLNA
GO_METAL_ION_HOMEOSTASIS	239	69	0.00226931	0.0348942	GNB1:ATP1B1:ABL2:PTPRC:ATP2B4:EGLN1:PDZD8:BNIP3:FTH1:C3AR1:ITPR2:LRP1:TMTC2:ATP2B1:CMKLR1:HMGB1:LPAR6:ERO1L:HIF1A:SLC12A6:B2M:SLC24A1:SMAD3:NPTN:PML:IREB2:PKD1:PRKCB:MT2A:GNA13:PRKACA:CALM3:BAX:FTL:FPR1:SLC8A1:TTC7A:CALM2:CXCR4:CYBRD1:SLC39A10:SLC11A1:FKBP1A:SNX5:APP:HMOX1:ITPR1:CCR1:GNAI2:WNT5A:ATP2C1:ATP13A3:FBXL5:PDGFRA:TMEM165:PDE4D:SLC12A2:STC2:EDN1:IBTK:FYN:CAV1:SLC39A14:PTK2B:MYC:JAK2:ABL1…
GO_POSITIVE_REGULATION_OF_VASCULATURE_DEVELOPMENT	94	32	0.00227944	0.0349769	JAK1:F3:RAP1A:HIPK1:IL6R:ITGB1:ETS1:C3AR1:HDAC7:EFNB2:HIF1A:THBS1:PRKCB:STAT3:MAP3K3:PAK4:RRAS:CYP1B1:CFLAR:ITGB2:HMOX1:TGFBR2:WNT5A:EGR1:VEGFA:SOD2:HIPK2:PTK2B:MTDH:ABL1:NOTCH1:CYBB
GO_TYPE_I_INTERFERON_PRODUCTION	83	29	0.00230731	0.0352711	ISG15:IFI16:NFKB2:POLR2L:UBE2L6:RELA:MRE11A:STAT6:HMGB1:CYLD:RIOK3:POLR2E:REL:NMI:LRRFIP1:TRAF3IP1:SIRPA:MAVS:MYD88:SETD2:ZBTB20:HMGB2:IRF1:FLOT1:TNFAIP3:DDX58:SYK:TLR4:IRAK1
GO_REGULATION_OF_RECEPTOR_SIGNALING_PATHWAY_VIA_STAT	51	20	0.00230822	0.0352711	IL6R:PTPRC:TNFRSF1A:SOCS1:ARL2BP:STAT3:SOCS3:BCL3:CYP1B1:IL10RB:HCLS1:PARP9:PARP14:IL6ST:FYN:CAV1:PTK2B:HSF1:JAK2:NOTCH1
GO_NEGATIVE_REGULATION_OF_SIGNALING	702	178	0.00231313	0.0352728	NOC2L:DVL1:SKI:CTNNBIP1:EPHA2:EYA3:PHACTR4:PRKACB:GBP1:RAP1A:MCL1:ARHGEF2:ABL2:RGS2:PTPRC:ATP2B4:OPTN:ARHGAP12:ITGB1:DDIT4:DUSP5:PTPRE:SIGIRR:CD44:SLC35C1:CRY2:CREB3L1:SDHAF2:FAM89B:RELA:TSKU:MTMR2:YAP1:ATM:SIK2:CBL:SORL1:ITFG2:PHB2:HDAC7:LRP1:RAP1B:DUSP6:DCN:MAPKAPK5:PEBP1:NCOR2:FOXO1:RB1:SPRY2:GAS6:NFATC4:NFKBIA:LGALS3:HIF1A:PPP2R5C:MARK3:SPRED1:THBS1:FBN1:CGNL1:SLC24A1:SMAD3:ULK3:IGF1R:VASN:SO…
GO_MAST_CELL_ACTIVATION	28	13	0.0023217	0.0353176	S100A12:S100A13:CD84:FCER1G:CBL:IL4R:LGALS9:HMOX1:RAC2:PLSCR1:FER:LCP2:SYK
GO_REGULATION_OF_MULTI_ORGANISM_PROCESS	223	65	0.00232567	0.0353176	ISG15:PTAFR:PPIE:JUN:PKN2:ADAR:IFI16:OPTN:IFITM2:IFITM3:SIGIRR:POLR2L:FAM111A:BIRC2:ASUN:KIAA1551:MPHOSPH8:IFI27:EIF2AK4:PML:MAPK3:POLR2A:LGALS9:SNF8:DDX5:SMURF2:SEC14L1:RIOK3:CTDP1:POLR2E:RAD23A:BST2:ZFP36:CARD8:EIF2AK2:POLR2D:TRAF3IP1:MAVS:RRP1B:LGALS1:FAM208A:FOXP1:PARP9:DTX3L:PLSCR1:ZNF639:LHFPL2:CD74:TNIP1:TNFAIP3:POLR2J:MDFIC:CAV2:CAV1:ZC3HAV1:TRIM35:PABPC1:TRIB1:DDX58:TRIM14:C9orf69:NOTCH1…
GO_POSITIVE_REGULATION_OF_FOCAL_ADHESION_ASSEMBLY	19	10	0.00234228	0.0353556	S100A10:SMAD3:ROCK1:ITGB1BP1:MAP4K4:LIMS1:SDC4:VEGFA:RAC1:ABL1
GO_NEGATIVE_REGULATION_OF_MUSCLE_HYPERTROPHY	19	10	0.00234228	0.0353556	TNFRSF1B:RGS2:ATP2B4:TNFRSF1A:FOXO1:SMAD3:CTDP1:PPARA:JARID2:NOTCH1
GO_AMINOGLYCAN_BIOSYNTHETIC_PROCESS	58	22	0.00235223	0.0353556	B3GALT6:B4GALT2:SLC35D1:HS2ST1:CSGALNACT2:B3GNT1:LUM:DCN:XYLT1:ST3GAL2:B3GNT2:HS6ST1:GPC1:SDC4:UGDH:VCAN:NDST1:B4GALT7:CHST12:SDC2:EXT1:GPC4
GO_TUBE_CLOSURE	58	22	0.00235223	0.0353556	DVL1:SKI:MTHFR:PHACTR4:PRKACB:KDM2B:TMED2:PFN1:RARA:PRKACA:VASP:ZEB2:SDC4:PLXNB2:SETD2:WNT5A:NPHP3:SHROOM3:PTK7:RALA:CTHRC1:ABL1
GO_REGULATION_OF_CELL_JUNCTION_ASSEMBLY	58	22	0.00235223	0.0353556	EPHA2:MACF1:RAP1A:S100A10:LRP1:RAP1B:THBS1:SMAD3:ROCK1:PRKACA:ITGB1BP1:ROCK2:MAP4K4:LIMS1:CLASP1:SDC4:DUSP22:FLOT1:VEGFA:RAC1:CAV1:ABL1
GO_RESPONSE_TO_TESTOSTERONE	25	12	0.00240209	0.0357763	CBL:CDK4:THBS1:NME1:GPI:ROCK2:CFLAR:TSPO:SPP1:EDN1:HSF1:MSN
GO_POSITIVE_REGULATION_OF_ADHERENS_JUNCTION_ORGANIZATION	25	12	0.00240209	0.0357763	S100A10:SMAD3:ROCK1:MAPRE2:ITGB1BP1:MAP4K4:LIMS1:SDC4:ADD1:VEGFA:RAC1:ABL1
GO_SYNCYTIUM_FORMATION	25	12	0.00240209	0.0357763	PLEKHO1:CAPN2:MYOF:IL4R:SBNO2:TYROBP:CFLAR:NFATC2:MYH9:FLOT1:MAPK14:ADAM9
GO_POSITIVE_REGULATION_OF_TYROSINE_PHOSPHORYLATION_OF_STAT_PROTEIN	25	12	0.00240209	0.0357763	IL6R:TNFRSF1A:ARL2BP:STAT3:SOCS3:HCLS1:PARP9:PARP14:IL6ST:FYN:HSF1:JAK2
GO_BONE_GROWTH	22	11	0.00241916	0.0357763	LEPR:THBS3:RARA:COL6A3:COL6A1:COL6A2:TGFBR2:COL7A1:SCARA3:MATN2:COL27A1
GO_VISUAL_BEHAVIOR	22	11	0.00241916	0.0357763	B4GALT2:ITGB1:RIC8A:KRAS:HIF1A:MEIS2:PIAS1:NPTN:CREB1:APP:DDHD2
GO_CHONDROCYTE_DEVELOPMENT	22	11	0.00241916	0.0357763	SERPINH1:FAM101B:BMPR2:COL6A3:COL6A1:COL6A2:TGFBR2:COL7A1:SCARA3:MATN2:COL27A1
GO_CELLULAR_EXTRAVASATION	22	11	0.00241916	0.0357763	PTAFR:VCAM1:SELL:ITGB1:ADAM8:CCL2:ROCK1:SIRPA:ITGB2:ITGA1:FER
GO_NEGATIVE_REGULATION_OF_RESPONSE_TO_STIMULUS	830	207	0.00244053	0.0360198	NOC2L:DVL1:SKI:CTNNBIP1:TNFRSF1B:EPHA2:EYA3:PHACTR4:PRKACB:GBP1:MCL1:ARHGEF2:IFI16:CD84:ABL2:RGS2:PTPRC:ATP2B4:OPTN:ARHGAP12:ITGB1:DDIT4:CUEDC2:DUSP5:PTPRE:SIGIRR:SVIP:CD44:SLC35C1:CRY2:CREB3L1:SDHAF2:FAM89B:RELA:TSKU:MTMR2:YAP1:ATM:SIK2:CBL:SORL1:ETS1:ITFG2:CD9:TNFRSF1A:PHB2:HDAC7:STAT6:LRP1:OS9:DUSP6:DCN:MAPKAPK5:PEBP1:NCOR2:FOXO1:RB1:SPRY2:GAS6:NFATC4:NFKBIA:LGALS3:HIF1A:PPP2R5C:MARK3:SPRED1:T…
GO_RESPIRATORY_SYSTEM_DEVELOPMENT	102	34	0.00251802	0.0370891	SKI:YAP1:KRAS:SPRY2:MAP2K1:PKD1:MAPK3:CRISPLD2:RARA:KLF2:CIC:HS6ST1:BMPR2:CREB1:CTSZ:MAPK1:THRB:TGFBR2:WNT5A:HEG1:NPHP3:MME:RBPJ:PDGFRA:BASP1:SPARC:ATXN1:PTK7:VEGFA:CTGF:PDGFA:PHF14:WNT2:NOTCH1
GO_POSITIVE_REGULATION_OF_DEFENSE_RESPONSE	244	70	0.00252444	0.0371092	PLA2G2A:C1QA:PRKACB:CTSS:S100A12:MNDA:IFI16:FCER1G:MAPKAPK2:OPTN:UBE2D1:ADAM8:RELA:BIRC2:ETS1:TNFRSF1A:KRAS:HMGB1:NFKBIA:MAPK3:CYLD:ARRB2:SEC14L1:RIOK3:PIK3C3:MALT1:LDLR:PRKACA:PVR:PSME4:IL1RL1:MAVS:HCK:APP:ITGB2:IL17RA:MYD88:PRKCD:WNT5A:APPL1:NFKBIZ:PARP9:PLSCR1:ALPK1:HMGB2:IL6ST:MAP3K1:MEF2C:PJA2:IRF1:TNIP1:RIPK1:HLA-E:FLOT1:CNPY3:FYN:TNFAIP3:RP1-111D6,3:TAB2:NAPEPLD:CAV1:CTSB:JAK2:DDX58:SYK:TL…
GO_POSITIVE_REGULATION_OF_GENE_EXPRESSION	1066	260	0.0025796	0.0378444	DVL1:SKI:CAMTA1:KIF1B:PTAFR:AGO4:AGO1:AGO3:GPBP1L1:SSBP3:JUN:NFIA:FUBP1:CYR61:DR1:HAX1:SHC1:ARHGEF2:C1orf85:IFI16:PBX1:DCAF6:FAM129A:SOX13:ELK4:MAPKAPK2:RNF187:EGLN1:HNRNPU-AS1:HNRNPU:KLF6:VIM:ZMIZ1:ACTA2:NFKB2:ADAM8:POLR2L:CD81:CDKN1C:ILK:TEAD1:CREB3L1:MDK:RPS6KA4:RELA:LRRC32:YAP1:ATM:ZNF259:KMT2A:RPUSD4:ETS1:TNFRSF1A:FOXJ2:ETV6:KRAS:MED21:TFCP2:NR4A1:CALCOCO1:STAT6:CDK4:CEP290:LUM:DCN:ELK3:GCN1…
GO_REACTIVE_OXYGEN_SPECIES_METABOLIC_PROCESS	91	31	0.00261629	0.0383062	GADD45A:CYR61:NCF2:DDIT4:BNIP3:PRCP:BIRC2:RNF41:FOXO1:HIF1A:FBLN5:THBS1:GRB2:TYROBP:CYP1B1:PREX1:ITGB2:RAC2:TSPO:TGFBR2:GNAI2:PRKCD:SOD3:RIPK1:EDN1:MAPK14:CTGF:SOD2:RAC1:SYK:CYBB
GO_NEUROTRANSMITTER_BIOSYNTHETIC_PROCESS	38	16	0.00265322	0.0384454	ATP2B4:SMAD3:KLF2:ROCK2:CYP1B1:SIRPA:ITGB2:TSPO:EDN1:AIF1:DDAH2:RAC1:CAV1:PTK2B:JAK2:TLR4
GO_POSITIVE_REGULATION_OF_TYPE_I_INTERFERON_PRODUCTION	55	21	0.00266754	0.0384454	IFI16:NFKB2:POLR2L:RELA:MRE11A:STAT6:HMGB1:RIOK3:POLR2E:LRRFIP1:MAVS:MYD88:SETD2:ZBTB20:HMGB2:IRF1:FLOT1:DDX58:SYK:TLR4:IRAK1
GO_POSITIVE_REGULATION_OF_LEUKOCYTE_MEDIATED_IMMUNITY	55	21	0.00266754	0.0384454	PTAFR:FCER1G:PTPRC:STAT6:UNG:B2M:IL4R:STX4:EXOSC6:MALT1:PVR:MSH2:MAVS:ITGB2:WHSC1:HLA-A:HLA-E:HLA-B:FAM49B:DDX58:SYK
GO_MULTICELLULAR_ORGANISMAL_HOMEOSTASIS	200	59	0.00268392	0.0386044	LEPR:PRKACB:AMPD2:PRKAB2:SCD:ADAM8:AMPD3:PRCP:YAP1:ADIPOR2:KRAS:STAT6:CMKLR1:FOXO1:RB1:NDN:B2M:IGF1R:LRRK1:IL4R:KDM6B:STAT3:PLEKHM1:STK11:PRKACA:BAX:CXCR4:BARD1:SLC11A1:INPP5D:ADAMTS5:RAC2:PRKAR2A:NPHP3:PIK3CA:ADD1:RBPJ:SPP1:ACSL1:LPCAT1:HOMER1:APC:EGR1:FOXC1:VEGFA:GJA1:CTGF:TNFAIP3:ACTB:RAC1:NAPEPLD:CAV1:PTK2B:HSF1:JAK2:SYK:TLR4:NOTCH1:TFE3
GO_PEPTIDE_SECRETION	245	70	0.00282483	0.0405518	TNFRSF1B:LEPRE1:GBP1:RAP1A:CD58:S100A12:S100A13:SRGN:ADAM8:ARL2:CPT1A:LRRC32:CASP1:ITPR2:TM7SF3:LRP1:GNPTAB:HMGB1:TNFSF13B:GAS6:MIA2:CTAGE5:HIF1A:LTBP2:RAB8B:PML:SOCS1:IL4R:MAPK3:STX4:ARL2BP:LGALS9:PTRF:PIK3C3:GPI:POU2F2:CARD8:RAB10:SPTBN1:PLEK:MAP4K4:IL1R2:IL1RL1:ITGB6:DPP4:KLF7:MAVS:FERMT1:TIAM1:IL17RA:ITPR1:WNT5A:FOXP1:RBPJ:PPP3CA:CD74:LCP2:EDN1:HLA-E:AIF1:MAPK14:TNFRSF21:HMGN3:TNFAIP3:ADAM9:J…
GO_POSITIVE_REGULATION_OF_DEPHOSPHORYLATION	35	15	0.00290985	0.0413383	CAMTA1:PTPRC:PPP2R5A:SMAD3:CALM3:PPP1R15A:CALM2:PLEK:SLC39A10:BMP2:PRKCD:ITGA1:MEF2C:PPP2R5D:JAK2
GO_NEGATIVE_REGULATION_OF_PROTEIN_COMPLEX_DISASSEMBLY	35	15	0.00290985	0.0413383	CAPZA1:ARHGEF2:ADD3:EPS8:TMOD3:SPTBN1:CAPG:CLASP1:TWF2:ADD1:APC:LRRC16A:CAPZA2:SPTAN1:CAMSAP1
GO_ENDOCHONDRAL_BONE_MORPHOGENESIS	35	15	0.00290985	0.0413383	THBS3:SERPINH1:RARA:COL1A1:BMPR2:COL6A3:COL6A1:COL6A2:TGFBR2:COL7A1:MEF2C:FOXC1:SCARA3:MATN2:COL27A1
GO_POSITIVE_REGULATION_OF_NIK_NF_KAPPAB_SIGNALING	35	15	0.00290985	0.0413383	AGO1:AGO3:ILK:RELA:HMGB1:LGALS9:MALT1:EIF2AK2:LIMS1:COPS8:APP:EDN1:C8orf4:TLR4:IRAK1
GO_CYTOKINE_PRODUCTION_INVOLVED_IN_IMMUNE_RESPONSE	45	18	0.00291337	0.0413383	TNFRSF1B:FCER1G:MR1:CUEDC2:GAS6:B2M:MAPK3:MALT1:BST2:SLC11A1:MAVS:HMOX1:WNT5A:CD74:HLA-E:MAPK14:DDX58:TLR4
GO_POSITIVE_REGULATION_OF_LYMPHOCYTE_DIFFERENTIATION	45	18	0.00291337	0.0413383	PTPRC:ZMIZ1:ADAM8:NCKAP1L:GAS6:SOCS1:IL4R:CYLD:LGALS9:RARA:MALT1:AXL:INPP5D:TGFBR2:NFKBIZ:CD74:SYK:ATP11C
GO_REGULATION_OF_DEFENSE_RESPONSE	366	99	0.00299768	0.042374	TNFRSF1B:PLA2G2A:C1QA:JAK1:PRKACB:CTSS:S100A12:MNDA:IFI16:FCER1G:PTPRC:MAPKAPK2:OPTN:UBE2D1:CUEDC2:ADAM8:RELA:BIRC2:ATM:ETS1:TNFRSF1A:KRAS:HMGB1:RB1:NFKBIA:EIF2AK4:SMAD3:PIAS1:SOCS1:MAPK3:CYLD:ARRB2:PER1:LGALS9:NFE2L1:SEC14L1:SOCS3:RIOK3:PIK3C3:MALT1:SBNO2:LDLR:PRKACA:PVR:PSME4:IL1R2:IL1RL1:NMI:TRAF3IP1:SIRPA:MAVS:HCK:SAMHD1:APP:IFNAR2:AP000295,9:IFNGR2:ITGB2:IL17RA:PPARA:MYD88:PRKCD:WNT5A:APPL1:…
GO_HEART_PROCESS	88	30	0.00300365	0.042374	ATP1B1:RGS2:ATP2B4:KCNK1:CELF2:YAP1:ITPR2:ATP2B1:PEBP1:MEF2A:DSG2:PRKACA:CALM3:SLC8A1:CALM2:ITPR1:THRB:GNAI2:PIK3CA:PDE4D:EDN1:FYN:GJA1:CTGF:CAV1:ASPH:JAK2:DMD:FLNA:TAZ
GO_RESPONSE_TO_HYDROGEN_PEROXIDE	88	30	0.00300365	0.042374	JUN:CAPN2:BNIP3:LDHA:CAT:RELA:ETS1:STAT6:FOXO1:KDM6B:COL1A1:KLF2:AXL:CYP1B1:SLC8A1:ANKZF1:STK25:SIRPA:HMOX1:PRKCD:RIPK1:FYN:MAP3K5:TNFAIP3:EZH2:PTK2B:ADAM9:HSF1:ABL1:SETX
GO_CELL_RECOGNITION	42	17	0.00325968	0.0458978	NEXN:UBAP2L:CCT3:FOLR2:CD9:LGALS3:IGHM:NDN:NPTN:MFGE8:CCT7:APP:PALLD:EMB:VCAN:TNFRSF21:MSN
GO_CELLULAR_RESPONSE_TO_INORGANIC_SUBSTANCE	96	32	0.00332001	0.0459956	JUN:SLC25A24:MTR:BNIP3:ALOX5AP:FOXO1:NFATC4:FOS:B2M:IREB2:MEF2A:EEF2K:MAPK3:FUS:MT2A:NFE2L1:JUNB:FOSB:ID2:CFLAR:CREB1:APP:MAPK1:HMOX1:TSPO:WNT5A:ADD1:MEF2C:EDN1:HSF1:ALAD:CYBB
GO_DEVELOPMENTAL_GROWTH	321	88	0.00332688	0.0459956	DVL1:WDTC1:MACF1:LEPR:ADAM15:THBS3:RGS2:ITGB1:VCL:ZMIZ1:KIAA1598:CDKN1C:ILK:YAP1:ZNF259:LRP1:CDK4:LLPH:DUSP6:TMED2:SPRY2:ZFP36L1:NDN:EIF2AK4:SMAD3:RARA:STAT3:CTDP1:STK11:KLF2:ITSN2:TTL:ZEB2:CFLAR:BMPR2:NRP2:CREB1:COL6A3:ATRN:APP:TIAM1:COL6A1:COL6A2:MAPK1:SELM:PPARA:TGFBR2:COL7A1:TWF2:WNT5A:ALCAM:HEG1:C3orf58:PIK3CA:ADD1:SLIT2:RBPJ:RUFY3:SPP1:PPP3CA:WWC2:SORBS2:BASP1:PDE4D:MAP1B:MEF2C:CYFIP2:STC2:…
GO_GLAND_DEVELOPMENT	222	64	0.00333104	0.0459956	EPHA2:JUN:RAP1A:PBX1:CDKN1C:MDK:RELA:CCND1:ETS1:PHB2:KRAS:STAT6:GNPNAT1:HIF1A:MAP2K1:SMAD3:FEM1B:PML:PKD1:MAPK3:GOT2:APRT:RARA:NME1:STK11:BAX:ID2:NCOA1:LBH:PNPT1:LIMS2:CFLAR:CREB1:BMP2:MAFB:MAPK1:HMOX1:TSPO:THRB:TGFBR2:WNT5A:PLXND1:NPHP3:PIK3CA:QDPR:RBPJ:PDGFRA:FOXC1:RREB1:JARID2:ID4:VEGFA:SLC29A1:TNFAIP3:CITED2:PDGFA:CAV1:WNT2:EZH2:AGPAT6:JAK2:ABL1:NOTCH1:MSN
GO_NEGATIVE_REGULATION_OF_IMMUNE_RESPONSE	63	23	0.00335864	0.0461421	IFI16:CD84:PTPRC:CUEDC2:STAT6:LGALS3:IL4R:ARRB2:LGALS9:BST2:IL1RL1:NMI:COL3A1:INPP5D:SAMHD1:SAMSN1:HMOX1:PARP14:FER:DUSP22:HLA-E:TNFAIP3:VSIG4
GO_NEGATIVE_REGULATION_OF_CATALYTIC_ACTIVITY	397	106	0.00339902	0.0464716	DVL1:DFFA:WDTC1:LEPR:GADD45A:LAMTOR5:ANP32E:ADAR:IFI16:RGS2:PTPRC:PPP1R12B:ATP2B4:PPP2R5A:EGLN1:HNRNPU-AS1:HNRNPU:DUSP5:CDKN1C:ILK:CD44:CRY2:ARL2:CST6:AIP:SERPINH1:SYTL2:BIRC2:CBL:SORL1:NCKAP1L:DUSP6:PEBP1:TMED2:RB1:SPRY2:FARP1:GAS6:OXA1L:C14orf166:STYX:LGALS3:WARS:SPRED1:THBS1:OAZ2:IGF1R:SOCS1:MVP:ARRB2:SMCR8:RFFL:PRPSAP1:SOCS3:CEP192:ROCK1:GADD45B:BST2:GPI:GMFG:ZFP36:PLAUR:APOC1:CARD8:PPP1R15A:…
GO_CELLULAR_RESPONSE_TO_CALCIUM_ION	29	13	0.00340792	0.0464716	JUN:SLC25A24:ALOX5AP:FOS:MEF2A:EEF2K:FUS:JUNB:FOSB:WNT5A:ADD1:MEF2C:EDN1
GO_INTERLEUKIN_2_PRODUCTION	29	13	0.00340792	0.0464716	GBP1:FCER1G:PTPRC:HDAC7:MALT1:HOMER3:ZFP36:SPTBN1:SLC11A1:PDE4D:TNFAIP3:ABL1:VSIG4
GO_PROTEIN_TRIMERIZATION	29	13	0.00340792	0.0464716	GNB1:SKI:ALOX5AP:COL1A1:WIZ:SLC1A5:NUP62:PNPT1:COL6A1:COL6A2:CD74:COL1A2:HSF1
GO_LEUKOCYTE_APOPTOTIC_PROCESS	56	21	0.00343724	0.0467357	NOC2L:DFFA:FCER1G:ADAM8:GAS6:LGALS3:HIF1A:LGALS9:AXL:BAX:MERTK:SLC39A10:WNT5A:FOXP1:HCLS1:MEF2C:CD74:PRELID1:RIPK1:TNFRSF21:TSC22D3
GO_REGULATION_OF_NEURON_DIFFERENTIATION	313	86	0.00344	0.0467357	DVL1:MACF1:MYCL:LEPRE1:RAP1A:ARHGEF2:PBX1:ABL2:RGS2:RAB7L1:PLXNA2:VIM:KIAA1598:ILK:DENND5A:DIXDC1:LRP1:LLPH:PLXNC1:SSH1:EFNB2:NFATC4:EIF2AK4:B2M:MAP2K1:NPTN:HMG20A:EEF2K:ZFHX3:PMP22:SSH2:RARA:SPAG9:NME1:CSNK1D:ROCK1:STK11:TCF3:ID2:ITSN2:NCOA1:CCDC88A:ACTR2:MAP4K4:TTL:ZEB2:CFLAR:BMPR2:STK25:BMP2:ZMYND8:PREX1:CTSZ:APP:TIAM1:YWHAH:LGALS1:CSNK1E:PLXNB2:THRB:SS18L2:TWF2:WNT5A:PLXND1:SLIT2:RUFY3:SPP1:P…
GO_HEAD_DEVELOPMENT	372	100	0.00351257	0.0476335	SKI:RERE:B4GALT2:SSBP3:RGS2:ATP2B4:PLXNA2:CENPF:ITGB1:DDIT4:BNIP3:MDK:TSKU:DDX10:DIXDC1:ETS1:CD9:KRAS:LRP1:CEP290:ATP2B1:PEBP1:KDM2B:COL4A1:HIF1A:NUMB:MAP2K1:IREB2:MAPK3:ZFHX3:CRISPLD2:ARRB2:KDM6B:RARA:COL1A1:NME1:CSNK1D:ZNF430:TYROBP:AXL:CIC:XRCC1:CALM3:BAX:RRAS:ID2:YWHAQ:NCOA1:SLC8A1:CALM2:CXCR4:HNMT:ZEB2:COL3A1:BMPR2:NRP2:CREB1:ACSL3:ATRN:BMP2:MAFB:APP:MAPK1:YWHAH:RBFOX2:CSNK1E:PLXNB2:TGFBR2:S…
GO_NEGATIVE_REGULATION_OF_CELLULAR_COMPONENT_ORGANIZATION	385	103	0.00361063	0.0488712	NOC2L:SKI:CTNNBIP1:DFFA:TNFRSF1B:TACSTD2:ODF2L:GBP1:CAPZA1:ARHGEF2:RAB7L1:CENPF:HNRNPU-AS1:HNRNPU:VIM:ADD3:BNIP3:DENND5A:SVIP:ARAP1:MTMR2:BIRC2:ATM:SORL1:TNFRSF1A:EPS8:HNRNPA1:RNF41:LRP1:HMGB1:DNAJC15:SPRY2:EFNB2:NFATC4:LGALS3:EVL:THBS1:B2M:TMOD3:DNAJA4:C15orf38:CCP110:SMG6:ARRB2:PFN1:PMP22:TOM1L2:SMCR8:UNC119:VAT1:ROCK1:RIOK3:LDLR:GMFG:XRCC1:APOC1:MYADM:ITGB1BP1:ROCK2:SPTBN1:ANTXR1:CAPG:MAP4K4:C…
GO_POSITIVE_REGULATION_OF_STRIATED_MUSCLE_CELL_DIFFERENTIATION	26	12	0.00361713	0.0488712	CAPN2:EFNB2:IL4R:ARRB2:NFATC2:RBPJ:MEF2C:MAML1:EDN1:FLOT1:MAPK14:MORF4L2
GO_REGULATION_OF_PROTEIN_BINDING	131	41	0.00364319	0.0491329	DVL1:CTNNBIP1:ADAM15:IFIT2:SORL1:LRP1:NFATC4:STYX:LGALS3:MARK3:B2M:CCPG1:PKD1:MAPK3:CYLD:ARRB2:RFNG:ROCK1:PRKACA:BAX:ITGB1BP1:FKBP1A:BMP2:CTSZ:APP:TIAM1:CSNK1E:PPARA:PRKCD:WNT5A:DTX3L:PLXND1:ADD1:MEF2C:FLOT1:ACTB:CAV1:HIPK2:CTHRC1:HSF1:ABL1
GO_NEURAL_TUBE_FORMATION	67	24	0.00368354	0.0494529	DVL1:SKI:MTHFR:LUZP1:PHACTR4:PRKACB:KDM2B:TMED2:HIF1A:PFN1:RARA:PRKACA:VASP:ZEB2:SDC4:PLXNB2:SETD2:WNT5A:NPHP3:SHROOM3:PTK7:RALA:CTHRC1:ABL1
